# Supplementary material for: Characterizing the marine iodine cycle and its relationship to ocean deoxygenation in an Earth system model
Source: Copernicus journal article supplement (doi:10.5194/bg-21-4927-2024), 2024-11-13
Supplement: Supplementary file 1 [file bg-21-4927-2024-supplement.zip]

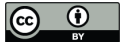

*Supplement of*

**Characterizing the marine iodine cycle and its relationship to ocean deoxygenation in an Earth system model**

**Keyi Cheng et al.**

*Correspondence to:* Keyi Cheng (chengkey@msu.edu)

- bg-21-4927-2024-supplement-title-page.pdf
- GENIE\_SI.pdf
- Table S4.xlsx
- regrided\_IO3\_06272023.nc
- regrided\_I\_06272023.nc

The copyright of individual parts of the supplement might differ from the article licence.
