# Supplementary material for: Characterizing the marine iodine cycle and its relationship to ocean deoxygenation in an Earth system model
Source: Copernicus journal article supplement (doi:10.5194/bg-21-4927-2024), 2024-11-13
Supplement: Supplementary file 1 [file bg-21-4927-2024-supplement.zip]

## Sheet: Sheet1
Cruise	Station	Unique id_Chance 2014	Latitude	Longitude	Depth	Iodide	Iodate	Total_I	Reference	TableReference	DataFrom
JR124	CTD_01	JR124_CTD_01_2	-53.3828	-41.6299	2	19.2	352.505	371.705	R. Chance, PhD thesis, University of East Anglia, 2007	Chance 2014	Rosie Chance
JR124	CTD_01	JR124_CTD_01_10	-53.3828	-41.6299	10	16.13	360.007	376.137	R. Chance, PhD thesis, University of East Anglia, 2007	Chance 2014	Rosie Chance
JR124	CTD_01	JR124_CTD_01_20	-53.3828	-41.6299	20	17.66	269.63	287.29	Chance, PhD thesis	Chance 2014	Rosie Chance
JR124	CTD_01	JR124_CTD_01_30	-53.3828	-41.6299	30	15.51	380.909	396.419	Chance, PhD thesis	Chance 2014	Rosie Chance
JR124	CTD_01	JR124_CTD_01_50	-53.3828	-41.6299	50	33.55	284.057	317.607	Chance, PhD thesis	Chance 2014	Rosie Chance
JR124	CTD_01	JR124_CTD_01_100	-53.3828	-41.6299	100	18.68	370.598	389.278	Chance, PhD thesis	Chance 2014	Rosie Chance
JR124	CTD_01	JR124_CTD_01_150	-53.3828	-41.6299	150	12.01	380.206	392.216	Chance, PhD thesis	Chance 2014	Rosie Chance
JR124	CTD_01	JR124_CTD_01_250	-53.3828	-41.6299	250	5.44	373.748	379.188	Chance, PhD thesis	Chance 2014	Rosie Chance
JR124	CTD_02	JR124_CTD_02_2	-53.7956	-37.9341	2	6.94667	309.737	316.683	R. Chance, PhD thesis, University of East Anglia, 2007	Chance 2014	Rosie Chance
JR124	CTD_02	JR124_CTD_02_10	-53.7956	-37.9341	10	5.86	360.736	366.596	R. Chance, PhD thesis, University of East Anglia, 2007	Chance 2014	Rosie Chance
JR124	CTD_02	JR124_CTD_02_20	-53.7956	-37.9341	20	16.04	372.547	388.587	Chance, PhD thesis	Chance 2014	Rosie Chance
JR124	CTD_02	JR124_CTD_02_30	-53.7956	-37.9341	30	11.4348	312.164	323.599	Chance, PhD thesis	Chance 2014	Rosie Chance
JR124	CTD_02	JR124_CTD_02_50	-53.7956	-37.9341	50	10.1897	273.514	283.703	Chance, PhD thesis	Chance 2014	Rosie Chance
JR124	CTD_02	JR124_CTD_02_70	-53.7956	-37.9341	70	18.1752	371.722	389.898	Chance, PhD thesis	Chance 2014	Rosie Chance
JR124	CTD_02	JR124_CTD_02_100	-53.7956	-37.9341	100	16.1075	348.616	364.723	Chance, PhD thesis	Chance 2014	Rosie Chance
JR124	CTD_09	JR124_CTD_09_10	-52.917	-47.733	10	16.9715	375.76	392.732	R. Chance, PhD thesis, University of East Anglia, 2007	Chance 2014	Rosie Chance
JR124	CTD_09	JR124_CTD_09_20	-52.917	-47.733	20	12.4459	393.583	406.029	Chance, PhD thesis	Chance 2014	Rosie Chance
JR124	CTD_09	JR124_CTD_09_40	-52.917	-47.733	40	13.1569	388.035	401.192	Chance, PhD thesis	Chance 2014	Rosie Chance
JR124	CTD_09	JR124_CTD_09_60	-52.917	-47.733	60	12.6701	314.103	326.773	Chance, PhD thesis	Chance 2014	Rosie Chance
JR124	CTD_09	JR124_CTD_09_80	-52.917	-47.733	80	19.125	364.209	383.334	Chance, PhD thesis	Chance 2014	Rosie Chance
JR124	CTD_09	JR124_CTD_09_100	-52.917	-47.733	100	13.7042	375.335	389.039	Chance, PhD thesis	Chance 2014	Rosie Chance
JR124	CTD_09	JR124_CTD_09_250	-52.917	-47.733	250	7.99035	385.129	393.119	Chance, PhD thesis	Chance 2014	Rosie Chance
JR124	CTD_10	JR124_CTD_10_10	-53.033	-48.9	10	26.5117	388.587	415.099	R. Chance, PhD thesis, University of East Anglia, 2007	Chance 2014	Rosie Chance
JR124	CTD_10	JR124_CTD_10_20	-53.033	-48.9	20	23.1804	366.752	389.933	Chance, PhD thesis	Chance 2014	Rosie Chance
JR124	CTD_10	JR124_CTD_10_40	-53.033	-48.9	40	12.3953	325.291	337.686	Chance, PhD thesis	Chance 2014	Rosie Chance
JR124	CTD_10	JR124_CTD_10_60	-53.033	-48.9	60	13.0372	396.441	409.478	Chance, PhD thesis	Chance 2014	Rosie Chance
JR124	CTD_10	JR124_CTD_10_80	-53.033	-48.9	80	13.9971	385.022	399.02	Chance, PhD thesis	Chance 2014	Rosie Chance
JR124	CTD_10	JR124_CTD_10_100	-53.033	-48.9	100	22.9653	381.858	404.823	Chance, PhD thesis	Chance 2014	Rosie Chance
JR124	CTD_10	JR124_CTD_10_250	-53.033	-48.9	250	6.83391	402.577	409.411	Chance, PhD thesis	Chance 2014	Rosie Chance
JR124	CTD_11	JR124_CTD_11_10	-53.733	-52.233	10	12.7112	394.439	407.15	R. Chance, PhD thesis, University of East Anglia, 2007	Chance 2014	Rosie Chance
JR124	CTD_11	JR124_CTD_11_20	-53.733	-52.233	20	12.4966	395.413	407.909	Chance, PhD thesis	Chance 2014	Rosie Chance
JR124	CTD_11	JR124_CTD_11_40	-53.733	-52.233	40	12.6351	384.98	397.615	Chance, PhD thesis	Chance 2014	Rosie Chance
JR124	CTD_11	JR124_CTD_11_60	-53.733	-52.233	60	12.1064	369.537	381.643	Chance, PhD thesis	Chance 2014	Rosie Chance
JR124	CTD_11	JR124_CTD_11_80	-53.733	-52.233	80	14.3404	382.235	396.575	Chance, PhD thesis	Chance 2014	Rosie Chance
JR124	CTD_11	JR124_CTD_11_100	-53.733	-52.233	100	15.4297	373.059	388.489	Chance, PhD thesis	Chance 2014	Rosie Chance
JR124	CTD_11	JR124_CTD_11_150	-53.733	-52.233	150	15.4574	385.082	400.539	Chance, PhD thesis	Chance 2014	Rosie Chance
JR124	CTD_11	JR124_CTD_11_250	-53.733	-52.233	250	12.0156	394.974	406.99	Chance, PhD thesis	Chance 2014	Rosie Chance
JR124	CTD_12	JR124_CTD_12_10	-54.6654	-58.541	10	18.67	375.136	393.806	R. Chance, PhD thesis, University of East Anglia, 2007	Chance 2014	Rosie Chance
JR124	CTD_12	JR124_CTD_12_20	-54.6654	-58.541	20	21.74	374.942	396.682	Chance, PhD thesis	Chance 2014	Rosie Chance
JR124	CTD_12	JR124_CTD_12_40	-54.6654	-58.541	40	19.49	384.28	403.77	Chance, PhD thesis	Chance 2014	Rosie Chance
JR124	CTD_12	JR124_CTD_12_60	-54.6654	-58.541	60	12.34	381.502	393.842	Chance, PhD thesis	Chance 2014	Rosie Chance
JR124	CTD_12	JR124_CTD_12_80	-54.6654	-58.541	80	12.4113	381.172	393.583	Chance, PhD thesis	Chance 2014	Rosie Chance
JR124	CTD_12	JR124_CTD_12_100	-54.6654	-58.541	100	18.03	384.889	402.919	Chance, PhD thesis	Chance 2014	Rosie Chance
JR124	CTD_12	JR124_CTD_12_200	-54.6654	-58.541	200	13.48	376.61	390.09	Chance, PhD thesis	Chance 2014	Rosie Chance
JR124	CTD_12	JR124_CTD_12_300	-54.6654	-58.541	300	12.4	392.467	404.867	Chance, PhD thesis	Chance 2014	Rosie Chance
JR124	CTD_13	JR124_CTD_13_5	-57.4062	-56.8212	5	26.68	347.74	374.42	R. Chance, PhD thesis, University of East Anglia, 2007	Chance 2014	Rosie Chance
JR124	CTD_13	JR124_CTD_13_20	-57.4062	-56.8212	20	31.6	372.984	404.584	Chance, PhD thesis	Chance 2014	Rosie Chance
JR124	CTD_13	JR124_CTD_13_40	-57.4062	-56.8212	40	21.24	381.362	402.602	Chance, PhD thesis	Chance 2014	Rosie Chance
JR124	CTD_13	JR124_CTD_13_60	-57.4062	-56.8212	60	23.7312	361.983	385.715	Chance, PhD thesis	Chance 2014	Rosie Chance
JR124	CTD_13	JR124_CTD_13_80	-57.4062	-56.8212	80	20.97	378.839	399.809	Chance, PhD thesis	Chance 2014	Rosie Chance
JR124	CTD_13	JR124_CTD_13_100	-57.4062	-56.8212	100	23.4206	378.233	401.654	Chance, PhD thesis	Chance 2014	Rosie Chance
JR124	CTD_13	JR124_CTD_13_250	-57.4062	-56.8212	250	7.6	373.991	381.591	Chance, PhD thesis	Chance 2014	Rosie Chance
JR124	CTD_14	JR124_CTD_14_10	-60.6632	-54.7921	10	24.0284	361.487	385.516	R. Chance, PhD thesis, University of East Anglia, 2007	Chance 2014	Rosie Chance
JR124	CTD_14	JR124_CTD_14_20	-60.6632	-54.7921	20	17.81	372.032	389.842	Chance, PhD thesis	Chance 2014	Rosie Chance
JR124	CTD_14	JR124_CTD_14_30	-60.6632	-54.7921	30	17.67	386.904	404.574	Chance, PhD thesis	Chance 2014	Rosie Chance
JR124	CTD_14	JR124_CTD_14_40	-60.6632	-54.7921	40	15.57	386.372	401.942	Chance, PhD thesis	Chance 2014	Rosie Chance
JR124	CTD_14	JR124_CTD_14_60	-60.6632	-54.7921	60	11.862	404.705	416.567	Chance, PhD thesis	Chance 2014	Rosie Chance
JR124	CTD_14	JR124_CTD_14_100	-60.6632	-54.7921	100	10.3411	396.29	406.631	Chance, PhD thesis	Chance 2014	Rosie Chance
JR124	CTD_14	JR124_CTD_14_250	-60.6632	-54.7921	250	9.58	403.699	413.279	Chance, PhD thesis	Chance 2014	Rosie Chance
JR124	DP_1	JR124_DP_1_6	-55.1215	-58.2593	6	22.6986	358.467	381.166	R. Chance, PhD thesis, University of East Anglia, 2007	Chance 2014	Rosie Chance
JR124	DP_10	JR124_DP_10_6	-59.026	-55.8439	6	25.97	387.809	413.779	R. Chance, PhD thesis, University of East Anglia, 2007	Chance 2014	Rosie Chance
JR124	DP_11	JR124_DP_11_6	-59.1697	-55.7513	6	27.9426	372.882	400.825	R. Chance, PhD thesis, University of East Anglia, 2007	Chance 2014	Rosie Chance
JR124	DP_12	JR124_DP_12_6	-59.7366	-55.3991	6	24.21	365.486	389.696	R. Chance, PhD thesis, University of East Anglia, 2007	Chance 2014	Rosie Chance
JR124	DP_2	JR124_DP_2_6	-55.5423	-57.9468	6	20.2247	367.48	387.705	R. Chance, PhD thesis, University of East Anglia, 2007	Chance 2014	Rosie Chance
JR124	DP_3	JR124_DP_3_6	-55.8375	-57.785	6	12.59	365.775	378.365	R. Chance, PhD thesis, University of East Anglia, 2007	Chance 2014	Rosie Chance
JR124	DP_4	JR124_DP_4_6	-56.3695	-57.4875	6	8.6699	389.298	397.968	R. Chance, PhD thesis, University of East Anglia, 2007	Chance 2014	Rosie Chance
JR124	DP_5	JR124_DP_5_6	-56.4819	-57.4281	6	10.294	383.349	393.642	R. Chance, PhD thesis, University of East Anglia, 2007	Chance 2014	Rosie Chance
JR124	DP_6	JR124_DP_6_6	-57.1064	-56.9705	6	18.94	371.881	390.821	R. Chance, PhD thesis, University of East Anglia, 2007	Chance 2014	Rosie Chance
JR124	DP_7	JR124_DP_7_6	-57.8012	-56.5995	6	28.5	369.173	397.673	R. Chance, PhD thesis, University of East Anglia, 2007	Chance 2014	Rosie Chance
JR124	DP_8	JR124_DP_8_6	-57.9018	-56.5372	6	33.68	359.346	393.026	R. Chance, PhD thesis, University of East Anglia, 2007	Chance 2014	Rosie Chance
JR124	DP_9	JR124_DP_9_6	-58.7644	-56.0189	6	26.2999	376.574	402.874	R. Chance, PhD thesis, University of East Anglia, 2007	Chance 2014	Rosie Chance
JR124	LT_1	JR124_LT_1_6	-53.7147	-36.7966	6	16.2016	394.229	410.431	R. Chance, PhD thesis, University of East Anglia, 2007	Chance 2014	Rosie Chance
JR124	LT_10	JR124_LT_10_6	-52.5478	-37.3045	6	7.26747	374.32	381.587	R. Chance, PhD thesis, University of East Anglia, 2007	Chance 2014	Rosie Chance
JR124	LT_11	JR124_LT_11_6	-52.4222	-37.4284	6	6.0065	377.425	383.431	R. Chance, PhD thesis, University of East Anglia, 2007	Chance 2014	Rosie Chance
JR124	LT_12	JR124_LT_12_6	-52.2934	-37.4654	6	12.7164	380.47	393.186	R. Chance, PhD thesis, University of East Anglia, 2007	Chance 2014	Rosie Chance
JR124	LT_13	JR124_LT_13_6	-52.166	-37.5534	6	14.9721	309.081	324.053	R. Chance, PhD thesis, University of East Anglia, 2007	Chance 2014	Rosie Chance
JR124	LT_14	JR124_LT_14_6	-52.0318	-37.6122	6	15.9836	364.752	380.735	R. Chance, PhD thesis, University of East Anglia, 2007	Chance 2014	Rosie Chance
JR124	LT_15	JR124_LT_15_6	-51.9158	-37.6732	6	15.7157	388.478	404.194	R. Chance, PhD thesis, University of East Anglia, 2007	Chance 2014	Rosie Chance
JR124	LT_16	JR124_LT_16_6	-51.7816	-37.7335	6	20.898	355.886	376.784	R. Chance, PhD thesis, University of East Anglia, 2007	Chance 2014	Rosie Chance
JR124	LT_17	JR124_LT_17_6	-51.6541	-37.7957	6	32.6295	366.213	398.843	R. Chance, PhD thesis, University of East Anglia, 2007	Chance 2014	Rosie Chance
JR124	LT_2	JR124_LT_2_6	-53.5825	-36.8611	6	6.02203	386.601	392.623	R. Chance, PhD thesis, University of East Anglia, 2007	Chance 2014	Rosie Chance
JR124	LT_3	JR124_LT_3_6	-53.4547	-36.9254	6	6.2783	377.956	384.235	R. Chance, PhD thesis, University of East Anglia, 2007	Chance 2014	Rosie Chance
JR124	LT_4	JR124_LT_4_6	-53.3243	-36.9951	6	7.02467	368.183	375.207	R. Chance, PhD thesis, University of East Anglia, 2007	Chance 2014	Rosie Chance
JR124	LT_5	JR124_LT_5_6	-53.1942	-37.055	6	11.8712	385.34	397.211	R. Chance, PhD thesis, University of East Anglia, 2007	Chance 2014	Rosie Chance
JR124	LT_6	JR124_LT_6_6	-53.0724	-37.1141	6	18.399	380.049	398.448	R. Chance, PhD thesis, University of East Anglia, 2007	Chance 2014	Rosie Chance
JR124	LT_7	JR124_LT_7_6	-52.9371	-37.1697	6	9.85881	362.438	372.297	R. Chance, PhD thesis, University of East Anglia, 2007	Chance 2014	Rosie Chance
JR124	LT_8	JR124_LT_8_6	-52.8023	-37.102	6	19.0095	392.022	411.032	R. Chance, PhD thesis, University of East Anglia, 2007	Chance 2014	Rosie Chance
JR124	LT_9	JR124_LT_9_6	-52.6772	-37.2026	6	15.8556	385.421	401.276	R. Chance, PhD thesis, University of East Anglia, 2007	Chance 2014	Rosie Chance
JR124	UW_1	JR124_UW_1_6	-51.8911	-56.4991	6	20.9913	361.813	382.804	R. Chance, PhD thesis, University of East Anglia, 2007	Chance 2014	Rosie Chance
JR124	UW_2	JR124_UW_2_6	-52.0692	-55.6283	6	20.0427	368.466	388.508	R. Chance, PhD thesis, University of East Anglia, 2007	Chance 2014	Rosie Chance
JR124	UW_3	JR124_UW_3_6	-52.5686	-57.8988	6	30.82	362.649	393.469	R. Chance, PhD thesis, University of East Anglia, 2007	Chance 2014	Rosie Chance
JR124	WCB_1	JR124_WCB_1_10	-53.3172	-39.3035	10	13.5545	369.679	383.234	R. Chance, PhD thesis, University of East Anglia, 2007	Chance 2014	Rosie Chance
JR124	WCB_1	JR124_WCB_1_20	-53.3172	-39.3035	20	11.8949	371.557	383.452	Chance, PhD thesis	Chance 2014	Rosie Chance
JR124	WCB_1	JR124_WCB_1_30	-53.3172	-39.3035	30	11.4718	366.372	377.844	Chance, PhD thesis	Chance 2014	Rosie Chance
JR124	WCB_1	JR124_WCB_1_40	-53.3172	-39.3035	40	13.0552	375.909	388.965	Chance, PhD thesis	Chance 2014	Rosie Chance
JR124	WCB_1	JR124_WCB_1_60	-53.3172	-39.3035	60	15.1593	378.175	393.334	Chance, PhD thesis	Chance 2014	Rosie Chance
JR124	WCB_1	JR124_WCB_1_80	-53.3172	-39.3035	80	35.6698	370.494	406.163	Chance, PhD thesis	Chance 2014	Rosie Chance
JR124	WCB_1	JR124_WCB_1_250	-53.3172	-39.3035	250	5.14975	422.994	428.144	Chance, PhD thesis	Chance 2014	Rosie Chance
JR124	WCB_1	JR124_WCB_1_500	-53.3172	-39.3035	500	1.65106	394.16	395.811	Chance, PhD thesis	Chance 2014	Rosie Chance
JR124	WCB_2	JR124_WCB_2_10	-54.0233	-39.0891	10	15.8967	376.141	392.037	R. Chance, PhD thesis, University of East Anglia, 2007	Chance 2014	Rosie Chance
JR124	WCB_2	JR124_WCB_2_20	-54.0233	-39.0891	20	13.5234	361.978	375.502	Chance, PhD thesis	Chance 2014	Rosie Chance
JR124	WCB_2	JR124_WCB_2_40	-54.0233	-39.0891	40	18.2577	371.371	389.629	Chance, PhD thesis	Chance 2014	Rosie Chance
JR124	WCB_2	JR124_WCB_2_60	-54.0233	-39.0891	60	22.7377	373.011	395.748	Chance, PhD thesis	Chance 2014	Rosie Chance
JR124	WCB_2	JR124_WCB_2_100	-54.0233	-39.0891	100	15.72	389.604	405.324	Chance, PhD thesis	Chance 2014	Rosie Chance
JR124	WCB_2	JR124_WCB_2_150	-54.0233	-39.0891	150	9.93171	378.024	387.956	Chance, PhD thesis	Chance 2014	Rosie Chance
JR124	WCB_2	JR124_WCB_2_208	-54.0233	-39.0891	208	12.5488	419.195	431.743	Chance, PhD thesis	Chance 2014	Rosie Chance
JR124	WCB_3	JR124_WCB_3_2	-53.9614	-38.5266	2	12.6203	358.443	371.063	R. Chance, PhD thesis, University of East Anglia, 2007	Chance 2014	Rosie Chance
JR124	WCB_3	JR124_WCB_3_10	-53.9614	-38.5266	10	16.2013	396.352	412.554	R. Chance, PhD thesis, University of East Anglia, 2007	Chance 2014	Rosie Chance
JR124	WCB_3	JR124_WCB_3_20	-53.9614	-38.5266	20	10.6905	378.548	389.238	Chance, PhD thesis	Chance 2014	Rosie Chance
JR124	WCB_3	JR124_WCB_3_40	-53.9614	-38.5266	40	13.1913	353.444	366.635	Chance, PhD thesis	Chance 2014	Rosie Chance
JR124	WCB_3	JR124_WCB_3_60	-53.9614	-38.5266	60	15.7009	373.844	389.545	Chance, PhD thesis	Chance 2014	Rosie Chance
JR124	WCB_3	JR124_WCB_3_80	-53.9614	-38.5266	80	27.214	359.773	386.987	Chance, PhD thesis	Chance 2014	Rosie Chance
JR124	WCB_3	JR124_WCB_3_100	-53.9614	-38.5266	100	16.99	384.679	401.669	Chance, PhD thesis	Chance 2014	Rosie Chance
JR124	WCB_3	JR124_WCB_3_140	-53.9614	-38.5266	140	10.5504	369.496	380.046	Chance, PhD thesis	Chance 2014	Rosie Chance
JR124	WCB_4	JR124_WCB_4_10	-53.2552	-38.7517	10	14.38	346.404	360.784	R. Chance, PhD thesis, University of East Anglia, 2007	Chance 2014	Rosie Chance
JR124	WCB_4	JR124_WCB_4_20	-53.2552	-38.7517	20	15.6204	361.629	377.249	Chance, PhD thesis	Chance 2014	Rosie Chance
JR124	WCB_4	JR124_WCB_4_40	-53.2552	-38.7517	40		434.758		Chance, PhD thesis	Chance 2014	Rosie Chance
JR124	WCB_4	JR124_WCB_4_60	-53.2552	-38.7517	60	13.227	366.844	380.071	Chance, PhD thesis	Chance 2014	Rosie Chance
JR124	WCB_4	JR124_WCB_4_80	-53.2552	-38.7517	80	12.3303	369.637	381.967	Chance, PhD thesis	Chance 2014	Rosie Chance
JR124	WCB_4	JR124_WCB_4_250	-53.2552	-38.7517	250	7.43355	420.624	428.058	Chance, PhD thesis	Chance 2014	Rosie Chance
JR124	WCB_4	JR124_WCB_4_500	-53.2552	-38.7517	500	3.55473	420.782	424.337	Chance, PhD thesis	Chance 2014	Rosie Chance
JR124	WCB_4	JR124_WCB_4_1000	-53.2552	-38.7517	1000	10.8698	366.677	377.546	Chance, PhD thesis	Chance 2014	Rosie Chance
JR124	WCB_5	JR124_WCB_5_10	-53.1852	-38.1403	10	13.8545	385.841	399.695	R. Chance, PhD thesis, University of East Anglia, 2007	Chance 2014	Rosie Chance
JR124	WCB_5	JR124_WCB_5_20	-53.1852	-38.1403	20	10.1987	379.298	389.496	Chance, PhD thesis	Chance 2014	Rosie Chance
JR124	WCB_5	JR124_WCB_5_40	-53.1852	-38.1403	40	7.77459	383.011	390.786	Chance, PhD thesis	Chance 2014	Rosie Chance
JR124	WCB_5	JR124_WCB_5_60	-53.1852	-38.1403	60	15.726	395.135	410.861	Chance, PhD thesis	Chance 2014	Rosie Chance
JR124	WCB_5	JR124_WCB_5_80	-53.1852	-38.1403	80	9.8086	382.295	392.104	Chance, PhD thesis	Chance 2014	Rosie Chance
JR124	WCB_5	JR124_WCB_5_250	-53.1852	-38.1403	250	9.65372	400.947	410.601	Chance, PhD thesis	Chance 2014	Rosie Chance
JR124	WCB_5	JR124_WCB_5_500	-53.1852	-38.1403	500	2.41539	404.692	407.107	Chance, PhD thesis	Chance 2014	Rosie Chance
JR124	WCB_5	JR124_WCB_5_1000	-53.1852	-38.1403	1000		415.522		Chance, PhD thesis	Chance 2014	Rosie Chance
JR124	WCB_6	JR124_WCB_6_10	-53.883	-37.9	10	16.5954	372.696	389.291	R. Chance, PhD thesis, University of East Anglia, 2007	Chance 2014	Rosie Chance
JR124	WCB_6	JR124_WCB_6_20	-53.883	-37.9	20	10.5163	262.392	272.908	Chance, PhD thesis	Chance 2014	Rosie Chance
JR124	WCB_6	JR124_WCB_6_30	-53.883	-37.9	30	14.9587	333.397	348.355	Chance, PhD thesis	Chance 2014	Rosie Chance
JR124	WCB_6	JR124_WCB_6_40	-53.883	-37.9	40	16.5725	382.019	398.592	Chance, PhD thesis	Chance 2014	Rosie Chance
JR124	WCB_6	JR124_WCB_6_60	-53.883	-37.9	60	14.4977	310.806	325.303	Chance, PhD thesis	Chance 2014	Rosie Chance
JR124	WCB_6	JR124_WCB_6_100	-53.883	-37.9	100	22.2018	398.084	420.286	Chance, PhD thesis	Chance 2014	Rosie Chance
D325	A008	D325_A008_2	17.69	-22.7797	2	162.64	110.881	273.521	Chance R., unpublished	Chance 2014	Rosie Chance
D325	A011	D325_A011_2	17.6663	-22.7788	2	167.31	283.902	451.212	Chance R., unpublished	Chance 2014	Rosie Chance
D325	A012	D325_A012_2	17.6533	-22.778	2	185.65	292.541	478.191	Chance R., unpublished	Chance 2014	Rosie Chance
D325	A018	D325_A018_2	17.6007	-22.8173	2	165.73	292.092	457.822	Chance R., unpublished	Chance 2014	Rosie Chance
D325	A020	D325_A020_2	17.5952	-22.81	2	179.02	287.988	467.008	Chance R., unpublished	Chance 2014	Rosie Chance
D325	A021	D325_A021_2	17.589	-22.8093	2		286.632		Chance, unpublished	Chance 2014	Rosie Chance
D325	A022	D325_A022_2	17.5875	-22.8115	2	195.96	292.999	488.959	Chance R., unpublished	Chance 2014	Rosie Chance
D325	B030	D325_B030_2	16.8897	-24.8363	2	165.25	311.354	476.604	Chance R., unpublished	Chance 2014	Rosie Chance
D325	C041	D325_C041_2	16.0052	-23.6848	2	149.67	302.643	452.313	Chance R., unpublished	Chance 2014	Rosie Chance
D325	C045	D325_C045_2	16.0203	-23.7387	2		277.445		Chance, unpublished	Chance 2014	Rosie Chance
D325	C046	D325_C046_2	16.0282	-23.7472	2	214.22	244.356	458.576	Chance R., unpublished	Chance 2014	Rosie Chance
D325	C047	D325_C047_2	16.03	-23.7538	2		280.956		Chance, unpublished	Chance 2014	Rosie Chance
D325	C048	D325_C048_2	16.0157	-23.7693	2	201.93	276.225	478.155	Chance R., unpublished	Chance 2014	Rosie Chance
D325	C049	D325_C049_2	16.027	-24.6073	2	170.16	272.573	442.733	Chance R., unpublished	Chance 2014	Rosie Chance
D325	C055	D325_C055_2	16.0212	-23.7738	2	195.47	287.191	482.661	Chance R., unpublished	Chance 2014	Rosie Chance
D325	E087	D325_E087_2	20.8373	-25.0038	2	149.98	295.407	445.387	Chance R., unpublished	Chance 2014	Rosie Chance
D325	E088	D325_E088_2	20.8528	-25.0038	2	167.95	296.373	464.323	Chance R., unpublished	Chance 2014	Rosie Chance
D325	E089	D325_E089_2	20.8748	-25.016	2	168.12	274.153	442.273	Chance R., unpublished	Chance 2014	Rosie Chance
D325	E091	D325_E091_2	20.9157	-25.3582	2	177.8	290.093	467.893	Chance R., unpublished	Chance 2014	Rosie Chance
D325	E095	D325_E095_2	21.4	-25.0468	2	148.88	287.678	436.558	Chance R., unpublished	Chance 2014	Rosie Chance
D325	E098	D325_E098_2	21.098	-25.0397	2	159.61	265.941	425.551	Chance R., unpublished	Chance 2014	Rosie Chance
D325	B030	D325_B030_7	16.8897	-24.8363	7	157.95	301.557	459.507	Chance R., unpublished	Chance 2014	Rosie Chance
D325	C041	D325_C041_7	16.0052	-23.6848	7		281.891		Chance, unpublished	Chance 2014	Rosie Chance
D325	A008	D325_A008_9	17.69	-22.7797	9	159.21	277.534	436.744	Chance R., unpublished	Chance 2014	Rosie Chance
D325	C043	D325_C043_9	16.0228	-23.7273	9		279.807		Chance, unpublished	Chance 2014	Rosie Chance
D325	C045	D325_C045_9	16.0203	-23.7387	9		287.4		Chance, unpublished	Chance 2014	Rosie Chance
D325	C050	D325_C050_9	16.0393	-23.7735	9	148.59	271.617	420.207	Chance R., unpublished	Chance 2014	Rosie Chance
D325	C051	D325_C051_9	16.038	-23.7788	9	202.39	267.522	469.912	Chance R., unpublished	Chance 2014	Rosie Chance
D325	C052	D325_C052_9	16.0292	-23.776	9		267.522		Chance, unpublished	Chance 2014	Rosie Chance
D325	C054	D325_C054_9	16.0217	-23.7703	9	203.45	272.381	475.831	Chance R., unpublished	Chance 2014	Rosie Chance
D325	C055	D325_C055_9	16.0212	-23.7738	9	181.61	280.095	461.705	Chance R., unpublished	Chance 2014	Rosie Chance
D325	B030	D325_B030_12	16.8897	-24.8363	12	154.99	316.54	471.53	Chance R., unpublished	Chance 2014	Rosie Chance
D325	E086	D325_E086_13	20.6908	-24.963	13	146.36	301.446	447.806	Chance R., unpublished	Chance 2014	Rosie Chance
D325	F107	D325_F107_17	26.068	-23.9928	17	103.22	318.835	422.055	Chance R., unpublished	Chance 2014	Rosie Chance
D325	B030	D325_B030_18	16.8897	-24.8363	18	159.81	243.551	403.361	Chance R., unpublished	Chance 2014	Rosie Chance
D325	C041	D325_C041_18	16.0052	-23.6848	18		281.891		Chance, unpublished	Chance 2014	Rosie Chance
D325	A008	D325_A008_23	17.69	-22.7797	23	162.46	281.882	444.342	Chance, unpublished	Chance 2014	Rosie Chance
D325	D063	D325_D063_23	17.681	-22.8692	23	161.14	288.284	449.424	Chance, unpublished	Chance 2014	Rosie Chance
D325	B030	D325_B030_29	16.8897	-24.8363	29	143.76	310.457	454.217	Chance, unpublished	Chance 2014	Rosie Chance
D325	E086	D325_E086_33	20.6908	-24.963	33	148.72	291.664	440.384	Chance, unpublished	Chance 2014	Rosie Chance
D325	A008	D325_A008_40	17.69	-22.7797	40		323.419		Chance, unpublished	Chance 2014	Rosie Chance
D325	F107	D325_F107_46	26.068	-23.9928	46	110.83	320.604	431.434	Chance, unpublished	Chance 2014	Rosie Chance
D325	B030	D325_B030_50	16.8897	-24.8363	50	126.6	326.015	452.615	Chance, unpublished	Chance 2014	Rosie Chance
D325	A008	D325_A008_65	17.69	-22.7797	65		369.604		Chance, unpublished	Chance 2014	Rosie Chance
D325	C041	D325_C041_65	16.0052	-23.6848	65	74.07	300.158	374.228	Chance, unpublished	Chance 2014	Rosie Chance
D325	D063	D325_D063_65	17.681	-22.8692	65	133.82	293.636	427.456	Chance, unpublished	Chance 2014	Rosie Chance
D325	B030	D325_B030_80	16.8897	-24.8363	80	65.84	432.109	497.949	Chance, unpublished	Chance 2014	Rosie Chance
D325	E086	D325_E086_80	20.6908	-24.963	80	135.81	303.982	439.792	Chance, unpublished	Chance 2014	Rosie Chance
D325	E086	D325_E086_95	20.6908	-24.963	95	142.88	302.895	445.775	Chance, unpublished	Chance 2014	Rosie Chance
D325	A008	D325_A008_100	17.69	-22.7797	100		382.696		Chance, unpublished	Chance 2014	Rosie Chance
D325	C041	D325_C041_100	16.0052	-23.6848	100		392.561		Chance, unpublished	Chance 2014	Rosie Chance
D325	D063	D325_D063_100	17.681	-22.8692	100	45.57	282.281	327.851	Chance, unpublished	Chance 2014	Rosie Chance
D325	E086	D325_E086_100	20.6908	-24.963	100	123.333	298.186	421.519	Chance, unpublished	Chance 2014	Rosie Chance
D325	F107	D325_F107_100	26.068	-23.9928	100	113.39	334.645	448.035	Chance, unpublished	Chance 2014	Rosie Chance
D325	F107	D325_F107_110	26.068	-23.9928	110		323.443		Chance, unpublished	Chance 2014	Rosie Chance
D325	F107	D325_F107_130	26.068	-23.9928	130	68.55	326.412	394.962	Chance, unpublished	Chance 2014	Rosie Chance
D325	A008	D325_A008_200	17.69	-22.7797	200	10.12	399.263	409.383	Chance, unpublished	Chance 2014	Rosie Chance
D325	C041	D325_C041_200	16.0052	-23.6848	200	9.06	437.421	446.481	Chance, unpublished	Chance 2014	Rosie Chance
D325	D063	D325_D063_200	17.681	-22.8692	200	10.38	394.457	404.837	Chance, unpublished	Chance 2014	Rosie Chance
D325	E086	D325_E086_200	20.6908	-24.963	200	11.93	375.715	387.645	Chance, unpublished	Chance 2014	Rosie Chance
D325	F107	D325_F107_200	26.068	-23.9928	200	10.87	395.286	406.156	Chance, unpublished	Chance 2014	Rosie Chance
D325	C041	D325_C041_450	16.0052	-23.6848	450		440.801		Chance, unpublished	Chance 2014	Rosie Chance
D325	D063	D325_D063_450	17.681	-22.8692	450	5.49	412.866	418.356	Chance, unpublished	Chance 2014	Rosie Chance
D325	E086	D325_E086_450	20.6908	-24.963	450	5.33	401.195	406.525	Chance, unpublished	Chance 2014	Rosie Chance
ET1980	Antarctic1	ET1980_Antarctic1_2	-56.85	-31.3	2	10	440	450	Elderfield&Truesdale, 1980	Chance 2014	Table 1
ET1980	Panama1	ET1980_Panama1_2	5.26167	-79.7417	2	140	280	420	Elderfield&Truesdale, 1980	Chance 2014	Table 1
ET1980	Panama2	ET1980_Panama2_2	4.605	-82.01	2	130	300	430	Elderfield&Truesdale, 1980	Chance 2014	Table 1
ET1980	EqPacific1	ET1980_EqPacific1_2	0.806667	-86.2167	2	120	320	440	Elderfield&Truesdale, 1980	Chance 2014	Table 1
ET1980	EqPacific2	ET1980_EqPacific2_2	-4.42167	-106.8	2	80	360	440	Elderfield&Truesdale, 1980	Chance 2014	Table 1
ET1980	EqPacific3	ET1980_EqPacific3_2	-6.15833	-106.913	2	90	350	440	Elderfield&Truesdale, 1980	Chance 2014	Table 1
ET1980	EqPacific4	ET1980_EqPacific4_2	-7.84167	-105.497	2	90	350	440	Elderfield&Truesdale, 1980	Chance 2014	Table 1
ET1980	EqPacific5	ET1980_EqPacific5_2	-9.445	-103.305	2	110	350	460	Elderfield&Truesdale, 1980	Chance 2014	Table 1
ET1980	SubtropicPacific1	ET1980_SubtropicPacific1_2	-11.4617	-85.87	2	210	230	440	Elderfield&Truesdale, 1980	Chance 2014	Table 1
ET1980	TempAtlantic1	ET1980_TempAtlantic1_2	52.2167	-30.9167	2	20	410	430	Elderfield&Truesdale, 1980	Chance 2014	Table 1
ET1980	TempAtlantic2	ET1980_TempAtlantic2_2	52.5	-17.7167	2	40	400	440	Elderfield&Truesdale, 1980	Chance 2014	Table 1
ET1980	TempAtlantic3	ET1980_TempAtlantic3_2	46.1833	-16.9833	2	40	400	440	Elderfield&Truesdale, 1980	Chance 2014	Table 1
ET1980	SubtropicAtlantic1	ET1980_SubtropicAtlantic1_2	35.8267	-13.1533	2	70	370	440	Elderfield&Truesdale, 1980	Chance 2014	Table 1
SKAG	21	SKAG_21_1	58.37	8.9	0	170			Truesdale, V. W., Danielssen, D. S. & Waite, T. J. Summer and winter distributions of dissolved iodine in the Skagerrak. Estuar. Coast. Shelf Sci. 57, 701-713 (2003).	Chance 2014	Iodide from table 1 (summer data)
SKAG	22	SKAG_22_1	58.3	8.99	0				Truesdale et al., 2003	Chance 2014
SKAG	23	SKAG_23_1	58.25	9.05	0	700			Truesdale, V. W., Danielssen, D. S. & Waite, T. J. Summer and winter distributions of dissolved iodine in the Skagerrak. Estuar. Coast. Shelf Sci. 57, 701-713 (2003).	Chance 2014	Iodide from table 1 (summer data)
SKAG	24	SKAG_24_1	58.15	9.2	0				Truesdale et al., 2003	Chance 2014
SKAG	25	SKAG_25_1	58.1	9.3	0	360			Truesdale, V. W., Danielssen, D. S. & Waite, T. J. Summer and winter distributions of dissolved iodine in the Skagerrak. Estuar. Coast. Shelf Sci. 57, 701-713 (2003).	Chance 2014	Iodide from table 1 (summer data)
SKAG	26	SKAG_26_1	58	9.4	0				Truesdale et al., 2003	Chance 2014
SKAG	27	SKAG_27_1	57.9	9.6	0	450			Truesdale, V. W., Danielssen, D. S. & Waite, T. J. Summer and winter distributions of dissolved iodine in the Skagerrak. Estuar. Coast. Shelf Sci. 57, 701-713 (2003).	Chance 2014	Iodide from table 1 (summer data)
SKAG	28	SKAG_28_1	57.35	9.7	0	330			Truesdale, V. W., Danielssen, D. S. & Waite, T. J. Summer and winter distributions of dissolved iodine in the Skagerrak. Estuar. Coast. Shelf Sci. 57, 701-713 (2003).	Chance 2014	Iodide from table 1 (summer data)
SKAG	29	SKAG_29_1	57.25	9.8	0	240			Truesdale, V. W., Danielssen, D. S. & Waite, T. J. Summer and winter distributions of dissolved iodine in the Skagerrak. Estuar. Coast. Shelf Sci. 57, 701-713 (2003).	Chance 2014	Iodide from table 1 (summer data)
SKAG	30	SKAG_30_1	57.2	9.85	0				Truesdale et al., 2003	Chance 2014
SKAG	31	SKAG_31_1	57.15	9.9	0	280			Truesdale, V. W., Danielssen, D. S. & Waite, T. J. Summer and winter distributions of dissolved iodine in the Skagerrak. Estuar. Coast. Shelf Sci. 57, 701-713 (2003).	Chance 2014	Iodide from table 1 (summer data)
SKAG	32	SKAG_32_1	57.1	9.95	0	400			Truesdale, V. W., Danielssen, D. S. & Waite, T. J. Summer and winter distributions of dissolved iodine in the Skagerrak. Estuar. Coast. Shelf Sci. 57, 701-713 (2003).	Chance 2014	Iodide from table 1 (summer data)
SKAG	21	SKAG_21_1	58.37	8.9	0				Truesdale et al., 2003	Chance 2014
SKAG	22	SKAG_22_1	58.3	8.99	0	160			Truesdale, V. W., Danielssen, D. S. & Waite, T. J. Summer and winter distributions of dissolved iodine in the Skagerrak. Estuar. Coast. Shelf Sci. 57, 701-713 (2003).	Chance 2014	Iodide from table 1 (winter data)
SKAG	23	SKAG_23_1	58.25	9.05	0	280			Truesdale, V. W., Danielssen, D. S. & Waite, T. J. Summer and winter distributions of dissolved iodine in the Skagerrak. Estuar. Coast. Shelf Sci. 57, 701-713 (2003).	Chance 2014	Iodide from table 1 (winter data)
SKAG	24	SKAG_24_1	58.15	9.2	0	230			Truesdale, V. W., Danielssen, D. S. & Waite, T. J. Summer and winter distributions of dissolved iodine in the Skagerrak. Estuar. Coast. Shelf Sci. 57, 701-713 (2003).	Chance 2014	Iodide from table 1 (winter data)
SKAG	25	SKAG_25_1	58.1	9.3	0	210			Truesdale, V. W., Danielssen, D. S. & Waite, T. J. Summer and winter distributions of dissolved iodine in the Skagerrak. Estuar. Coast. Shelf Sci. 57, 701-713 (2003).	Chance 2014	Iodide from table 1 (winter data)
SKAG	26	SKAG_26_1	58	9.4	0	220			Truesdale, V. W., Danielssen, D. S. & Waite, T. J. Summer and winter distributions of dissolved iodine in the Skagerrak. Estuar. Coast. Shelf Sci. 57, 701-713 (2003).	Chance 2014	Iodide from table 1 (winter data)
SKAG	27	SKAG_27_1	57.9	9.6	0	180			Truesdale, V. W., Danielssen, D. S. & Waite, T. J. Summer and winter distributions of dissolved iodine in the Skagerrak. Estuar. Coast. Shelf Sci. 57, 701-713 (2003).	Chance 2014	Iodide from table 1 (winter data)
SKAG	28	SKAG_28_1	57.35	9.7	0	140			Truesdale, V. W., Danielssen, D. S. & Waite, T. J. Summer and winter distributions of dissolved iodine in the Skagerrak. Estuar. Coast. Shelf Sci. 57, 701-713 (2003).	Chance 2014	Iodide from table 1 (winter data)
SKAG	29	SKAG_29_1	57.25	9.8	0	240			Truesdale, V. W., Danielssen, D. S. & Waite, T. J. Summer and winter distributions of dissolved iodine in the Skagerrak. Estuar. Coast. Shelf Sci. 57, 701-713 (2003).	Chance 2014	Iodide from table 1 (winter data)
SKAG	30	SKAG_30_1	57.2	9.85	0	190			Truesdale, V. W., Danielssen, D. S. & Waite, T. J. Summer and winter distributions of dissolved iodine in the Skagerrak. Estuar. Coast. Shelf Sci. 57, 701-713 (2003).	Chance 2014	Iodide from table 1 (winter data)
SKAG	31	SKAG_31_1	57.15	9.9	0	400			Truesdale, V. W., Danielssen, D. S. & Waite, T. J. Summer and winter distributions of dissolved iodine in the Skagerrak. Estuar. Coast. Shelf Sci. 57, 701-713 (2003).	Chance 2014	Iodide from table 1 (winter data)
SKAG	32	SKAG_32_1	57.1	9.95	0	190			Truesdale, V. W., Danielssen, D. S. & Waite, T. J. Summer and winter distributions of dissolved iodine in the Skagerrak. Estuar. Coast. Shelf Sci. 57, 701-713 (2003).	Chance 2014	Iodide from table 1 (winter data)
SKAG	26		58.1	9.3	0	120			Truesdale, V. W., Danielssen, D. S. & Waite, T. J. Summer and winter distributions of dissolved iodine in the Skagerrak. Estuar. Coast. Shelf Sci. 57, 701-713 (2003).		Iodide from figure 5 at "deepest station"
SKAG	26		58.1	9.3	10	110			Truesdale, V. W., Danielssen, D. S. & Waite, T. J. Summer and winter distributions of dissolved iodine in the Skagerrak. Estuar. Coast. Shelf Sci. 57, 701-713 (2003).		Iodide from figure 5 at "deepest station"
SKAG	26		58.1	9.3	20	50			Truesdale, V. W., Danielssen, D. S. & Waite, T. J. Summer and winter distributions of dissolved iodine in the Skagerrak. Estuar. Coast. Shelf Sci. 57, 701-713 (2003).		Iodide from figure 5 at "deepest station"
SKAG	26		58.1	9.3	30	70			Truesdale, V. W., Danielssen, D. S. & Waite, T. J. Summer and winter distributions of dissolved iodine in the Skagerrak. Estuar. Coast. Shelf Sci. 57, 701-713 (2003).		Iodide from figure 5 at "deepest station"
SKAG	26		58.1	9.3	50	16			Truesdale, V. W., Danielssen, D. S. & Waite, T. J. Summer and winter distributions of dissolved iodine in the Skagerrak. Estuar. Coast. Shelf Sci. 57, 701-713 (2003).		Iodide from figure 5 at "deepest station"
SKAG	26		58.1	9.3	100	13			Truesdale, V. W., Danielssen, D. S. & Waite, T. J. Summer and winter distributions of dissolved iodine in the Skagerrak. Estuar. Coast. Shelf Sci. 57, 701-713 (2003).		Iodide from figure 5 at "deepest station"
SKAG	26		58.1	9.3	200	40			Truesdale, V. W., Danielssen, D. S. & Waite, T. J. Summer and winter distributions of dissolved iodine in the Skagerrak. Estuar. Coast. Shelf Sci. 57, 701-713 (2003).		Iodide from figure 5 at "deepest station"
SKAG	26		58.1	9.3	300	27			Truesdale, V. W., Danielssen, D. S. & Waite, T. J. Summer and winter distributions of dissolved iodine in the Skagerrak. Estuar. Coast. Shelf Sci. 57, 701-713 (2003).		Iodide from figure 5 at "deepest station"
SKAG	26		58.1	9.3	400	24			Truesdale, V. W., Danielssen, D. S. & Waite, T. J. Summer and winter distributions of dissolved iodine in the Skagerrak. Estuar. Coast. Shelf Sci. 57, 701-713 (2003).		Iodide from figure 5 at "deepest station"
SKAG	26		58.1	9.3	500	27			Truesdale, V. W., Danielssen, D. S. & Waite, T. J. Summer and winter distributions of dissolved iodine in the Skagerrak. Estuar. Coast. Shelf Sci. 57, 701-713 (2003).		Iodide from figure 5 at "deepest station"
SKAG	26		58.1	9.3	600	40			Truesdale, V. W., Danielssen, D. S. & Waite, T. J. Summer and winter distributions of dissolved iodine in the Skagerrak. Estuar. Coast. Shelf Sci. 57, 701-713 (2003).		Iodide from figure 5 at "deepest station"
SKAG	26		58.1	9.3	630	22			Truesdale, V. W., Danielssen, D. S. & Waite, T. J. Summer and winter distributions of dissolved iodine in the Skagerrak. Estuar. Coast. Shelf Sci. 57, 701-713 (2003).		Iodide from figure 5 at "deepest station"
SKAG	26		58.1	9.3	0	220			Truesdale, V. W., Danielssen, D. S. & Waite, T. J. Summer and winter distributions of dissolved iodine in the Skagerrak. Estuar. Coast. Shelf Sci. 57, 701-713 (2003).		Iodide from figure 5 at "deepest station"
SKAG	26		58.1	9.3	5	150			Truesdale, V. W., Danielssen, D. S. & Waite, T. J. Summer and winter distributions of dissolved iodine in the Skagerrak. Estuar. Coast. Shelf Sci. 57, 701-713 (2003).		Iodide from figure 5 at "deepest station"
SKAG	26		58.1	9.3	10	170			Truesdale, V. W., Danielssen, D. S. & Waite, T. J. Summer and winter distributions of dissolved iodine in the Skagerrak. Estuar. Coast. Shelf Sci. 57, 701-713 (2003).		Iodide from figure 5 at "deepest station"
SKAG	26		58.1	9.3	20	180			Truesdale, V. W., Danielssen, D. S. & Waite, T. J. Summer and winter distributions of dissolved iodine in the Skagerrak. Estuar. Coast. Shelf Sci. 57, 701-713 (2003).		Iodide from figure 5 at "deepest station"
SKAG	26		58.1	9.3	30	140			Truesdale, V. W., Danielssen, D. S. & Waite, T. J. Summer and winter distributions of dissolved iodine in the Skagerrak. Estuar. Coast. Shelf Sci. 57, 701-713 (2003).		Iodide from figure 5 at "deepest station"
SKAG	26		58.1	9.3	50	160			Truesdale, V. W., Danielssen, D. S. & Waite, T. J. Summer and winter distributions of dissolved iodine in the Skagerrak. Estuar. Coast. Shelf Sci. 57, 701-713 (2003).		Iodide from figure 5 at "deepest station"
SKAG	26		58.1	9.3	100	85			Truesdale, V. W., Danielssen, D. S. & Waite, T. J. Summer and winter distributions of dissolved iodine in the Skagerrak. Estuar. Coast. Shelf Sci. 57, 701-713 (2003).		Iodide from figure 5 at "deepest station"
SKAG	26		58.1	9.3	200	27			Truesdale, V. W., Danielssen, D. S. & Waite, T. J. Summer and winter distributions of dissolved iodine in the Skagerrak. Estuar. Coast. Shelf Sci. 57, 701-713 (2003).		Iodide from figure 5 at "deepest station"
SKAG	26		58.1	9.3	300	22			Truesdale, V. W., Danielssen, D. S. & Waite, T. J. Summer and winter distributions of dissolved iodine in the Skagerrak. Estuar. Coast. Shelf Sci. 57, 701-713 (2003).		Iodide from figure 5 at "deepest station"
SKAG	26		58.1	9.3	400	24			Truesdale, V. W., Danielssen, D. S. & Waite, T. J. Summer and winter distributions of dissolved iodine in the Skagerrak. Estuar. Coast. Shelf Sci. 57, 701-713 (2003).		Iodide from figure 5 at "deepest station"
SKAG	26		58.1	9.3	500	16			Truesdale, V. W., Danielssen, D. S. & Waite, T. J. Summer and winter distributions of dissolved iodine in the Skagerrak. Estuar. Coast. Shelf Sci. 57, 701-713 (2003).		Iodide from figure 5 at "deepest station"
SKAG	26		58.1	9.3	600	27			Truesdale, V. W., Danielssen, D. S. & Waite, T. J. Summer and winter distributions of dissolved iodine in the Skagerrak. Estuar. Coast. Shelf Sci. 57, 701-713 (2003).		Iodide from figure 5 at "deepest station"
SKAG	26		58.1	9.3	630	22			Truesdale, V. W., Danielssen, D. S. & Waite, T. J. Summer and winter distributions of dissolved iodine in the Skagerrak. Estuar. Coast. Shelf Sci. 57, 701-713 (2003).		Iodide from figure 5 at "deepest station"
AMT-3	1	AMT-3_1_3	47.7612	-17.7358	3	19.4558	423.163	442.619	Truesdale, V. W., Bale, A. J. & Woodward, E. M. S. The meridional distribution of dissolved iodine in near-surface waters of the Atlantic Ocean. Prog. Oceanogr. 45, 387-400 (2000).	Chance 2014	Figure 3
AMT-3	2	AMT-3_2_3	42.5373	-20	3	48.8435	395.633	444.476	Truesdale, V. W., Bale, A. J. & Woodward, E. M. S. The meridional distribution of dissolved iodine in near-surface waters of the Atlantic Ocean. Prog. Oceanogr. 45, 387-400 (2000).	Chance 2014	Figure 3
AMT-3	3	AMT-3_3_3	38.5075	-20	3	19.7279	429.082	448.81	Truesdale, V. W., Bale, A. J. & Woodward, E. M. S. The meridional distribution of dissolved iodine in near-surface waters of the Atlantic Ocean. Prog. Oceanogr. 45, 387-400 (2000).	Chance 2014	Figure 3
AMT-3	4	AMT-3_4_3	29.2537	-22.2642	3	65.3537	392.122	457.476	Truesdale, V. W., Bale, A. J. & Woodward, E. M. S. The meridional distribution of dissolved iodine in near-surface waters of the Atlantic Ocean. Prog. Oceanogr. 45, 387-400 (2000).	Chance 2014	Figure 3
AMT-3	5	AMT-3_5_3	24.7761	-21.5094	3	68.8435	386.776	455.619	Truesdale, V. W., Bale, A. J. & Woodward, E. M. S. The meridional distribution of dissolved iodine in near-surface waters of the Atlantic Ocean. Prog. Oceanogr. 45, 387-400 (2000).	Chance 2014	Figure 3
AMT-3	6	AMT-3_6_3	12.9104	-20.7547	3	126.786	278.929	405.714	Truesdale, V. W., Bale, A. J. & Woodward, E. M. S. The meridional distribution of dissolved iodine in near-surface waters of the Atlantic Ocean. Prog. Oceanogr. 45, 387-400 (2000).	Chance 2014	Figure 3
AMT-3	7	AMT-3_7_3	9.25373	-22.6415	3	108.061	295.367	403.429	Truesdale, V. W., Bale, A. J. & Woodward, E. M. S. The meridional distribution of dissolved iodine in near-surface waters of the Atlantic Ocean. Prog. Oceanogr. 45, 387-400 (2000).	Chance 2014	Figure 3
AMT-3	8	AMT-3_8_3	6.26866	-24.1509	3	133.137	265.796	398.933	Truesdale, V. W., Bale, A. J. & Woodward, E. M. S. The meridional distribution of dissolved iodine in near-surface waters of the Atlantic Ocean. Prog. Oceanogr. 45, 387-400 (2000).	Chance 2014	Figure 3
AMT-3	9	AMT-3_9_3	4.02985	-24.5283	3	102.008	280.163	382.171	Truesdale, V. W., Bale, A. J. & Woodward, E. M. S. The meridional distribution of dissolved iodine in near-surface waters of the Atlantic Ocean. Prog. Oceanogr. 45, 387-400 (2000).	Chance 2014	Figure 3
AMT-3	10	AMT-3_10_3	2.53731	-25.6604	3	116.492	304.051	420.543	Truesdale, V. W., Bale, A. J. & Woodward, E. M. S. The meridional distribution of dissolved iodine in near-surface waters of the Atlantic Ocean. Prog. Oceanogr. 45, 387-400 (2000).	Chance 2014	Figure 3
AMT-3	11	AMT-3_11_3	-1.86567	-27.1698	3	115.354	318.26	433.614	Truesdale, V. W., Bale, A. J. & Woodward, E. M. S. The meridional distribution of dissolved iodine in near-surface waters of the Atlantic Ocean. Prog. Oceanogr. 45, 387-400 (2000).	Chance 2014	Figure 3
AMT-3	12	AMT-3_12_3	-4.47761	-27.9245	3	122.687	323.894	446.581	Truesdale, V. W., Bale, A. J. & Woodward, E. M. S. The meridional distribution of dissolved iodine in near-surface waters of the Atlantic Ocean. Prog. Oceanogr. 45, 387-400 (2000).	Chance 2014	Figure 3
AMT-3	13	AMT-3_13_3	-6.71642	-29.0566	3	105.253	331.99	437.243	Truesdale, V. W., Bale, A. J. & Woodward, E. M. S. The meridional distribution of dissolved iodine in near-surface waters of the Atlantic Ocean. Prog. Oceanogr. 45, 387-400 (2000).	Chance 2014	Figure 3
AMT-3	14	AMT-3_14_3	-8.95522	-7.54717	3	149.808	305.073	454.882	Truesdale, V. W., Bale, A. J. & Woodward, E. M. S. The meridional distribution of dissolved iodine in near-surface waters of the Atlantic Ocean. Prog. Oceanogr. 45, 387-400 (2000).	Chance 2014	Figure 3
AMT-3	15	AMT-3_15_3	-11.1194	-31.3208	3	154.08	306.663	460.743	Truesdale, V. W., Bale, A. J. & Woodward, E. M. S. The meridional distribution of dissolved iodine in near-surface waters of the Atlantic Ocean. Prog. Oceanogr. 45, 387-400 (2000).	Chance 2014	Figure 3
AMT-3	16	AMT-3_16_3	-12.9851	-32.0755	3	113.404	349.224	462.629	Truesdale, V. W., Bale, A. J. & Woodward, E. M. S. The meridional distribution of dissolved iodine in near-surface waters of the Atlantic Ocean. Prog. Oceanogr. 45, 387-400 (2000).	Chance 2014	Figure 3
AMT-3	17	AMT-3_17_3	-14.8507	-33.5849	3	117.478	346.408	463.886	Truesdale, V. W., Bale, A. J. & Woodward, E. M. S. The meridional distribution of dissolved iodine in near-surface waters of the Atlantic Ocean. Prog. Oceanogr. 45, 387-400 (2000).	Chance 2014	Figure 3
AMT-3	18	AMT-3_18_3	-16.7164	-33.9623	3	125.008	338.878	463.886	Truesdale, V. W., Bale, A. J. & Woodward, E. M. S. The meridional distribution of dissolved iodine in near-surface waters of the Atlantic Ocean. Prog. Oceanogr. 45, 387-400 (2000).	Chance 2014	Figure 3
AMT-3	19	AMT-3_19_3	-18.9552	-35.4717	3	121.745	335.112	456.857	Truesdale, V. W., Bale, A. J. & Woodward, E. M. S. The meridional distribution of dissolved iodine in near-surface waters of the Atlantic Ocean. Prog. Oceanogr. 45, 387-400 (2000).	Chance 2014	Figure 3
AMT-3	20	AMT-3_20_3	-20.7463	-36.2264	3	102.779	353.459	456.238	Truesdale, V. W., Bale, A. J. & Woodward, E. M. S. The meridional distribution of dissolved iodine in near-surface waters of the Atlantic Ocean. Prog. Oceanogr. 45, 387-400 (2000).	Chance 2014	Figure 3
AMT-3	21	AMT-3_21_3	-22.2388	-36.9811	3	110	345	455	Truesdale, V. W., Bale, A. J. & Woodward, E. M. S. The meridional distribution of dissolved iodine in near-surface waters of the Atlantic Ocean. Prog. Oceanogr. 45, 387-400 (2000).	Chance 2014	Figure 3
AMT-3	22	AMT-3_22_3	-24.1045	-37.3585	3	98.232	359.02	457.252	Truesdale, V. W., Bale, A. J. & Woodward, E. M. S. The meridional distribution of dissolved iodine in near-surface waters of the Atlantic Ocean. Prog. Oceanogr. 45, 387-400 (2000).	Chance 2014	Figure 3
AMT-3	23	AMT-3_23_3	-25.9701	-38.4906	3	94.7724	349.814	444.587	Truesdale, V. W., Bale, A. J. & Woodward, E. M. S. The meridional distribution of dissolved iodine in near-surface waters of the Atlantic Ocean. Prog. Oceanogr. 45, 387-400 (2000).	Chance 2014	Figure 3
AMT-3	24	AMT-3_24_3	-28.209	-40	3	76.0571	363	439.057	Truesdale, V. W., Bale, A. J. & Woodward, E. M. S. The meridional distribution of dissolved iodine in near-surface waters of the Atlantic Ocean. Prog. Oceanogr. 45, 387-400 (2000).	Chance 2014	Figure 3
AMT-3	25	AMT-3_25_3	-30.7463	-45.283	3	69.1031	357.811	426.914	Truesdale, V. W., Bale, A. J. & Woodward, E. M. S. The meridional distribution of dissolved iodine in near-surface waters of the Atlantic Ocean. Prog. Oceanogr. 45, 387-400 (2000).	Chance 2014	Figure 3
AMT-3	26	AMT-3_26_3	-32.6119	-46.4151	3	74.9388	367.347	442.286	Truesdale, V. W., Bale, A. J. & Woodward, E. M. S. The meridional distribution of dissolved iodine in near-surface waters of the Atlantic Ocean. Prog. Oceanogr. 45, 387-400 (2000).	Chance 2014	Figure 3
AMT-3	27	AMT-3_27_3	-34.4776	-47.9245	3	62.7639	340.684	403.448	Truesdale, V. W., Bale, A. J. & Woodward, E. M. S. The meridional distribution of dissolved iodine in near-surface waters of the Atlantic Ocean. Prog. Oceanogr. 45, 387-400 (2000).	Chance 2014	Figure 3
AMT-3	28	AMT-3_28_3	-35.9701	-49.8113	3	39.1	382.5	421.6	Truesdale, V. W., Bale, A. J. & Woodward, E. M. S. The meridional distribution of dissolved iodine in near-surface waters of the Atlantic Ocean. Prog. Oceanogr. 45, 387-400 (2000).	Chance 2014	Figure 3
AMT-3	29	AMT-3_29_3	-37.8358	-52.0755	3	27.8558	389.02	416.876	Truesdale, V. W., Bale, A. J. & Woodward, E. M. S. The meridional distribution of dissolved iodine in near-surface waters of the Atlantic Ocean. Prog. Oceanogr. 45, 387-400 (2000).	Chance 2014	Figure 3
AMT-3	30	AMT-3_30_3	-40	-55.0943	3	16.6667	400	416.667	Truesdale, V. W., Bale, A. J. & Woodward, E. M. S. The meridional distribution of dissolved iodine in near-surface waters of the Atlantic Ocean. Prog. Oceanogr. 45, 387-400 (2000).	Chance 2014	Figure 3
AMT-3	31	AMT-3_31_3	-41.4925	-55.0943	3		428.439	416.4	Truesdale, V. W., Bale, A. J. & Woodward, E. M. S. The meridional distribution of dissolved iodine in near-surface waters of the Atlantic Ocean. Prog. Oceanogr. 45, 387-400 (2000).	Chance 2014	Figure 3
AMT-3	32	AMT-3_32_3	-43.7313	-55.0943	3	2.57415	403.673	406.248	Truesdale, V. W., Bale, A. J. & Woodward, E. M. S. The meridional distribution of dissolved iodine in near-surface waters of the Atlantic Ocean. Prog. Oceanogr. 45, 387-400 (2000).	Chance 2014	Figure 3
AMT-3	33	AMT-3_33_3	-45.2239	-55.0943	3		414.679	400.043	Truesdale, V. W., Bale, A. J. & Woodward, E. M. S. The meridional distribution of dissolved iodine in near-surface waters of the Atlantic Ocean. Prog. Oceanogr. 45, 387-400 (2000).	Chance 2014	Figure 3
AMT-3	34	AMT-3_34_3	-47.0896	-55.8491	3		421.648	413.052	Truesdale, V. W., Bale, A. J. & Woodward, E. M. S. The meridional distribution of dissolved iodine in near-surface waters of the Atlantic Ocean. Prog. Oceanogr. 45, 387-400 (2000).	Chance 2014	Figure 3
AMT-3	35	AMT-3_35_3	-48.209	-56.2264	3		446.041	413.052	Truesdale, V. W., Bale, A. J. & Woodward, E. M. S. The meridional distribution of dissolved iodine in near-surface waters of the Atlantic Ocean. Prog. Oceanogr. 45, 387-400 (2000).	Chance 2014	Figure 3
AMT-3	36	AMT-3_36_3	-49.3284	-56.6038	3		421.648	413.052	Truesdale, V. W., Bale, A. J. & Woodward, E. M. S. The meridional distribution of dissolved iodine in near-surface waters of the Atlantic Ocean. Prog. Oceanogr. 45, 387-400 (2000).	Chance 2014	Figure 3
AMT-3	37	AMT-3_37_3	-51.1194	-57.7358	3		414.679	413.052	Truesdale, V. W., Bale, A. J. & Woodward, E. M. S. The meridional distribution of dissolved iodine in near-surface waters of the Atlantic Ocean. Prog. Oceanogr. 45, 387-400 (2000).	Chance 2014	Figure 3
AMT-3	38	AMT-3_38_3	-52.2388	-58.1132	3	19.5143	390.286	409.8	Truesdale, V. W., Bale, A. J. & Woodward, E. M. S. The meridional distribution of dissolved iodine in near-surface waters of the Atlantic Ocean. Prog. Oceanogr. 45, 387-400 (2000).	Chance 2014	Figure 3
AMT-4	1	AMT-4_1_3	50	-3.01887	3	78.3551	348.245	426.6	Truesdale, V. W., Bale, A. J. & Woodward, E. M. S. The meridional distribution of dissolved iodine in near-surface waters of the Atlantic Ocean. Prog. Oceanogr. 45, 387-400 (2000).	Chance 2014	Figure 3
AMT-4	2	AMT-4_2_3	40	-20	3	20.6	412	432.6	Truesdale, V. W., Bale, A. J. & Woodward, E. M. S. The meridional distribution of dissolved iodine in near-surface waters of the Atlantic Ocean. Prog. Oceanogr. 45, 387-400 (2000).	Chance 2014	Figure 3
AMT-4	3	AMT-4_3_3	30	-21.5094	3	54.5741	390.531	445.105	Truesdale, V. W., Bale, A. J. & Woodward, E. M. S. The meridional distribution of dissolved iodine in near-surface waters of the Atlantic Ocean. Prog. Oceanogr. 45, 387-400 (2000).	Chance 2014	Figure 3
AMT-4	4	AMT-4_4_3	20	-21.1321	3	114.282	324.918	439.2	Truesdale, V. W., Bale, A. J. & Woodward, E. M. S. The meridional distribution of dissolved iodine in near-surface waters of the Atlantic Ocean. Prog. Oceanogr. 45, 387-400 (2000).	Chance 2014	Figure 3
AMT-4	5	AMT-4_5_3	10	-21.8868	3	102.367	315.918	418.286	Truesdale, V. W., Bale, A. J. & Woodward, E. M. S. The meridional distribution of dissolved iodine in near-surface waters of the Atlantic Ocean. Prog. Oceanogr. 45, 387-400 (2000).	Chance 2014	Figure 3
AMT-4	6	AMT-4_6_3	0	-26.4151	3	101.106	329.694	430.8	Truesdale, V. W., Bale, A. J. & Woodward, E. M. S. The meridional distribution of dissolved iodine in near-surface waters of the Atlantic Ocean. Prog. Oceanogr. 45, 387-400 (2000).	Chance 2014	Figure 3
AMT-4	7	AMT-4_7_3	-10	-30.9434	3	118.016	321.184	439.2	Truesdale, V. W., Bale, A. J. & Woodward, E. M. S. The meridional distribution of dissolved iodine in near-surface waters of the Atlantic Ocean. Prog. Oceanogr. 45, 387-400 (2000).	Chance 2014	Figure 3
AMT-4	8	AMT-4_8_3	-20	-35.4717	3	126.857	317.143	444	Truesdale, V. W., Bale, A. J. & Woodward, E. M. S. The meridional distribution of dissolved iodine in near-surface waters of the Atlantic Ocean. Prog. Oceanogr. 45, 387-400 (2000).	Chance 2014	Figure 3
AMT-4	9	AMT-4_9_3	-30	-43.0189	3	77.0095	352.857	429.867	Truesdale, V. W., Bale, A. J. & Woodward, E. M. S. The meridional distribution of dissolved iodine in near-surface waters of the Atlantic Ocean. Prog. Oceanogr. 45, 387-400 (2000).	Chance 2014	Figure 3
AMT-4	10	AMT-4_10_3	-40	-55.4717	3	7.25442	431.755	439.01	Truesdale, V. W., Bale, A. J. & Woodward, E. M. S. The meridional distribution of dissolved iodine in near-surface waters of the Atlantic Ocean. Prog. Oceanogr. 45, 387-400 (2000).	Chance 2014	Figure 3
AMT-4	11	AMT-4_11_3	-50	-57.3585	3		439.714	429.943	Truesdale, V. W., Bale, A. J. & Woodward, E. M. S. The meridional distribution of dissolved iodine in near-surface waters of the Atlantic Ocean. Prog. Oceanogr. 45, 387-400 (2000).	Chance 2014	Figure 3
AMT-3			47.5122		3		423.458		Truesdale et al. 2000		Figure 3
AMT-3			42.6093		3		380.564		Truesdale et al. 2000		Figure 3
AMT-3			38.0279		3		436.98		Truesdale et al. 2000		Figure 3
AMT-3			29.4277		3		351.12		Truesdale et al. 2000		Figure 3
AMT-3			24.6052		3		347.089		Truesdale et al. 2000		Figure 3
AMT-3			12.4685		3		162.11		Truesdale et al. 2000		Figure 3
AMT-3			9.1731		3		205.494		Truesdale et al. 2000		Figure 3
AMT-3			5.79733		3		142.355		Truesdale et al. 2000		Figure 3
AMT-3			5.07395		3		148.156		Truesdale et al. 2000		Figure 3
AMT-3			5.07395		3		161.112		Truesdale et al. 2000		Figure 3
AMT-3			4.67207		3		168.334		Truesdale et al. 2000		Figure 3
AMT-3			3.62719		3		172.715		Truesdale et al. 2000		Figure 3
AMT-3			2.42155		3		198.699		Truesdale et al. 2000		Figure 3
AMT-3			2.2608		3		194.39		Truesdale et al. 2000		Figure 3
AMT-3			1.05517		3		195.902		Truesdale et al. 2000		Figure 3
AMT-3			1.6178		3		208.824		Truesdale et al. 2000		Figure 3
AMT-3			0.572917		3		207.447		Truesdale et al. 2000		Figure 3
AMT-3			0.894419		3		226.142		Truesdale et al. 2000		Figure 3
AMT-3			0.251415		3		249.213		Truesdale et al. 2000		Figure 3
AMT-3			-1.43647		3		232.039		Truesdale et al. 2000		Figure 3
AMT-3			-2.15985		3		232.083		Truesdale et al. 2000		Figure 3
AMT-3			-2.56173		3		230.667		Truesdale et al. 2000		Figure 3
AMT-3			-2.3206		3		240.73		Truesdale et al. 2000		Figure 3
AMT-3			-3.12436		3		250.854		Truesdale et al. 2000		Figure 3
AMT-3			-3.76736		3		224.981		Truesdale et al. 2000		Figure 3
AMT-3			-4.57112		3		237.985		Truesdale et al. 2000		Figure 3
AMT-3			-5.13374		3		233.7		Truesdale et al. 2000		Figure 3
AMT-3			-6.01788		3		222.236		Truesdale et al. 2000		Figure 3
AMT-3			-6.66088		3		238.11		Truesdale et al. 2000		Figure 3
AMT-3			-6.5805		3		252.5		Truesdale et al. 2000		Figure 3
AMT-3			-7.38426		3		205.043		Truesdale et al. 2000		Figure 3
AMT-3			-8.02726		3		246.829		Truesdale et al. 2000		Figure 3
AMT-3			-8.67027		3		193.603		Truesdale et al. 2000		Figure 3
AMT-3			-9.39365		3		244.031		Truesdale et al. 2000		Figure 3
AMT-3			-9.95628		3		192.24		Truesdale et al. 2000		Figure 3
AMT-3			-10.9208		3		195.177		Truesdale et al. 2000		Figure 3
AMT-3			-10.76		3		249.871		Truesdale et al. 2000		Figure 3
AMT-3			-11.2423		3		251.339		Truesdale et al. 2000		Figure 3
AMT-3			-11.7245		3		249.928		Truesdale et al. 2000		Figure 3
AMT-3			-12.5283		3		198.152		Truesdale et al. 2000		Figure 3
AMT-3			-13.1713		3		264.41		Truesdale et al. 2000		Figure 3
AMT-3			-13.8947		3		263.014		Truesdale et al. 2000		Figure 3
AMT-3			-14.8592		3		277.467		Truesdale et al. 2000		Figure 3
AMT-3			-14.8365		3		190.852		Truesdale et al. 2000		Figure 3
AMT-3			-15.0691		3		259.179		Truesdale et al. 2000		Figure 3
AMT-3			-15.7668		3		244.225		Truesdale et al. 2000		Figure 3
AMT-3			-16.6505		3		248.443		Truesdale et al. 2000		Figure 3
AMT-3			-17.4412		3		246.824		Truesdale et al. 2000		Figure 3
AMT-3			-18.1855		3		228.541		Truesdale et al. 2000		Figure 3
AMT-3			-19.0227		3		242.753		Truesdale et al. 2000		Figure 3
AMT-3			-19.7204		3		257.79		Truesdale et al. 2000		Figure 3
AMT-3			-20.5111		3		298.658		Truesdale et al. 2000		Figure 3
AMT-3			-21.1623		3		278.703		Truesdale et al. 2000		Figure 3
AMT-3			-21.581		3		258.734		Truesdale et al. 2000		Figure 3
AMT-3			-22.4647		3		265.452		Truesdale et al. 2000		Figure 3
AMT-3			-22.9764		3		211.332		Truesdale et al. 2000		Figure 3
AMT-3			-23.8136		3		263.033		Truesdale et al. 2000		Figure 3
AMT-3			-24.6043		3		289.739		Truesdale et al. 2000		Figure 3
AMT-3			-25.4416		3		276.459		Truesdale et al. 2000		Figure 3
AMT-3			-25.9997		3		272.327		Truesdale et al. 2000		Figure 3
AMT-3			-26.5579		3		265.696		Truesdale et al. 2000		Figure 3
AMT-3			-26.5579		3		288.189		Truesdale et al. 2000		Figure 3
AMT-3			-27.1161		3		273.227		Truesdale et al. 2000		Figure 3
AMT-3			-27.6277		3		305.748		Truesdale et al. 2000		Figure 3
AMT-3			-28.0929		3		299.944		Truesdale et al. 2000		Figure 3
AMT-3			-28.6975		3		293.315		Truesdale et al. 2000		Figure 3
AMT-3			-29.5348		3		242.548		Truesdale et al. 2000		Figure 3
AMT-3			-29.8604		3		292.552		Truesdale et al. 2000		Figure 3
AMT-3			-30.4651		3		289.256		Truesdale et al. 2000		Figure 3
AMT-3			-30.9767		3		280.122		Truesdale et al. 2000		Figure 3
AMT-3			-31.6279		3		280.161		Truesdale et al. 2000		Figure 3
AMT-3			-32.0465		3		264.358		Truesdale et al. 2000		Figure 3
AMT-3			-32.6977		3		289.389		Truesdale et al. 2000		Figure 3
AMT-3			-32.4186		3		296.87		Truesdale et al. 2000		Figure 3
AMT-3			-32.6512		3		317.711		Truesdale et al. 2000		Figure 3
AMT-3			-33.4419		3		316.925		Truesdale et al. 2000		Figure 3
AMT-3			-33.8605		3		296.956		Truesdale et al. 2000		Figure 3
AMT-3			-34.1861		3		272.816		Truesdale et al. 2000		Figure 3
AMT-3			-34.7908		3		238.696		Truesdale et al. 2000		Figure 3
AMT-3			-35.3955		3		356.196		Truesdale et al. 2000		Figure 3
AMT-3			-36.0467		3		352.07		Truesdale et al. 2000		Figure 3
AMT-3			-36.3723		3		337.927		Truesdale et al. 2000		Figure 3
AMT-3			-36.7909		3		298.797		Truesdale et al. 2000		Figure 3
AMT-3			-37.3956		3		319.66		Truesdale et al. 2000		Figure 3
AMT-3			-38.0003		3		345.522		Truesdale et al. 2000		Figure 3
AMT-3			-37.9072		3		368.842		Truesdale et al. 2000		Figure 3
AMT-3			-38.6515		3		416.372		Truesdale et al. 2000		Figure 3
AMT-3			-39.6282		3		402.268		Truesdale et al. 2000		Figure 3
AMT-3			-40.5585		3		446.477		Truesdale et al. 2000		Figure 3
AMT-3			-41.7679		3		456.546		Truesdale et al. 2000		Figure 3
AMT-3			-42.5121		3		442.428		Truesdale et al. 2000		Figure 3
AMT-3			-43.4889		3		412.496		Truesdale et al. 2000		Figure 3
AMT-3			-44.0935		3		412.532		Truesdale et al. 2000		Figure 3
AMT-3			-44.6052		3		416.728		Truesdale et al. 2000		Figure 3
AMT-3			-45.489		3		442.606		Truesdale et al. 2000		Figure 3
AMT-3			-47.0239		3		453.528		Truesdale et al. 2000		Figure 3
AMT-3			-48.0472		3		506.906		Truesdale et al. 2000		Figure 3
AMT-3			-49.4426		3		454.505		Truesdale et al. 2000		Figure 3
AMT-3			-49.4426		3		449.507		Truesdale et al. 2000		Figure 3
AMT-3			-50.1868		3		475.377		Truesdale et al. 2000		Figure 3
AMT-3			-52.0009		3		453.825		Truesdale et al. 2000		Figure 3
AMT-3			-51.2101		3		442.115		Truesdale et al. 2000		Figure 3
AMT-3			-52.0009		3		403.84		Truesdale et al. 2000		Figure 3
AMT-3			46.8598		3			429.288	Truesdale et al. 2000		Figure 3
AMT-3			42.2555		3			428.602	Truesdale et al. 2000		Figure 3
AMT-3			37.7901		3			428.734	Truesdale et al. 2000		Figure 3
AMT-3			29.0932		3			427.348	Truesdale et al. 2000		Figure 3
AMT-3			24.2119		3			424.208	Truesdale et al. 2000		Figure 3
AMT-3			12.4642		3			399.929	Truesdale et al. 2000		Figure 3
AMT-3			8.65138		3			398.399	Truesdale et al. 2000		Figure 3
AMT-3			5.56602		3			361.142	Truesdale et al. 2000		Figure 3
AMT-3			5.1939		3			361.153	Truesdale et al. 2000		Figure 3
AMT-3			4.72704		3			363.219	Truesdale et al. 2000		Figure 3
AMT-3			4.74654		3			395.641	Truesdale et al. 2000		Figure 3
AMT-3			4.20751		3			372.674	Truesdale et al. 2000		Figure 3
AMT-3			3.41266		3			377.622	Truesdale et al. 2000		Figure 3
AMT-3			2.14034		3			397.359	Truesdale et al. 2000		Figure 3
AMT-3			2.13453		3			404.337	Truesdale et al. 2000		Figure 3
AMT-3			1.39098		3			403.538	Truesdale et al. 2000		Figure 3
AMT-3			1.02604		3			394.93	Truesdale et al. 2000		Figure 3
AMT-3			1.10505		3			411.754	Truesdale et al. 2000		Figure 3
AMT-3			0.636137		3			416.283	Truesdale et al. 2000		Figure 3
AMT-3			-0.0605582		3			415.072	Truesdale et al. 2000		Figure 3
AMT-3			0.0895887		3			402.345	Truesdale et al. 2000		Figure 3
AMT-3			-2.33089		3			404.468	Truesdale et al. 2000		Figure 3
AMT-3			-1.78366		3			417.585	Truesdale et al. 2000		Figure 3
AMT-3			-2.53439		3			425.405	Truesdale et al. 2000		Figure 3
AMT-3			-2.85281		3			416.796	Truesdale et al. 2000		Figure 3
AMT-3			-3.36516		3			417.632	Truesdale et al. 2000		Figure 3
AMT-3			-4.16377		3			427.095	Truesdale et al. 2000		Figure 3
AMT-3			-4.81874		3			431.628	Truesdale et al. 2000		Figure 3
AMT-3			-5.7805		3			413.598	Truesdale et al. 2000		Figure 3
AMT-3			-6.10816		3			416.071	Truesdale et al. 2000		Figure 3
AMT-3			-6.57467		3			417.726	Truesdale et al. 2000		Figure 3
AMT-3			-6.99399		3			418.559	Truesdale et al. 2000		Figure 3
AMT-3			-6.95705		3			430.05	Truesdale et al. 2000		Figure 3
AMT-3			-7.5549		3			421.859	Truesdale et al. 2000		Figure 3
AMT-3			-8.34121		3			416.547	Truesdale et al. 2000		Figure 3
AMT-3			-8.90657		3			425.182	Truesdale et al. 2000		Figure 3
AMT-3			-9.69527		3			422.743	Truesdale et al. 2000		Figure 3
AMT-3			-10.3389		3			413.732	Truesdale et al. 2000		Figure 3
AMT-3			-11.2706		3			415.402	Truesdale et al. 2000		Figure 3
AMT-3			-11.8753		3			415.419	Truesdale et al. 2000		Figure 3
AMT-3			-11.0948		3			427.709	Truesdale et al. 2000		Figure 3
AMT-3			-12.862		3			427.35	Truesdale et al. 2000		Figure 3
AMT-3			-13.6107		3			432.708	Truesdale et al. 2000		Figure 3
AMT-3			-14.2113		3			427.8	Truesdale et al. 2000		Figure 3
AMT-3			-14.9073		3			425.769	Truesdale et al. 2000		Figure 3
AMT-3			-15.3752		3			429.066	Truesdale et al. 2000		Figure 3
AMT-3			-16.1605		3			422.522	Truesdale et al. 2000		Figure 3
AMT-3			-17.1503		3			438.147	Truesdale et al. 2000		Figure 3
AMT-3			-17.8436		3			432.832	Truesdale et al. 2000		Figure 3
AMT-3			-18.6747		3			425.469	Truesdale et al. 2000		Figure 3
AMT-3			-19.1425		3			428.766	Truesdale et al. 2000		Figure 3
AMT-3			-19.9747		3			422.635	Truesdale et al. 2000		Figure 3
AMT-3			-20.7637		3			420.606	Truesdale et al. 2000		Figure 3
AMT-3			-21.5121		3			425.553	Truesdale et al. 2000		Figure 3
AMT-3			-22.0183		3			419.001	Truesdale et al. 2000		Figure 3
AMT-3			-22.9937		3			417.388	Truesdale et al. 2000		Figure 3
AMT-3			-23.1852		3			423.96	Truesdale et al. 2000		Figure 3
AMT-3			-24.2503		3			418.246	Truesdale et al. 2000		Figure 3
AMT-3			-25.0048		3			430.58	Truesdale et al. 2000		Figure 3
AMT-3			-25.7329		3			411.312	Truesdale et al. 2000		Figure 3
AMT-3			-26.1598		3			421.175	Truesdale et al. 2000		Figure 3
AMT-3			-26.8558		3			419.143	Truesdale et al. 2000		Figure 3
AMT-3			-26.8503		3			412.576	Truesdale et al. 2000		Figure 3
AMT-3			-27.2594		3			401.097	Truesdale et al. 2000		Figure 3
AMT-3			-27.9619		3			406.863	Truesdale et al. 2000		Figure 3
AMT-3			-28.5153		3			401.134	Truesdale et al. 2000		Figure 3
AMT-3			-29.0882		3			418.798	Truesdale et al. 2000		Figure 3
AMT-3			-29.7322		3			410.199	Truesdale et al. 2000		Figure 3
AMT-3			-30.1984		3			411.444	Truesdale et al. 2000		Figure 3
AMT-3			-30.7883		3			393.813	Truesdale et al. 2000		Figure 3
AMT-3			-31.1293		3			412.292	Truesdale et al. 2000		Figure 3
AMT-3			-31.4987		3			409.019	Truesdale et al. 2000		Figure 3
AMT-3			-32.5703		3			411.103	Truesdale et al. 2000		Figure 3
AMT-3			-32.8138		3			424.243	Truesdale et al. 2000		Figure 3
AMT-3			-33.0399		3			416.452	Truesdale et al. 2000		Figure 3
AMT-3			-33.635		3			404.978	Truesdale et al. 2000		Figure 3
AMT-3			-34.0105		3			409.093	Truesdale et al. 2000		Figure 3
AMT-3			-34.4278		3			407.464	Truesdale et al. 2000		Figure 3
AMT-3			-35.341		3			386.97	Truesdale et al. 2000		Figure 3
AMT-3			-35.7223		3			398.062	Truesdale et al. 2000		Figure 3
AMT-3			-36.4272		3			406.702	Truesdale et al. 2000		Figure 3
AMT-3			-36.7114		3			412.867	Truesdale et al. 2000		Figure 3
AMT-3			-36.9871		3			408.77	Truesdale et al. 2000		Figure 3
AMT-3			-37.6865		3			410.843	Truesdale et al. 2000		Figure 3
AMT-3			-38.243		3			408.807	Truesdale et al. 2000		Figure 3
AMT-3			-38.8884		3			401.849	Truesdale et al. 2000		Figure 3
AMT-3			-38.322		3			391.983	Truesdale et al. 2000		Figure 3
AMT-3			-40.0147		3			413.784	Truesdale et al. 2000		Figure 3
AMT-3			-41.0243		3			397.398	Truesdale et al. 2000		Figure 3
AMT-3			-41.9252		3			417.945	Truesdale et al. 2000		Figure 3
AMT-3			-42.8969		3			411.817	Truesdale et al. 2000		Figure 3
AMT-3			-43.9633		3			407.744	Truesdale et al. 2000		Figure 3
AMT-3			-44.8974		3			412.286	Truesdale et al. 2000		Figure 3
AMT-3			-45.775		3			404.925	Truesdale et al. 2000		Figure 3
AMT-3			-47.4143		3			418.517	Truesdale et al. 2000		Figure 3
AMT-3			-48.2054		3			418.95	Truesdale et al. 2000		Figure 3
AMT-3			-49.0909		3			421.028	Truesdale et al. 2000		Figure 3
AMT-3			-49.9251		3			417.359	Truesdale et al. 2000		Figure 3
AMT-3			-50.6686		3			416.56	Truesdale et al. 2000		Figure 3
AMT-3			-51.4145		3			418.634	Truesdale et al. 2000		Figure 3
AMT-3			-52.3431		3			416.61	Truesdale et al. 2000		Figure 3
AMT-3			-52.1547		3			413.731	Truesdale et al. 2000		Figure 3
AMT-4			50.245		3		387.306		Truesdale et al. 2000		Figure 3
AMT-4			50.0039		3		298.067		Truesdale et al. 2000		Figure 3
AMT-4			19.3004		3		959.219		Truesdale et al. 2000		Figure 3
AMT-4			49.3609		3		328.336		Truesdale et al. 2000		Figure 3
AMT-4			49.2805		3		357.133		Truesdale et al. 2000		Figure 3
AMT-4			48.7178		3		344.21		Truesdale et al. 2000		Figure 3
AMT-4			48.7178		3		390.276		Truesdale et al. 2000		Figure 3
AMT-4			48.3963		3		432.042		Truesdale et al. 2000		Figure 3
AMT-4			47.673		3		422.009		Truesdale et al. 2000		Figure 3
AMT-4			47.7533		3		436.4		Truesdale et al. 2000		Figure 3
AMT-4			46.7085		3		427.825		Truesdale et al. 2000		Figure 3
AMT-4			46.1458		3		419.221		Truesdale et al. 2000		Figure 3
AMT-4			45.744		3		426.443		Truesdale et al. 2000		Figure 3
AMT-4			44.7794		3		413.544		Truesdale et al. 2000		Figure 3
AMT-4			44.2168		3		422.215		Truesdale et al. 2000		Figure 3
AMT-4			42.6897		3		405.032		Truesdale et al. 2000		Figure 3
AMT-4			42.6897		3		389.196		Truesdale et al. 2000		Figure 3
AMT-4			41.6448		3		393.577		Truesdale et al. 2000		Figure 3
AMT-4			40.9214		3		384.983		Truesdale et al. 2000		Figure 3
AMT-4			40.198		3		408.059		Truesdale et al. 2000		Figure 3
AMT-4			36.8223		3		366.514		Truesdale et al. 2000		Figure 3
AMT-4			34.9736		3		388.217		Truesdale et al. 2000		Figure 3
AMT-4			33.6073		3		376.783		Truesdale et al. 2000		Figure 3
AMT-4			32.9642		3		392.656		Truesdale et al. 2000		Figure 3
AMT-4			32.3212		3		379.738		Truesdale et al. 2000		Figure 3
AMT-4			31.0352		3		381.255		Truesdale et al. 2000		Figure 3
AMT-4			30.4726		3		356.816		Truesdale et al. 2000		Figure 3
AMT-4			29.3474		3		362.641		Truesdale et al. 2000		Figure 3
AMT-4			27.4987		3		329.642		Truesdale et al. 2000		Figure 3
AMT-4			26.2127		3		326.839		Truesdale et al. 2000		Figure 3
AMT-4			25.3286		3		293.782		Truesdale et al. 2000		Figure 3
AMT-4			24.6856		3		326.931		Truesdale et al. 2000		Figure 3
AMT-4			24.0426		3		272.266		Truesdale et al. 2000		Figure 3
AMT-4			23.5603		3		269.415		Truesdale et al. 2000		Figure 3
AMT-4			22.7566		3		295.375		Truesdale et al. 2000		Figure 3
AMT-4			19.7827		3		237.97		Truesdale et al. 2000		Figure 3
AMT-4			19.0593		3		246.651		Truesdale et al. 2000		Figure 3
AMT-4			18.3359		3		193.43		Truesdale et al. 2000		Figure 3
AMT-4			16.7284		3		229.515		Truesdale et al. 2000		Figure 3
AMT-4			16.005		3		110.075		Truesdale et al. 2000		Figure 3
AMT-4			13.0311		3		304.593		Truesdale et al. 2000		Figure 3
AMT-4			10.9414		3		238.498		Truesdale et al. 2000		Figure 3
AMT-4			10.4591		3		237.087		Truesdale et al. 2000		Figure 3
AMT-4			8.53009		3		189.697		Truesdale et al. 2000		Figure 3
AMT-4			7.32446		3		227.198		Truesdale et al. 2000		Figure 3
AMT-4			6.60108		3		231.56		Truesdale et al. 2000		Figure 3
AMT-4			5.47582		3		198.517		Truesdale et al. 2000		Figure 3
AMT-4			4.59169		3		237.438		Truesdale et al. 2000		Figure 3
AMT-4			3.86831		3		238.921		Truesdale et al. 2000		Figure 3
AMT-4			3.14493		3		226.008		Truesdale et al. 2000		Figure 3
AMT-4			2.28052		3		231.484		Truesdale et al. 2000		Figure 3
AMT-4			1.39677		3		256.529		Truesdale et al. 2000		Figure 3
AMT-4			0.885116		3		244.897		Truesdale et al. 2000		Figure 3
AMT-4			-1.11497		3		245.849		Truesdale et al. 2000		Figure 3
AMT-4			-3.39414		3		274.31		Truesdale et al. 2000		Figure 3
AMT-4			-5.20817		3		258.59		Truesdale et al. 2000		Figure 3
AMT-4			-7.44082		3		275.385		Truesdale et al. 2000		Figure 3
AMT-4			-9.67347		3		220.535		Truesdale et al. 2000		Figure 3
AMT-4			-11.0689		3		240.612		Truesdale et al. 2000		Figure 3
AMT-4			-12.1852		3		211.521		Truesdale et al. 2000		Figure 3
AMT-4			-12.8364		3		214.892		Truesdale et al. 2000		Figure 3
AMT-4			-13.7667		3		210.782		Truesdale et al. 2000		Figure 3
AMT-4			-15.3016		3		227.535		Truesdale et al. 2000		Figure 3
AMT-4			-17.2087		3		202.657		Truesdale et al. 2000		Figure 3
AMT-4			-18.7436		3		226.075		Truesdale et al. 2000		Figure 3
AMT-4			-19.1622		3		213.604		Truesdale et al. 2000		Figure 3
AMT-4			-21.767		3		222.09		Truesdale et al. 2000		Figure 3
AMT-4			-22.6508		3		222.143		Truesdale et al. 2000		Figure 3
AMT-4			-23.6276		3		253.025		Truesdale et al. 2000		Figure 3
AMT-4			-24.5578		3		238.918		Truesdale et al. 2000		Figure 3
AMT-4			-25.7207		3		261.481		Truesdale et al. 2000		Figure 3
AMT-4			-26.6044		3		239.873		Truesdale et al. 2000		Figure 3
AMT-4			-28.4185		3		273.305		Truesdale et al. 2000		Figure 3
AMT-4			-29.0231		3		252.514		Truesdale et al. 2000		Figure 3
AMT-4			-29.8604		3		287.553		Truesdale et al. 2000		Figure 3
AMT-4			-30.5581		3		263.436		Truesdale et al. 2000		Figure 3
AMT-4			-31.6744		3		300.158		Truesdale et al. 2000		Figure 3
AMT-4			-35.2094		3		317.03		Truesdale et al. 2000		Figure 3
AMT-4			-37.07		3		463.764		Truesdale et al. 2000		Figure 3
AMT-4			-38.1863		3		443.003		Truesdale et al. 2000		Figure 3
AMT-4			-39.6748		3		470.584		Truesdale et al. 2000		Figure 3
AMT-4			-40.3259		3		440.632		Truesdale et al. 2000		Figure 3
AMT-4			-41.3027		3		239.918		Truesdale et al. 2000		Figure 3
AMT-4			-42.0469		3		241.628		Truesdale et al. 2000		Figure 3
AMT-4			-43.0702		3		436.63		Truesdale et al. 2000		Figure 3
AMT-4			-44.6982		3		414.234		Truesdale et al. 2000		Figure 3
AMT-4			-45.7215		3		333.487		Truesdale et al. 2000		Figure 3
AMT-4			-46.5123		3		416.842		Truesdale et al. 2000		Figure 3
AMT-4			-47.21		3		413.551		Truesdale et al. 2000		Figure 3
AMT-4			-47.8611		3		471.905		Truesdale et al. 2000		Figure 3
AMT-4			-48.6054		3		471.95		Truesdale et al. 2000		Figure 3
AMT-4			-48.931		3		502.793		Truesdale et al. 2000		Figure 3
AMT-4			-49.4891		3		453.675		Truesdale et al. 2000		Figure 3
AMT-4			-50.2333		3		500.372		Truesdale et al. 2000		Figure 3
AMT-4			-51.3962		3		373.813		Truesdale et al. 2000		Figure 3
AMT-4			49.5584		3			428.387	Truesdale et al. 2000		Figure 3
AMT-4			49.0152		3			410.345	Truesdale et al. 2000		Figure 3
AMT-4			48.7734		3			421.433	Truesdale et al. 2000		Figure 3
AMT-4			48.3161		3			412.007	Truesdale et al. 2000		Figure 3
AMT-4			48.3042		3			426.372	Truesdale et al. 2000		Figure 3
AMT-4			47.9389		3			418.175	Truesdale et al. 2000		Figure 3
AMT-4			47.7477		3			424.336	Truesdale et al. 2000		Figure 3
AMT-4			47.7053		3			419.413	Truesdale et al. 2000		Figure 3
AMT-4			47.4177		3			429.682	Truesdale et al. 2000		Figure 3
AMT-4			47.2894		3			416.142	Truesdale et al. 2000		Figure 3
AMT-4			46.6762		3			426.42	Truesdale et al. 2000		Figure 3
AMT-4			45.5171		3			421.94	Truesdale et al. 2000		Figure 3
AMT-4			43.9745		3			431.014	Truesdale et al. 2000		Figure 3
AMT-4			42.8643		3			423.659	Truesdale et al. 2000		Figure 3
AMT-4			41.316		3			439.711	Truesdale et al. 2000		Figure 3
AMT-4			40.4507		3			417.574	Truesdale et al. 2000		Figure 3
AMT-4			38.6301		3			425.425	Truesdale et al. 2000		Figure 3
AMT-4			37.1458		3			420.544	Truesdale et al. 2000		Figure 3
AMT-4			35.2787		3			428.397	Truesdale et al. 2000		Figure 3
AMT-4			34.6774		3			424.31	Truesdale et al. 2000		Figure 3
AMT-4			33.2775		3			429.687	Truesdale et al. 2000		Figure 3
AMT-4			32.6325		3			422.319	Truesdale et al. 2000		Figure 3
AMT-4			31.9282		3			430.137	Truesdale et al. 2000		Figure 3
AMT-4			31.3307		3			421.536	Truesdale et al. 2000		Figure 3
AMT-4			30.6272		3			428.534	Truesdale et al. 2000		Figure 3
AMT-4			30.0287		3			421.164	Truesdale et al. 2000		Figure 3
AMT-4			28.3066		3			422.446	Truesdale et al. 2000		Figure 3
AMT-4			26.9549		3			425.769	Truesdale et al. 2000		Figure 3
AMT-4			26.0756		3			420.459	Truesdale et al. 2000		Figure 3
AMT-4			23.191		3			421.365	Truesdale et al. 2000		Figure 3
AMT-4			22.391		3			432.47	Truesdale et al. 2000		Figure 3
AMT-4			20.3115		3			416.114	Truesdale et al. 2000		Figure 3
AMT-4			19.5153		3			422.704	Truesdale et al. 2000		Figure 3
AMT-4			18.6753		3			426.012	Truesdale et al. 2000		Figure 3
AMT-4			17.9342		3			422.34	Truesdale et al. 2000		Figure 3
AMT-4			16.4416		3			427.309	Truesdale et al. 2000		Figure 3
AMT-4			15.7093		3			412.966	Truesdale et al. 2000		Figure 3
AMT-4			14.9528		3			427.764	Truesdale et al. 2000		Figure 3
AMT-4			14.0748		3			420.812	Truesdale et al. 2000		Figure 3
AMT-4			12.7149		3			433.986	Truesdale et al. 2000		Figure 3
AMT-4			11.7949		3			421.7	Truesdale et al. 2000		Figure 3
AMT-4			11.42		3			424.995	Truesdale et al. 2000		Figure 3
AMT-4			9.9921		3			408.21	Truesdale et al. 2000		Figure 3
AMT-4			9.24855		3			407.411	Truesdale et al. 2000		Figure 3
AMT-4			8.35143		3			423.443	Truesdale et al. 2000		Figure 3
AMT-4			6.03937		3			407.095	Truesdale et al. 2000		Figure 3
AMT-4			3.56588		3			417.017	Truesdale et al. 2000		Figure 3
AMT-4			2.82438		3			413.756	Truesdale et al. 2000		Figure 3
AMT-4			1.92761		3			429.378	Truesdale et al. 2000		Figure 3
AMT-4			-1.36844		3			421.677	Truesdale et al. 2000		Figure 3
AMT-4			-5.22917		3			421.79	Truesdale et al. 2000		Figure 3
AMT-4			-9.1754		3			412.877	Truesdale et al. 2000		Figure 3
AMT-4			-11.3394		3			442.08	Truesdale et al. 2000		Figure 3
AMT-4			-13.3176		3			415.872	Truesdale et al. 2000		Figure 3
AMT-4			-13.9729		3			420.816	Truesdale et al. 2000		Figure 3
AMT-4			-15.3184		3			416.752	Truesdale et al. 2000		Figure 3
AMT-4			-16.1136		3			422.111	Truesdale et al. 2000		Figure 3
AMT-4			-16.5268		3			415.556	Truesdale et al. 2000		Figure 3
AMT-4			-17.4184		3			425.022	Truesdale et al. 2000		Figure 3
AMT-4			-18.2957		3			417.25	Truesdale et al. 2000		Figure 3
AMT-4			-20.4792		3			414.031	Truesdale et al. 2000		Figure 3
AMT-4			-24.897		3			412.929	Truesdale et al. 2000		Figure 3
AMT-4			-25.7473		3			428.55	Truesdale et al. 2000		Figure 3
AMT-4			-28.846		3			407.3	Truesdale et al. 2000		Figure 3
AMT-4			-34.0184		3			418.533	Truesdale et al. 2000		Figure 3
AMT-4			-35.3215		3			419.392	Truesdale et al. 2000		Figure 3
AMT-4			-35.5021		3			412.831	Truesdale et al. 2000		Figure 3
AMT-4			-37.2874		3			434.225	Truesdale et al. 2000		Figure 3
AMT-4			-38.2851		3			459.29	Truesdale et al. 2000		Figure 3
AMT-4			-39.2007		3			441.669	Truesdale et al. 2000		Figure 3
AMT-4			-39.9959		3			447.027	Truesdale et al. 2000		Figure 3
AMT-4			-42.4461		3			429.041	Truesdale et al. 2000		Figure 3
AMT-4			-43.2892		3			436.043	Truesdale et al. 2000		Figure 3
AMT-4			-44.5844		3			427.463	Truesdale et al. 2000		Figure 3
AMT-4			-45.6077		3			427.493	Truesdale et al. 2000		Figure 3
AMT-4			-46.0305		3			432.43	Truesdale et al. 2000		Figure 3
AMT-4			-46.6748		3			424.241	Truesdale et al. 2000		Figure 3
AMT-4			-47.6205		3			442.737	Truesdale et al. 2000		Figure 3
AMT-4			-48.6336		3			430.455	Truesdale et al. 2000		Figure 3
AMT-4			-49.1972		3			437.038	Truesdale et al. 2000		Figure 3
AMT-4			-49.3761		3			428.424	Truesdale et al. 2000		Figure 3
AMT-4			-49.8536		3			443.213	Truesdale et al. 2000		Figure 3
AMT-4			-50.4945		3			430.92	Truesdale et al. 2000		Figure 3
AMT-4			-51.1474		3			432.991	Truesdale et al. 2000		Figure 3
AMT-4			-51.7939		3			427.264	Truesdale et al. 2000		Figure 3
Baltic	Kattegat3	Baltic_Kattegat3_1	56.1317	11.16	1	138	51	189	Truesdale, V. W., Nausch, G. & Baker, A. The distribution of iodine in the Baltic Sea during summer. Mar. Chem. 74, 87-98 (2001).	Chance 2014	Table 2, page 94
Baltic	360	Baltic_360_1	54.5983	10.4517	1	121	51	172	Truesdale, V. W., Nausch, G. & Baker, A. The distribution of iodine in the Baltic Sea during summer. Mar. Chem. 74, 87-98 (2001).	Chance 2014	Table 2, page 94
Baltic	113	Baltic_113_1	54.925	13.5017	1	58	51	109	Truesdale, V. W., Nausch, G. & Baker, A. The distribution of iodine in the Baltic Sea during summer. Mar. Chem. 74, 87-98 (2001).	Chance 2014	Table 2, page 94
Baltic	271	Baltic_271_1	57.32	20.0517	1	54	51	105	Truesdale, V. W., Nausch, G. & Baker, A. The distribution of iodine in the Baltic Sea during summer. Mar. Chem. 74, 87-98 (2001).	Chance 2014	Table 2, page 94
Baltic	Kattegat2	Baltic_Kattegat2_3	57.6717	11.3983	3	179	51	230	Truesdale, V. W., Nausch, G. & Baker, A. The distribution of iodine in the Baltic Sea during summer. Mar. Chem. 74, 87-98 (2001).	Chance 2014	Table 2, page 94
Baltic	213	Baltic_213_3	55.2483	15.985	3	59	51	110	Truesdale, V. W., Nausch, G. & Baker, A. The distribution of iodine in the Baltic Sea during summer. Mar. Chem. 74, 87-98 (2001).	Chance 2014	Table 2, page 94
Baltic	Kattegat1	Baltic_Kattegat1_4	58.0767	10.9767	4	313	51	364	Truesdale, V. W., Nausch, G. & Baker, A. The distribution of iodine in the Baltic Sea during summer. Mar. Chem. 74, 87-98 (2001).	Chance 2014	Table 2, page 94
Baltic	360	Baltic_360_10	54.5983	10.4517	10			204	Truesdale et al., 2001	Chance 2014	Table 2
Baltic	360	Baltic_360_16	54.5983	10.4517	16			244	Truesdale et al., 2001	Chance 2014	Table 2
Baltic	Kattegat3	Baltic_Kattegat3_25	56.1317	11.16	25			349	Truesdale et al., 2001	Chance 2014	Table 2
Baltic	Kattegat2	Baltic_Kattegat2_30	57.6717	11.3983	30			369	Truesdale et al., 2001	Chance 2014	Table 2
Baltic	113	Baltic_113_30	54.925	13.5017	30			128	Truesdale et al., 2001	Chance 2014	Table 2
Baltic	Kattegat3	Baltic_Kattegat3_36	56.1317	11.16	36			349	Truesdale et al., 2001	Chance 2014	Table 2
Baltic	113	Baltic_113_44	54.925	13.5017	44			239	Truesdale et al., 2001	Chance 2014	Table 2
Baltic	213	Baltic_213_50	55.2483	15.985	50			137	Truesdale et al., 2001	Chance 2014	Table 2
Baltic	213	Baltic_213_60	55.2483	15.985	60			289	Truesdale et al., 2001	Chance 2014	Table 2
Baltic	271	Baltic_271_60	57.32	20.0517	60			143	Truesdale et al., 2001	Chance 2014	Table 2
Baltic	Kattegat1	Baltic_Kattegat1_70	58.0767	10.9767	70			423	Truesdale et al., 2001	Chance 2014	Table 2
Baltic	271	Baltic_271_80	57.32	20.0517	80			163	Truesdale et al., 2001	Chance 2014	Table 2
Baltic	213	Baltic_213_85	55.2483	15.985	85			267	Truesdale et al., 2001	Chance 2014	Table 2
Baltic	Kattegat2	Baltic_Kattegat2_90	57.6717	11.3983	90			436	Truesdale et al., 2001	Chance 2014	Table 2
Baltic	Kattegat1	Baltic_Kattegat1_135	58.0767	10.9767	135			424	Truesdale et al., 2001	Chance 2014	Table 2
Baltic	271	Baltic_271_225	57.32	20.0517	225			234	Truesdale et al., 2001	Chance 2014	Table 2
ANTMESO	av		-62.6596	-60.3735	6.5	7	397	404	Truesdale, V. W., Kennedy, H., AgustÃ­, S. & Waite, T. J. On the relative constancy of iodate and total-iodine concentrations accompanying phytoplankton blooms initiated in mesocosm experiments in Antarctica. Limnol. Oceanogr. 48, 1569-1574 (2003).	Chance 2014	Figure 2
ICELAND	SW	ICELAND_SW_2	64.3333	-27.9833	2	30	405	420	Waite et al., 2006	Chance 2014	Figure 5
ICELAND	SW	ICELAND_SW_2	64.3333	-27.9833	2	30	435	460	Waite et al., 2006	Chance 2014	Figure 5
ICELAND	SW	ICELAND_SW_2	64.3333	-27.9833	2	30	410	440	Waite et al., 2006	Chance 2014	Figure 5
ICELAND	NE	ICELAND_NE_2	68	-12.6667	2	42	410	420	Waite et al., 2006	Chance 2014	Figure 6
ICELAND	NE	ICELAND_NE_2	68	-12.6667	2	25	425	450	Waite et al., 2006	Chance 2014	Figure 6
ICELAND	NE	ICELAND_NE_2	68	-12.6667	2	50	410	460	Waite et al., 2006	Chance 2014	Figure 6
ICELAND	NW	ICELAND_NW_2	66.5	-27.6167	2	35	380	395	Waite et al., 2006	Chance 2014	Figure 7
ICELAND	TS	ICELAND_TS_2	62.97	-21.79	2	23	440	462	Waite et al., 2006	Chance 2014	Table 2
ICELAND	TS	ICELAND_TS_2	62.97	-21.79	2	62	396	462	Waite et al., 2006	Chance 2014	Table 2
ICELAND	TS	ICELAND_TS_2	62.97	-21.79	2	26	406	417	Waite et al., 2006	Chance 2014	Table 2
ICELAND	TN	ICELAND_TN_2	66.54	-18.67	2	29	420	450	Waite et al., 2006	Chance 2014	Table 2
ICELAND	TN	ICELAND_TN_2	66.54	-18.67	2	50	394	444	Waite et al., 2006	Chance 2014	Table 2
ICELAND	TN	ICELAND_TN_2	66.54	-18.67	2	24	407	417	Waite et al., 2006	Chance 2014	Table 2
ICELAND	SW		64.3333	-27.9833	0	27	408	424	Waite et al. 2006		Figure 5
ICELAND	SW		64.3333	-27.9833	5	20	406	424	Waite et al. 2006		Figure 5
ICELAND	SW		64.3333	-27.9833	20	24	406	423	Waite et al. 2006		Figure 5
ICELAND	SW		64.3333	-27.9833	50	29	411	426	Waite et al. 2006		Figure 5
ICELAND	SW		64.3333	-27.9833	100	29	407	418	Waite et al. 2006		Figure 5
ICELAND	SW		64.3333	-27.9833	150	34	409	420	Waite et al. 2006		Figure 5
ICELAND	SW		64.3333	-27.9833	200	17	423	423	Waite et al. 2006		Figure 5
ICELAND	SW		64.3333	-27.9833	400	12	425	423	Waite et al. 2006		Figure 5
ICELAND	SW		64.3333	-27.9833	600	9	430	421	Waite et al. 2006		Figure 5
ICELAND	SW		64.3333	-27.9833	1000	5	430	421	Waite et al. 2006		Figure 5
ICELAND	SW		64.3333	-27.9833	0	28	440	466	Waite et al. 2006		Figure 5
ICELAND	SW		64.3333	-27.9833	5	28	440	465	Waite et al. 2006		Figure 5
ICELAND	SW		64.3333	-27.9833	15	30	440	465	Waite et al. 2006		Figure 5
ICELAND	SW		64.3333	-27.9833	50	31	439	466	Waite et al. 2006		Figure 5
ICELAND	SW		64.3333	-27.9833	100	18	441	460	Waite et al. 2006		Figure 5
ICELAND	SW		64.3333	-27.9833	150	20	441	461	Waite et al. 2006		Figure 5
ICELAND	SW		64.3333	-27.9833	200	31	433	464	Waite et al. 2006		Figure 5
ICELAND	SW		64.3333	-27.9833	400	31	432	462	Waite et al. 2006		Figure 5
ICELAND	SW		64.3333	-27.9833	600	12	450	460	Waite et al. 2006		Figure 5
ICELAND	SW		64.3333	-27.9833	800	17	451	466	Waite et al. 2006		Figure 5
ICELAND	SW		64.3333	-27.9833	1000	21	447	466	Waite et al. 2006		Figure 5
ICELAND	SW		64.3333	-27.9833	0	30	416	440	Waite et al. 2006		Figure 5
ICELAND	SW		64.3333	-27.9833	5	28	417	444	Waite et al. 2006		Figure 5
ICELAND	SW		64.3333	-27.9833	25	28	410	444	Waite et al. 2006		Figure 5
ICELAND	SW		64.3333	-27.9833	50	20	433	457	Waite et al. 2006		Figure 5
ICELAND	SW		64.3333	-27.9833	10	20	440	464	Waite et al. 2006		Figure 5
ICELAND	SW		64.3333	-27.9833	150	13	438	452	Waite et al. 2006		Figure 5
ICELAND	SW		64.3333	-27.9833	200	13	441	457	Waite et al. 2006		Figure 5
ICELAND	SW		64.3333	-27.9833	400	9	444	456	Waite et al. 2006		Figure 5
ICELAND	SW		64.3333	-27.9833	60	7	437	444	Waite et al. 2006		Figure 5
ICELAND	SW		64.3333	-27.9833	800	4	452	460	Waite et al. 2006		Figure 5
ICELAND	SW		64.3333	-27.9833	1000	3	460	464	Waite et al. 2006		Figure 5
ICELAND	NE		68	-12.6667	5	46	393	415	Waite et al. 2006		Figure 6
ICELAND	NE		68	-12.6667	15		398		Waite et al. 2006		Figure 6
ICELAND	NE		68	-12.6667	25	40	398	409	Waite et al. 2006		Figure 6
ICELAND	NE		68	-12.6667	50			415	Waite et al. 2006		Figure 6
ICELAND	NE		68	-12.6667	60	36	405		Waite et al. 2006		Figure 6
ICELAND	NE		68	-12.6667	80			416	Waite et al. 2006		Figure 6
ICELAND	NE		68	-12.6667	100	14	418	421	Waite et al. 2006		Figure 6
ICELAND	NE		68	-12.6667	150	7		420	Waite et al. 2006		Figure 6
ICELAND	NE		68	-12.6667	200	7		421	Waite et al. 2006		Figure 6
ICELAND	NE		68	-12.6667	300	9	418	414	Waite et al. 2006		Figure 6
ICELAND	NE		68	-12.6667	400	18	431	415	Waite et al. 2006		Figure 6
ICELAND	NE		68	-12.6667	600	6	427	421	Waite et al. 2006		Figure 6
ICELAND	NE		68	-12.6667	800	9	431	420	Waite et al. 2006		Figure 6
ICELAND	NE		68	-12.6667	1000	2	434	421	Waite et al. 2006		Figure 6
ICELAND	NE		68	-12.6667	1200	4	438	427	Waite et al. 2006		Figure 6
ICELAND	NE		68	-12.6667	1400	7	431	424	Waite et al. 2006		Figure 6
ICELAND	NE		68	-12.6667	1600	0	343	429	Waite et al. 2006		Figure 6
ICELAND	NE		68	-12.6667	1800	6	436	423	Waite et al. 2006		Figure 6
ICELAND	NE		68	-12.6667	0	26	425	447	Waite et al. 2006		Figure 6
ICELAND	NE		68	-12.6667	25	31	424	454	Waite et al. 2006		Figure 6
ICELAND	NE		68	-12.6667	50	36	422	454	Waite et al. 2006		Figure 6
ICELAND	NE		68	-12.6667	65	36			Waite et al. 2006		Figure 6
ICELAND	NE		68	-12.6667	100	25	426	450	Waite et al. 2006		Figure 6
ICELAND	NE		68	-12.6667	150	30	425	454	Waite et al. 2006		Figure 6
ICELAND	NE		68	-12.6667	200	25	438	464	Waite et al. 2006		Figure 6
ICELAND	NE		68	-12.6667	400	23	438	460	Waite et al. 2006		Figure 6
ICELAND	NE		68	-12.6667	600	21	442	463	Waite et al. 2006		Figure 6
ICELAND	NE		68	-12.6667	800	13	448	460	Waite et al. 2006		Figure 6
ICELAND	NE		68	-12.6667	1000	13	451	460	Waite et al. 2006		Figure 6
ICELAND	NE		68	-12.6667	1200	11	452	462	Waite et al. 2006		Figure 6
ICELAND	NE		68	-12.6667	1400	11	450	456	Waite et al. 2006		Figure 6
ICELAND	NE		68	-12.6667	1600	18	457	468	Waite et al. 2006		Figure 6
ICELAND	NE		68	-12.6667	1800	5	454	458	Waite et al. 2006		Figure 6
ICELAND	NE		68	-12.6667	0	52	415	467	Waite et al. 2006		Figure 6
ICELAND	NE		68	-12.6667	5	22	436	457	Waite et al. 2006		Figure 6
ICELAND	NE		68	-12.6667	25	8	458	461	Waite et al. 2006		Figure 6
ICELAND	NE		68	-12.6667	50			468	Waite et al. 2006		Figure 6
ICELAND	NE		68	-12.6667	100	44	411	452	Waite et al. 2006		Figure 6
ICELAND	NE		68	-12.6667	150	17	433	455	Waite et al. 2006		Figure 6
ICELAND	NE		68	-12.6667	200	9	456	462	Waite et al. 2006		Figure 6
ICELAND	NE		68	-12.6667	300	9	452	460	Waite et al. 2006		Figure 6
ICELAND	NE		68	-12.6667	400	30	430	457	Waite et al. 2006		Figure 6
ICELAND	NE		68	-12.6667	600	17	441	455	Waite et al. 2006		Figure 6
ICELAND	NE		68	-12.6667	800	9	457	458	Waite et al. 2006		Figure 6
ICELAND	NE		68	-12.6667	1000	12	457	463	Waite et al. 2006		Figure 6
ICELAND	NE		68	-12.6667	1200	34	425	454	Waite et al. 2006		Figure 6
ICELAND	NE		68	-12.6667	1400	14	447	458	Waite et al. 2006		Figure 6
ICELAND	NE		68	-12.6667	1600	13	458	463	Waite et al. 2006		Figure 6
ICELAND	NE		68	-12.6667	1800	11	460	464	Waite et al. 2006		Figure 6
ICELAND	NW		66.5	-27.6167	0	32	377	392	Waite et al. 2006		Figure 7
ICELAND	NW		66.5	-27.6167	10	25	383	397	Waite et al. 2006		Figure 7
ICELAND	NW		66.5	-27.6167	20	34	387	396	Waite et al. 2006		Figure 7
ICELAND	NW		66.5	-27.6167	30	29	390	396	Waite et al. 2006		Figure 7
ICELAND	NW		66.5	-27.6167	50	31	395	405	Waite et al. 2006		Figure 7
ICELAND	NW		66.5	-27.6167	75	40	396	410	Waite et al. 2006		Figure 7
ICELAND	NW		66.5	-27.6167	100	26	400	405	Waite et al. 2006		Figure 7
ICELAND	NW		66.5	-27.6167	150	21	402	408	Waite et al. 2006		Figure 7
ICELAND	NW		66.5	-27.6167	200	17	409	408	Waite et al. 2006		Figure 7
ICELAND	NW		66.5	-27.6167	300	8	415	421	Waite et al. 2006		Figure 7
ICELAND	NW		66.5	-27.6167	360	35	421	416	Waite et al. 2006		Figure 7
ICELAND	SW		64.3333	-27.9833	0				Waite et al. 2006		Figure 4
ICELAND	SW		64.3333	-27.9833	15				Waite et al. 2006		Figure 4
ICELAND	SW		64.3333	-27.9833	25				Waite et al. 2006		Figure 4
ICELAND	SW		64.3333	-27.9833	50				Waite et al. 2006		Figure 4
ICELAND	SW		64.3333	-27.9833	100				Waite et al. 2006		Figure 4
ICELAND	SW		64.3333	-27.9833	150				Waite et al. 2006		Figure 4
ICELAND	SW		64.3333	-27.9833	200				Waite et al. 2006		Figure 4
ICELAND	SW		64.3333	-27.9833	300				Waite et al. 2006		Figure 4
ICELAND	SW		64.3333	-27.9833	400				Waite et al. 2006		Figure 4
ICELAND	SW		64.3333	-27.9833	600				Waite et al. 2006		Figure 4
ICELAND	SW		64.3333	-27.9833	800				Waite et al. 2006		Figure 4
ICELAND	SW		64.3333	-27.9833	1000				Waite et al. 2006		Figure 4
ICELAND	SW		64.3333	-27.9833	0				Waite et al. 2006		Figure 4
ICELAND	SW		64.3333	-27.9833	15				Waite et al. 2006		Figure 4
ICELAND	SW		64.3333	-27.9833	25				Waite et al. 2006		Figure 4
ICELAND	SW		64.3333	-27.9833	50				Waite et al. 2006		Figure 4
ICELAND	SW		64.3333	-27.9833	100				Waite et al. 2006		Figure 4
ICELAND	SW		64.3333	-27.9833	150				Waite et al. 2006		Figure 4
ICELAND	SW		64.3333	-27.9833	200				Waite et al. 2006		Figure 4
ICELAND	SW		64.3333	-27.9833	400				Waite et al. 2006		Figure 4
ICELAND	SW		64.3333	-27.9833	600				Waite et al. 2006		Figure 4
ICELAND	SW		64.3333	-27.9833	1000				Waite et al. 2006		Figure 4
ICELAND	SW		64.3333	-27.9833	0				Waite et al. 2006		Figure 4
ICELAND	SW		64.3333	-27.9833	5				Waite et al. 2006		Figure 4
ICELAND	SW		64.3333	-27.9833	15				Waite et al. 2006		Figure 4
ICELAND	SW		64.3333	-27.9833	50				Waite et al. 2006		Figure 4
ICELAND	SW		64.3333	-27.9833	100				Waite et al. 2006		Figure 4
ICELAND	SW		64.3333	-27.9833	150				Waite et al. 2006		Figure 4
ICELAND	SW		64.3333	-27.9833	200				Waite et al. 2006		Figure 4
ICELAND	SW		64.3333	-27.9833	400				Waite et al. 2006		Figure 4
ICELAND	SW		64.3333	-27.9833	600				Waite et al. 2006		Figure 4
ICELAND	SW		64.3333	-27.9833	800				Waite et al. 2006		Figure 4
ICELAND	SW		64.3333	-27.9833	1000				Waite et al. 2006		Figure 4
ICELAND	NE		68	-12.6667	0				Waite et al. 2006		Figure 4
ICELAND	NE		68	-12.6667	15				Waite et al. 2006		Figure 4
ICELAND	NE		68	-12.6667	25				Waite et al. 2006		Figure 4
ICELAND	NE		68	-12.6667	60				Waite et al. 2006		Figure 4
ICELAND	NE		68	-12.6667	100				Waite et al. 2006		Figure 4
ICELAND	NE		68	-12.6667	150				Waite et al. 2006		Figure 4
ICELAND	NE		68	-12.6667	300				Waite et al. 2006		Figure 4
ICELAND	NE		68	-12.6667	400				Waite et al. 2006		Figure 4
ICELAND	NE		68	-12.6667	600				Waite et al. 2006		Figure 4
ICELAND	NE		68	-12.6667	800				Waite et al. 2006		Figure 4
ICELAND	NE		68	-12.6667	1000				Waite et al. 2006		Figure 4
ICELAND	NE		68	-12.6667	1200				Waite et al. 2006		Figure 4
ICELAND	NE		68	-12.6667	1400				Waite et al. 2006		Figure 4
ICELAND	NE		68	-12.6667	1600				Waite et al. 2006		Figure 4
ICELAND	NE		68	-12.6667	1800				Waite et al. 2006		Figure 4
ICELAND	NE		68	-12.6667	0				Waite et al. 2006		Figure 4
ICELAND	NE		68	-12.6667	25				Waite et al. 2006		Figure 4
ICELAND	NE		68	-12.6667	30				Waite et al. 2006		Figure 4
ICELAND	NE		68	-12.6667	100				Waite et al. 2006		Figure 4
ICELAND	NE		68	-12.6667	150				Waite et al. 2006		Figure 4
ICELAND	NE		68	-12.6667	200				Waite et al. 2006		Figure 4
ICELAND	NE		68	-12.6667	300				Waite et al. 2006		Figure 4
ICELAND	NE		68	-12.6667	400				Waite et al. 2006		Figure 4
ICELAND	NE		68	-12.6667	600				Waite et al. 2006		Figure 4
ICELAND	NE		68	-12.6667	800				Waite et al. 2006		Figure 4
ICELAND	NE		68	-12.6667	1000				Waite et al. 2006		Figure 4
ICELAND	NE		68	-12.6667	1200				Waite et al. 2006		Figure 4
ICELAND	NE		68	-12.6667	1400				Waite et al. 2006		Figure 4
ICELAND	NE		68	-12.6667	1600				Waite et al. 2006		Figure 4
ICELAND	NE		68	-12.6667	0				Waite et al. 2006		Figure 4
ICELAND	NE		68	-12.6667	25				Waite et al. 2006		Figure 4
ICELAND	NE		68	-12.6667	50				Waite et al. 2006		Figure 4
ICELAND	NE		68	-12.6667	100				Waite et al. 2006		Figure 4
ICELAND	NE		68	-12.6667	150				Waite et al. 2006		Figure 4
ICELAND	NE		68	-12.6667	200				Waite et al. 2006		Figure 4
ICELAND	NE		68	-12.6667	400				Waite et al. 2006		Figure 4
ICELAND	NE		68	-12.6667	600				Waite et al. 2006		Figure 4
ICELAND	NE		68	-12.6667	800				Waite et al. 2006		Figure 4
ICELAND	NE		68	-12.6667	1000				Waite et al. 2006		Figure 4
ICELAND	NE		68	-12.6667	1200				Waite et al. 2006		Figure 4
ICELAND	NE		68	-12.6667	1400				Waite et al. 2006		Figure 4
ICELAND	NE		68	-12.6667	1600				Waite et al. 2006		Figure 4
ICELAND	NE		68	-12.6667	1800				Waite et al. 2006		Figure 4
AII-79	2033	AII-79_2033_0	13.3667	-64.7167	0	98	325	423	Wong, G. T. F. & Brewer, P. G. The marine chemistry of iodine in anoxic basins. Geochim. Cosmochim. Acta 41, 151-159 (1977).	Chance 2014	Appendix table 1
AII-79	2038	AII-79_2038_0	10.5167	-64.75	0	86	340	426	Wong, G. T. F. & Brewer, P. G. The marine chemistry of iodine in anoxic basins. Geochim. Cosmochim. Acta 41, 151-159 (1977).	Chance 2014	Appendix table 4
CHAIN-120	1355	CHAIN-120_1355_10	42.8333	33	10	47	88	135	Wong, G. T. F. & Brewer, P. G. The marine chemistry of iodine in anoxic basins. Geochim. Cosmochim. Acta 41, 151-159 (1977).	Chance 2014	Appendix table 4
AII-79	2037	AII-79_2037_18	10.6167	-65.4333	18	0	369	369	Wong&Brewer, 1977	Chance 2014	Appendix table 2
AII-79	2033	AII-79_2033_25	13.3667	-64.7167	25	124	318	442	Wong&Brewer, 1977	Chance 2014	Appendix table 1
AII-79	2037	AII-79_2037_35	10.6167	-65.4333	35	0	389	389	Wong&Brewer, 1977	Chance 2014	Appendix table 2
AII-79	2038	AII-79_2038_49	10.5167	-64.75	49	51	395	446	Wong&Brewer, 1977	Chance 2014	Appendix table 4
AII-79	2033	AII-79_2033_51	13.3667	-64.7167	51	0	370	370	Wong&Brewer, 1977	Chance 2014	Appendix table 1
AII-79	2037	AII-79_2037_52	10.6167	-65.4333	52	0	407	407	Wong&Brewer, 1977	Chance 2014	Appendix table 4
AII-79	2038	AII-79_2038_54	10.5167	-64.75	54	45	400	445	Wong&Brewer, 1977	Chance 2014	Appendix table 4
AII-79	2038	AII-79_2038_69	10.5167	-64.75	69	42	411	453	Wong&Brewer, 1977	Chance 2014	Appendix table 4
AII-79	2037	AII-79_2037_70	10.6167	-65.4333	70	0	394	394	Wong&Brewer, 1977	Chance 2014	Appendix table 2
CHAIN-120	1355	CHAIN-120_1355_75	42.8333	33	75	11	135	146	Wong&Brewer, 1977	Chance 2014	Appendix table 4
AII-79	2033	AII-79_2033_76	13.3667	-64.7167	76	116	342	458	Wong&Brewer, 1977	Chance 2014	Appendix table 1
AII-79	2038	AII-79_2038_83	10.5167	-64.75	83	0	401	401	Wong&Brewer, 1977	Chance 2014	Appendix table 4
AII-79	2037	AII-79_2037_88	10.6167	-65.4333	88	0	448	448	Wong&Brewer, 1977	Chance 2014	Appendix table 2
CHAIN-120	1355	CHAIN-120_1355_98	42.8333	33	98	15	146	161	Wong&Brewer, 1977	Chance 2014	Appendix table 4
AII-79	2038	AII-79_2038_98	10.5167	-64.75	98	56	412	468	Wong&Brewer, 1977	Chance 2014	Appendix table 4
AII-79	2033	AII-79_2033_100	13.3667	-64.7167	100	377	438	815	Wong&Brewer, 1977	Chance 2014	Appendix table 1
CHAIN-120	1355	CHAIN-120_1355_102	42.8333	33	102	60	139	199	Wong&Brewer, 1977	Chance 2014	Appendix table 4
AII-79	2037	AII-79_2037_104	10.6167	-65.4333	104	0	450	450	Wong&Brewer, 1977	Chance 2014	Appendix table 2
CHAIN-120	1355	CHAIN-120_1355_108	42.8333	33	108	88	53	141	Wong&Brewer, 1977	Chance 2014	Appendix table 4
CHAIN-120	1355	CHAIN-120_1355_120	42.8333	33	120	150	81	231	Wong&Brewer, 1977	Chance 2014	Appendix table 4
AII-79	2037	AII-79_2037_122	10.6167	-65.4333	122	0	460	460	Wong&Brewer, 1977	Chance 2014	Appendix table 2
CHAIN-120	1355	CHAIN-120_1355_123	42.8333	33	123	200	104	304	Wong&Brewer, 1977	Chance 2014	Appendix table 4
AII-79	2038	AII-79_2038_123	10.5167	-64.75	123	33	410	443	Wong&Brewer, 1977	Chance 2014	Appendix table 4
AII-79	2038	AII-79_2038_123	10.5167	-64.75	123	24	404	428	Wong&Brewer, 1977	Chance 2014	Appendix table 4
AII-79	2038	AII-79_2038_133	10.5167	-64.75	133	27	414	441	Wong&Brewer, 1977	Chance 2014	Appendix table 4
CHAIN-120	1355	CHAIN-120_1355_144	42.8333	33	144	232	55	287	Wong&Brewer, 1977	Chance 2014	Appendix table 4
AII-79	2033	AII-79_2033_148	13.3667	-64.7167	148	151	469	620	Wong&Brewer, 1977	Chance 2014	Appendix table 1
AII-79	2038	AII-79_2038_157	10.5167	-64.75	157	19	431	450	Wong&Brewer, 1977	Chance 2014	Appendix table 3
AII-79	2038	AII-79_2038_157	10.5167	-64.75	157	208	415	623	Wong&Brewer, 1977	Chance 2014	Appendix table 3
AII-79	2037	AII-79_2037_158	10.6167	-65.4333	158	0	463	463	Wong&Brewer, 1977	Chance 2014	Appendix table 2
AII-79	2037	AII-79_2037_162	10.6167	-65.4333	162	0	462	462	Wong&Brewer, 1977	Chance 2014	Appendix table 2
AII-79	2038	AII-79_2038_176	10.5167	-64.75	176	69	420	489	Wong&Brewer, 1977	Chance 2014	Appendix table 3
AII-79	2037	AII-79_2037_182	10.6167	-65.4333	182	0	469	469	Wong&Brewer, 1977	Chance 2014	Appendix table 2
AII-79	2033	AII-79_2033_196	13.3667	-64.7167	196	7	460	467	Wong&Brewer, 1977	Chance 2014	Appendix table 1
AII-79	2038	AII-79_2038_196	10.5167	-64.75	196	271	270	541	Wong&Brewer, 1977	Chance 2014	Appendix table 3
AII-79	2037	AII-79_2037_205	10.6167	-65.4333	205				Wong&Brewer, 1977	Chance 2014	Appendix table 2
AII-79	2038	AII-79_2038_206	10.5167	-64.75	206	209	255	464	Wong&Brewer, 1977	Chance 2014	Appendix table 3
AII-79	2038	AII-79_2038_206	10.5167	-64.75	206	297	228	525	Wong&Brewer, 1977	Chance 2014	Appendix table 3
CHAIN-120	1355	CHAIN-120_1355_209	42.8333	33	209	216	0	216	Wong&Brewer, 1977	Chance 2014	Appendix table 4
AII-79	2038	AII-79_2038_221	10.5167	-64.75	221	357	213	570	Wong&Brewer, 1977	Chance 2014	Appendix table 3
AII-79	2037	AII-79_2037_224	10.6167	-65.4333	224	0	230	230	Wong&Brewer, 1977	Chance 2014	Appendix table 4
AII-79	2037	AII-79_2037_231	10.6167	-65.4333	231	0	182	182	Wong&Brewer, 1977	Chance 2014	Appendix table 2
AII-79	2037	AII-79_2037_238	10.6167	-65.4333	238	0	186	186	Wong&Brewer, 1977	Chance 2014	Appendix table 2
AII-79	2037	AII-79_2037_245	10.6167	-65.4333	245	0	171	171	Wong&Brewer, 1977	Chance 2014	Appendix table 2
AII-79	2033	AII-79_2033_246	13.3667	-64.7167	246	0	469	469	Wong&Brewer, 1977	Chance 2014	Appendix table 1
AII-79	2038	AII-79_2038_246	10.5167	-64.75	246	380	54	434	Wong&Brewer, 1977	Chance 2014	Appendix table 3
AII-79	2037	AII-79_2037_253	10.6167	-65.4333	253	0	276	276	Wong&Brewer, 1977	Chance 2014	Appendix table 2
AII-79	2037	AII-79_2037_260	10.6167	-65.4333	260	0	223	223	Wong&Brewer, 1977	Chance 2014	Appendix table 2
AII-79	2038	AII-79_2038_270	10.5167	-64.75	270	0	0	0	Wong&Brewer, 1977	Chance 2014	Appendix table 3
AII-79	2037	AII-79_2037_281	10.6167	-65.4333	281	0	102	102	Wong&Brewer, 1977	Chance 2014	Appendix table 2
CHAIN-120	1355	CHAIN-120_1355_286	42.8333	33	286	267	0	267	Wong&Brewer, 1977	Chance 2014	Appendix table 4
AII-79	2038	AII-79_2038_295	10.5167	-64.75	295	413	0	413	Wong&Brewer, 1977	Chance 2014	Appendix table 3
AII-79	2033	AII-79_2033_296	13.3667	-64.7167	296	4	464	468	Wong&Brewer, 1977	Chance 2014	Appendix table 1
AII-79	2037	AII-79_2037_304	10.6167	-65.4333	304	0	0	0	Wong&Brewer, 1977	Chance 2014	Appendix table 2
CHAIN-120	1355	CHAIN-120_1355_328	42.8333	33	328	276	0	276	Wong&Brewer, 1977	Chance 2014	Appendix table 4
AII-79	2038	AII-79_2038_345	10.5167	-64.75	345	509	0	509	Wong&Brewer, 1977	Chance 2014	Appendix table 3
AII-79	2037	AII-79_2037_352	10.6167	-65.4333	352	0	0	0	Wong&Brewer, 1977	Chance 2014	Appendix table 2
CHAIN-120	1355	CHAIN-120_1355_388	42.8333	33	388	287	0	287	Wong&Brewer, 1977	Chance 2014	Appendix table 4
AII-79	2037	AII-79_2037_392	10.6167	-65.4333	392	0	0	0	Wong&Brewer, 1977	Chance 2014	Appendix table 2
AII-79	2033	AII-79_2033_394	13.3667	-64.7167	394	7	446	453	Wong&Brewer, 1977	Chance 2014	Appendix table 1
AII-79	2038	AII-79_2038_442	10.5167	-64.75	442	321	0	321	Wong&Brewer, 1977	Chance 2014	Appendix table 3
CHAIN-120	1355	CHAIN-120_1355_490	42.8333	33	490	300	0	300	Wong&Brewer, 1977	Chance 2014	Appendix table 4
AII-79	2038	AII-79_2038_491	10.5167	-64.75	491	416	0	416	Wong&Brewer, 1977	Chance 2014	Appendix table 3
AII-79	2033	AII-79_2033_492	13.3667	-64.7167	492	0	497	497	Wong&Brewer, 1977	Chance 2014	Appendix table 1
AII-79	2038	AII-79_2038_541	10.5167	-64.75	541	478	0	487	Wong&Brewer, 1977	Chance 2014	Appendix table 3
AII-79	2038	AII-79_2038_587	10.5167	-64.75	587	437	0	437	Wong&Brewer, 1977	Chance 2014	Appendix table 3
AII-79	2033	AII-79_2033_589	13.3667	-64.7167	589	0	492	492	Wong&Brewer, 1977	Chance 2014	Appendix table 1
AII-79	2038	AII-79_2038_600	10.5167	-64.75	600	463	0	463	Wong&Brewer, 1977	Chance 2014	Appendix table 3
AII-79	2033	AII-79_2033_688	13.3667	-64.7167	688	3	498	501	Wong&Brewer, 1977	Chance 2014	Appendix table 1
AII-79	2038	AII-79_2038_688	10.5167	-64.75	688	465	0	465	Wong&Brewer, 1977	Chance 2014	Appendix table 3
CHAIN-120	1355	CHAIN-120_1355_735	42.8333	33	735	366	0	366	Wong&Brewer, 1977	Chance 2014	Appendix table 4
AII-79	2033	AII-79_2033_737	13.3667	-64.7167	737	0	492	492	Wong&Brewer, 1977	Chance 2014	Appendix table 1
AII-79	2038	AII-79_2038_737	10.5167	-64.75	737	434	0	434	Wong&Brewer, 1977	Chance 2014	Appendix table 3
AII-79	2033	AII-79_2033_780	13.3667	-64.7167	780	0	467	467	Wong&Brewer, 1977	Chance 2014	Appendix table 1
AII-79	2038	AII-79_2038_786	10.5167	-64.75	786	322	0	322	Wong&Brewer, 1977	Chance 2014	Appendix table 3
AII-79	2033	AII-79_2033_838	13.3667	-64.7167	838	0	480	480	Wong&Brewer, 1977	Chance 2014	Appendix table 1
AII-79	2033	AII-79_2033_878	13.3667	-64.7167	878	0	471	471	Wong&Brewer, 1977	Chance 2014	Appendix table 1
AII-79	2038	AII-79_2038_882	10.5167	-64.75	882	376	0	376	Wong&Brewer, 1977	Chance 2014	Appendix table 3
AII-79	2038	AII-79_2038_934	10.5167	-64.75	934	461	0	461	Wong&Brewer, 1977	Chance 2014	Appendix table 3
CHAIN-120	1355	CHAIN-120_1355_973	42.8333	33	973	357	0	357	Wong&Brewer, 1977	Chance 2014	Appendix table 4
AII-79	2033	AII-79_2033_976	13.3667	-64.7167	976	1	476	477	Wong&Brewer, 1977	Chance 2014	Appendix table 1
AII-79	2038	AII-79_2038_1031	10.5167	-64.75	1031	456	0	456	Wong&Brewer, 1977	Chance 2014	Appendix table 3
AII-79	2038	AII-79_2038_1173	10.5167	-64.75	1173	409	0	409	Wong&Brewer, 1977	Chance 2014	Appendix table 3
CHAIN-120	1355	CHAIN-120_1355_1371	42.8333	33	1371	303	0	303	Wong&Brewer, 1977	Chance 2014	Appendix table 4
AII-79	2033	AII-79_2033_1460	13.3667	-64.7167	1460	2	430	432	Wong&Brewer, 1977	Chance 2014	Appendix table 1
AII-79	2033	AII-79_2033_1706	13.3667	-64.7167	1706	4	444	448	Wong&Brewer, 1977	Chance 2014	Appendix table 1
CHAIN-120	1355	CHAIN-120_1355_1746	42.8333	33	1746	433	0	433	Wong&Brewer, 1977	Chance 2014	Appendix table 4
CHAIN-120	1355	CHAIN-120_1355_1943	42.8333	33	1943	432	0	432	Wong&Brewer, 1977	Chance 2014	Appendix table 4
AII-79	2033	AII-79_2033_1955	13.3667	-64.7167	1955	0	462	462	Wong&Brewer, 1977	Chance 2014	Appendix table 1
AII-79	2033	AII-79_2033_2167	13.3667	-64.7167	2167	0	466	466	Wong&Brewer, 1977	Chance 2014	Appendix table 1
AII-79	2033	AII-79_2033_2425	13.3667	-64.7167	2425	6	476	482	Wong&Brewer, 1977	Chance 2014	Appendix table 1
AII-79	2033	AII-79_2033_2478	13.3667	-64.7167	2478	0	471	471	Wong&Brewer, 1977	Chance 2014	Appendix table 1
AII-79	2033	AII-79_2033_2663	13.3667	-64.7167	2663	0	474	474	Wong&Brewer, 1977	Chance 2014	Appendix table 1
AII-79	2033	AII-79_2033_2692	13.3667	-64.7167	2692	0	473	473	Wong&Brewer, 1977	Chance 2014	Appendix table 1
AII-79	2033	AII-79_2033_2810	13.3667	-64.7167	2810	1	462	463	Wong&Brewer, 1977	Chance 2014	Appendix table 1
AII-79	2033	AII-79_2033_2925	13.3667	-64.7167	2925	0	488	488	Wong&Brewer, 1977	Chance 2014	Appendix table 1
AII-79	2033	AII-79_2033_3156	13.3667	-64.7167	3156	1	465	466	Wong&Brewer, 1977	Chance 2014	Appendix table 1
AII-79	2033	AII-79_2033_3383	13.3667	-64.7167	3383	0	460	460	Wong&Brewer, 1977	Chance 2014	Appendix table 1
AII-79	2033	AII-79_2033_3409	13.3667	-64.7167	3409	0	471	471	Wong&Brewer, 1977	Chance 2014	Appendix table 1
AII-79	2033	AII-79_2033_3666	13.3667	-64.7167	3666	0	481	481	Wong&Brewer, 1977	Chance 2014	Appendix table 1
AII-79	2033	AII-79_2033_3670	13.3667	-64.7167	3670	0	476	476	Wong&Brewer, 1977	Chance 2014	Appendix table 1
AII-79	2033	AII-79_2033_3915	13.3667	-64.7167	3915	0	484	484	Wong&Brewer, 1977	Chance 2014	Appendix table 1
AII-79	2033	AII-79_2033_4209	13.3667	-64.7167	4209	0	475	475	Wong&Brewer, 1977	Chance 2014	Appendix table 1
Campos96	BATS	Campos96_BATS_2	31.6667	-64.1667	2	120	360	485	Campos, M. L. A. M., Farrenkopf, A. M., Jickells, T. D. & Luther, G. W. A. comparison of dissolved iodine cycling at the Bermuda Atlantic Time-series Station and Hawaii Ocean Time-series Station. Deep Sea Res. Part II Top. Stud. Oceanogr. 43, 455-466 (1996).	Chance 2014	Figure 1 B
Campos96	BATS	Campos96_BATS_2	31.6667	-64.1667	2	110	390	500	Campos, M. L. A. M., Farrenkopf, A. M., Jickells, T. D. & Luther, G. W. A. comparison of dissolved iodine cycling at the Bermuda Atlantic Time-series Station and Hawaii Ocean Time-series Station. Deep Sea Res. Part II Top. Stud. Oceanogr. 43, 455-466 (1996).	Chance 2014	Figure 1 B
Campos96	BATS	Campos96_BATS_2	31.6667	-64.1667	2	100	370	480	Campos, M. L. A. M., Farrenkopf, A. M., Jickells, T. D. & Luther, G. W. A. comparison of dissolved iodine cycling at the Bermuda Atlantic Time-series Station and Hawaii Ocean Time-series Station. Deep Sea Res. Part II Top. Stud. Oceanogr. 43, 455-466 (1996).	Chance 2014	Figure 1 B
Campos96	BATS	Campos96_BATS_2	31.6667	-64.1667	2	100	400	500	Campos, M. L. A. M., Farrenkopf, A. M., Jickells, T. D. & Luther, G. W. A. comparison of dissolved iodine cycling at the Bermuda Atlantic Time-series Station and Hawaii Ocean Time-series Station. Deep Sea Res. Part II Top. Stud. Oceanogr. 43, 455-466 (1996).	Chance 2014	Figure 1 B
Campos96	BATS	Campos96_BATS_2	31.6667	-64.1667	2	120	310	450	Campos, M. L. A. M., Farrenkopf, A. M., Jickells, T. D. & Luther, G. W. A. comparison of dissolved iodine cycling at the Bermuda Atlantic Time-series Station and Hawaii Ocean Time-series Station. Deep Sea Res. Part II Top. Stud. Oceanogr. 43, 455-466 (1996).	Chance 2014	Figure 1 B
Campos96	BATS	Campos96_BATS_2	31.6667	-64.1667	2	110	380	500	Campos, M. L. A. M., Farrenkopf, A. M., Jickells, T. D. & Luther, G. W. A. comparison of dissolved iodine cycling at the Bermuda Atlantic Time-series Station and Hawaii Ocean Time-series Station. Deep Sea Res. Part II Top. Stud. Oceanogr. 43, 455-466 (1996).	Chance 2014	Figure 1 B
Campos96	BATS	Campos96_BATS_2	31.6667	-64.1667	2	110	390	500	Campos, M. L. A. M., Farrenkopf, A. M., Jickells, T. D. & Luther, G. W. A. comparison of dissolved iodine cycling at the Bermuda Atlantic Time-series Station and Hawaii Ocean Time-series Station. Deep Sea Res. Part II Top. Stud. Oceanogr. 43, 455-466 (1996).	Chance 2014	Figure 1 B
Campos96	BATS	Campos96_BATS_2	31.6667	-64.1667	2	110	340	470	Campos, M. L. A. M., Farrenkopf, A. M., Jickells, T. D. & Luther, G. W. A. comparison of dissolved iodine cycling at the Bermuda Atlantic Time-series Station and Hawaii Ocean Time-series Station. Deep Sea Res. Part II Top. Stud. Oceanogr. 43, 455-466 (1996).	Chance 2014	Figure 1 B
Campos96	HOTS	Campos96_HOTS_2	22.75	-158	2	200	300	430	Campos, M. L. A. M., Farrenkopf, A. M., Jickells, T. D. & Luther, G. W. A. comparison of dissolved iodine cycling at the Bermuda Atlantic Time-series Station and Hawaii Ocean Time-series Station. Deep Sea Res. Part II Top. Stud. Oceanogr. 43, 455-466 (1996).	Chance 2014	Figure 1 A
Campos96	HOTS	Campos96_HOTS_2	22.75	-158	2	380		430	Campos, M. L. A. M., Farrenkopf, A. M., Jickells, T. D. & Luther, G. W. A. comparison of dissolved iodine cycling at the Bermuda Atlantic Time-series Station and Hawaii Ocean Time-series Station. Deep Sea Res. Part II Top. Stud. Oceanogr. 43, 455-466 (1996).	Chance 2014	Figure 1 A
Campos96	HOTS	Campos96_HOTS_2	22.75	-158	2	290	100	390	Campos, M. L. A. M., Farrenkopf, A. M., Jickells, T. D. & Luther, G. W. A. comparison of dissolved iodine cycling at the Bermuda Atlantic Time-series Station and Hawaii Ocean Time-series Station. Deep Sea Res. Part II Top. Stud. Oceanogr. 43, 455-466 (1996).	Chance 2014	Figure 1 A
Campos96	HOTS	Campos96_HOTS_2	22.75	-158	2	200	290	480	Campos, M. L. A. M., Farrenkopf, A. M., Jickells, T. D. & Luther, G. W. A. comparison of dissolved iodine cycling at the Bermuda Atlantic Time-series Station and Hawaii Ocean Time-series Station. Deep Sea Res. Part II Top. Stud. Oceanogr. 43, 455-466 (1996).	Chance 2014	Figure 1 A
Campos96	HOTS	Campos96_HOTS_2	22.75	-158	2	180	300	480	Campos, M. L. A. M., Farrenkopf, A. M., Jickells, T. D. & Luther, G. W. A. comparison of dissolved iodine cycling at the Bermuda Atlantic Time-series Station and Hawaii Ocean Time-series Station. Deep Sea Res. Part II Top. Stud. Oceanogr. 43, 455-466 (1996).	Chance 2014	Figure 1 A
Campos96	HOTS	Campos96_HOTS_2	22.75	-158	2	250	250	500	Campos, M. L. A. M., Farrenkopf, A. M., Jickells, T. D. & Luther, G. W. A. comparison of dissolved iodine cycling at the Bermuda Atlantic Time-series Station and Hawaii Ocean Time-series Station. Deep Sea Res. Part II Top. Stud. Oceanogr. 43, 455-466 (1996).	Chance 2014	Figure 1 A
Campos96	HOTS		22.75	-158	5	200	285	432	Campos 1996		Figure 1 A
Campos96	HOTS		22.75	-158	25	260	287	500	Campos 1996		Figure 1 A
Campos96	HOTS		22.75	-158	40	270	295	456	Campos 1996		Figure 1 A
Campos96	HOTS		22.75	-158	75	240	215	453	Campos 1996		Figure 1 A
Campos96	HOTS		22.75	-158	100	200		461	Campos 1996		Figure 1 A
Campos96	HOTS		22.75	-158	125	135	286	445	Campos 1996		Figure 1 A
Campos96	HOTS		22.75	-158	150	160	360	425	Campos 1996		Figure 1 A
Campos96	HOTS		22.75	-158	175	120	410	480	Campos 1996		Figure 1 A
Campos96	HOTS		22.75	-158	5	367		432	Campos 1996		Figure 1 A
Campos96	HOTS		22.75	-158	25	257	287	400	Campos 1996		Figure 1 A
Campos96	HOTS		22.75	-158	45	241	314	440	Campos 1996		Figure 1 A
Campos96	HOTS		22.75	-158	75	194	256	430	Campos 1996		Figure 1 A
Campos96	HOTS		22.75	-158	100	90	210	443	Campos 1996		Figure 1 A
Campos96	HOTS		22.75	-158	125	65	238		Campos 1996		Figure 1 A
Campos96	HOTS		22.75	-158	150	29		447	Campos 1996		Figure 1 A
Campos96	HOTS		22.75	-158	175	23	313	485	Campos 1996		Figure 1 A
Campos96	HOTS		22.75	-158	270	0	462		Campos 1996		Figure 1 A
Campos96	HOTS		22.75	-158	315	12	397		Campos 1996		Figure 1 A
Campos96	HOTS		22.75	-158	370	13	430		Campos 1996		Figure 1 A
Campos96	HOTS		22.75	-158	540	2			Campos 1996		Figure 1 A
Campos96	HOTS		22.75	-158	10	280	100	378	Campos 1996		Figure 1 A
Campos96	HOTS		22.75	-158	25	230	158	393	Campos 1996		Figure 1 A
Campos96	HOTS		22.75	-158	50	145	330	480	Campos 1996		Figure 1 A
Campos96	HOTS		22.75	-158	75	200	208	413	Campos 1996		Figure 1 A
Campos96	HOTS		22.75	-158	100	270	136	407	Campos 1996		Figure 1 A
Campos96	HOTS		22.75	-158	125	190	300	489	Campos 1996		Figure 1 A
Campos96	HOTS		22.75	-158	150	200	230	430	Campos 1996		Figure 1 A
Campos96	HOTS		22.75	-158	175	195	200	394	Campos 1996		Figure 1 A
Campos96	HOTS		22.75	-158	250	14	370	383	Campos 1996		Figure 1 A
Campos96	HOTS		22.75	-158	500	2	468	470	Campos 1996		Figure 1 A
Campos96	HOTS		22.75	-158	5	192	280	475	Campos 1996		Figure 1 A
Campos96	HOTS		22.75	-158	25	200	243	444	Campos 1996		Figure 1 A
Campos96	HOTS		22.75	-158	50	256	108	363	Campos 1996		Figure 1 A
Campos96	HOTS		22.75	-158	75	210	275	485	Campos 1996		Figure 1 A
Campos96	HOTS		22.75	-158	100	210	216	420	Campos 1996		Figure 1 A
Campos96	HOTS		22.75	-158	125	212	303	518	Campos 1996		Figure 1 A
Campos96	HOTS		22.75	-158	50	75	364	441	Campos 1996		Figure 1 A
Campos96	HOTS		22.75	-158	175	20	422	441	Campos 1996		Figure 1 A
Campos96	HOTS		22.75	-158	250	14	447	457	Campos 1996		Figure 1 A
Campos96	HOTS		22.75	-158	500	0	464	472	Campos 1996		Figure 1 A
Campos96	HOTS		22.75	-158	5	175	300	472	Campos 1996		Figure 1 A
Campos96	HOTS		22.75	-158	25	186	212	403	Campos 1996		Figure 1 A
Campos96	HOTS		22.75	-158	50	200	245	456	Campos 1996		Figure 1 A
Campos96	HOTS		22.75	-158	75	130	300	437	Campos 1996		Figure 1 A
Campos96	HOTS		22.75	-158	100	166	260	430	Campos 1996		Figure 1 A
Campos96	HOTS		22.75	-158	125	192	216	417	Campos 1996		Figure 1 A
Campos96	HOTS		22.75	-158	150	156	315	473	Campos 1996		Figure 1 A
Campos96	HOTS		22.75	-158	175	126	332	465	Campos 1996		Figure 1 A
Campos96	HOTS		22.75	-158	250	13	450	460	Campos 1996		Figure 1 A
Campos96	HOTS		22.75	-158	500	0	428	431	Campos 1996		Figure 1 A
Campos96	HOTS		22.75	-158	5	245	250	495	Campos 1996		Figure 1 A
Campos96	HOTS		22.75	-158	25	206	206	415	Campos 1996		Figure 1 A
Campos96	HOTS		22.75	-158	50	190	350	530	Campos 1996		Figure 1 A
Campos96	HOTS		22.75	-158	75	218	230	450	Campos 1996		Figure 1 A
Campos96	HOTS		22.75	-158	100	188	330	513	Campos 1996		Figure 1 A
Campos96	HOTS		22.75	-158	125	150	316	450	Campos 1996		Figure 1 A
Campos96	HOTS		22.75	-158	150	140	295	430	Campos 1996		Figure 1 A
Campos96	HOTS		22.75	-158	175	123	533	463	Campos 1996		Figure 1 A
Campos96	HOTS		22.75	-158	250	22	415	435	Campos 1996		Figure 1 A
Campos96	HOTS		22.75	-158	500	6	533	533	Campos 1996		Figure 1 A
Campos96	BATS		31.6667	-64.1667	0	134	360	480	Campos 1996		Figure 1 B
Campos96	BATS		31.6667	-64.1667	15	97			Campos 1996		Figure 1 B
Campos96	BATS		31.6667	-64.1667	25		373	476	Campos 1996		Figure 1 B
Campos96	BATS		31.6667	-64.1667	40	71	406		Campos 1996		Figure 1 B
Campos96	BATS		31.6667	-64.1667	45	75		480	Campos 1996		Figure 1 B
Campos96	BATS		31.6667	-64.1667	50	78			Campos 1996		Figure 1 B
Campos96	BATS		31.6667	-64.1667	55	78	366	450	Campos 1996		Figure 1 B
Campos96	BATS		31.6667	-64.1667	80	65	353	433	Campos 1996		Figure 1 B
Campos96	BATS		31.6667	-64.1667	100	76	376	466	Campos 1996		Figure 1 B
Campos96	BATS		31.6667	-64.1667	120	74			Campos 1996		Figure 1 B
Campos96	BATS		31.6667	-64.1667	140	20	409	425	Campos 1996		Figure 1 B
Campos96	BATS		31.6667	-64.1667	160	15	420	440	Campos 1996		Figure 1 B
Campos96	BATS		31.6667	-64.1667	200	20	423	450	Campos 1996		Figure 1 B
Campos96	BATS		31.6667	-64.1667	250	3	460	460	Campos 1996		Figure 1 B
Campos96	BATS		31.6667	-64.1667	300	8	510	520	Campos 1996		Figure 1 B
Campos96	BATS		31.6667	-64.1667	400	5	432	441	Campos 1996		Figure 1 B
Campos96	BATS		31.6667	-64.1667	500		456	460	Campos 1996		Figure 1 B
Campos96	BATS		31.6667	-64.1667	0	117	377	500	Campos 1996		Figure 1 B
Campos96	BATS		31.6667	-64.1667	10	106	403	511	Campos 1996		Figure 1 B
Campos96	BATS		31.6667	-64.1667	15	110			Campos 1996		Figure 1 B
Campos96	BATS		31.6667	-64.1667	20	120	388	511	Campos 1996		Figure 1 B
Campos96	BATS		31.6667	-64.1667	40	95	407	507	Campos 1996		Figure 1 B
Campos96	BATS		31.6667	-64.1667	60	113	360	575	Campos 1996		Figure 1 B
Campos96	BATS		31.6667	-64.1667	80	113	349	460	Campos 1996		Figure 1 B
Campos96	BATS		31.6667	-64.1667	100	104	377	492	Campos 1996		Figure 1 B
Campos96	BATS		31.6667	-64.1667	120	64	410	479	Campos 1996		Figure 1 B
Campos96	BATS		31.6667	-64.1667	140	42	425	479	Campos 1996		Figure 1 B
Campos96	BATS		31.6667	-64.1667	160	16	492	510	Campos 1996		Figure 1 B
Campos96	BATS		31.6667	-64.1667	200	12	536	543	Campos 1996		Figure 1 B
Campos96	BATS		31.6667	-64.1667	250	3	470	480	Campos 1996		Figure 1 B
Campos96	BATS		31.6667	-64.1667	400	6	502	511	Campos 1996		Figure 1 B
Campos96	BATS		31.6667	-64.1667	500	3	458	471	Campos 1996		Figure 1 B
Campos96	BATS		31.6667	-64.1667	600	11	450	465	Campos 1996		Figure 1 B
Campos96	BATS		31.6667	-64.1667	0	110	367	476	Campos 1996		Figure 1 B
Campos96	BATS		31.6667	-64.1667	20	110	359	472	Campos 1996		Figure 1 B
Campos96	BATS		31.6667	-64.1667	40	110	408	524	Campos 1996		Figure 1 B
Campos96	BATS		31.6667	-64.1667	50	116	356	481	Campos 1996		Figure 1 B
Campos96	BATS		31.6667	-64.1667	55	103	360		Campos 1996		Figure 1 B
Campos96	BATS		31.6667	-64.1667	60	97	361	466	Campos 1996		Figure 1 B
Campos96	BATS		31.6667	-64.1667	80	86	400	493	Campos 1996		Figure 1 B
Campos96	BATS		31.6667	-64.1667	100	112	365	479	Campos 1996		Figure 1 B
Campos96	BATS		31.6667	-64.1667	120	80	410	498	Campos 1996		Figure 1 B
Campos96	BATS		31.6667	-64.1667	140	70	410	483	Campos 1996		Figure 1 B
Campos96	BATS		31.6667	-64.1667	160	43	430	474	Campos 1996		Figure 1 B
Campos96	BATS		31.6667	-64.1667	200	6	478	490	Campos 1996		Figure 1 B
Campos96	BATS		31.6667	-64.1667	250	4	506	513	Campos 1996		Figure 1 B
Campos96	BATS		31.6667	-64.1667	300	4	461	476	Campos 1996		Figure 1 B
Campos96	BATS		31.6667	-64.1667	400	0	476	485	Campos 1996		Figure 1 B
Campos96	BATS		31.6667	-64.1667	500	2	498	500	Campos 1996		Figure 1 B
Campos96	BATS		31.6667	-64.1667	0	91	109	502	Campos 1996		Figure 1 B
Campos96	BATS		31.6667	-64.1667	5	81	384	479	Campos 1996		Figure 1 B
Campos96	BATS		31.6667	-64.1667	10	85			Campos 1996		Figure 1 B
Campos96	BATS		31.6667	-64.1667	20	85	392	488	Campos 1996		Figure 1 B
Campos96	BATS		31.6667	-64.1667	40	90	367	458	Campos 1996		Figure 1 B
Campos96	BATS		31.6667	-64.1667	60	98	340	467	Campos 1996		Figure 1 B
Campos96	BATS		31.6667	-64.1667	80	97	380	484	Campos 1996		Figure 1 B
Campos96	BATS		31.6667	-64.1667	100	93			Campos 1996		Figure 1 B
Campos96	BATS		31.6667	-64.1667	120	93	330	432	Campos 1996		Figure 1 B
Campos96	BATS		31.6667	-64.1667	140	108	333	454	Campos 1996		Figure 1 B
Campos96	BATS		31.6667	-64.1667	160	113	380	495	Campos 1996		Figure 1 B
Campos96	BATS		31.6667	-64.1667	200	84	385	463	Campos 1996		Figure 1 B
Campos97	BATS		31.6667	-64.1667	250	78			Campos 1996		Figure 1 B
Campos98	BATS		31.6667	-64.1667	300	92	405	497	Campos 1996		Figure 1 B
Campos99	BATS		31.6667	-64.1667	400	11	500	507	Campos 1996		Figure 1 B
Campos100	BATS		31.6667	-64.1667	500	13	492	496	Campos 1996		Figure 1 B
Campos101	BATS		31.6667	-64.1667	0	123	317	443	Campos 1996		Figure 1 B
Campos102	BATS		31.6667	-64.1667	20	126	337	459	Campos 1996		Figure 1 B
Campos103	BATS		31.6667	-64.1667	40	130	322	459	Campos 1996		Figure 1 B
Campos104	BATS		31.6667	-64.1667	50	120	350	470	Campos 1996		Figure 1 B
Campos105	BATS		31.6667	-64.1667	60	100	393	496	Campos 1996		Figure 1 B
Campos106	BATS		31.6667	-64.1667	80	106	364	470	Campos 1996		Figure 1 B
Campos107	BATS		31.6667	-64.1667	100	96	393	498	Campos 1996		Figure 1 B
Campos108	BATS		31.6667	-64.1667	120	90	400	492	Campos 1996		Figure 1 B
Campos109	BATS		31.6667	-64.1667	140	85	396	481	Campos 1996		Figure 1 B
Campos110	BATS		31.6667	-64.1667	160	37	435	477	Campos 1996		Figure 1 B
Campos111	BATS		31.6667	-64.1667	200	15	465	477	Campos 1996		Figure 1 B
Campos112	BATS		31.6667	-64.1667	250	15	462	471	Campos 1996		Figure 1 B
Campos113	BATS		31.6667	-64.1667	300	12	496	507	Campos 1996		Figure 1 B
Campos114	BATS		31.6667	-64.1667	400	12	481	484	Campos 1996		Figure 1 B
Campos115	BATS		31.6667	-64.1667	500	15	484	498	Campos 1996		Figure 1 B
Campos116	BATS		31.6667	-64.1667	0	116	370	498	Campos 1996		Figure 1 B
Campos117	BATS		31.6667	-64.1667	20	123	395	520	Campos 1996		Figure 1 B
Campos118	BATS		31.6667	-64.1667	40	134	364	500	Campos 1996		Figure 1 B
Campos119	BATS		31.6667	-64.1667	50	106	380	485	Campos 1996		Figure 1 B
Campos120	BATS		31.6667	-64.1667	60	7	446	540	Campos 1996		Figure 1 B
Campos121	BATS		31.6667	-64.1667	80	86	409	503	Campos 1996		Figure 1 B
Campos122	BATS		31.6667	-64.1667	100	75	426	507	Campos 1996		Figure 1 B
Campos123	BATS		31.6667	-64.1667	120	76	391	477	Campos 1996		Figure 1 B
Campos124	BATS		31.6667	-64.1667	140	60	438	506	Campos 1996		Figure 1 B
Campos125	BATS		31.6667	-64.1667	160	36	479	521	Campos 1996		Figure 1 B
Campos126	BATS		31.6667	-64.1667	200	20	431	456	Campos 1996		Figure 1 B
Campos127	BATS		31.6667	-64.1667	250	11	482	493	Campos 1996		Figure 1 B
Campos128	BATS		31.6667	-64.1667	300	7	485	494	Campos 1996		Figure 1 B
Campos129	BATS		31.6667	-64.1667	400	12	415	430	Campos 1996		Figure 1 B
Campos130	BATS		31.6667	-64.1667	500	9	491	496	Campos 1996		Figure 1 B
Campos131	BATS		31.6667	-64.1667	0	116	381	500	Campos 1996		Figure 1 B
Campos132	BATS		31.6667	-64.1667	20	119	382	502	Campos 1996		Figure 1 B
Campos133	BATS		31.6667	-64.1667	40	128	390	515	Campos 1996		Figure 1 B
Campos134	BATS		31.6667	-64.1667	50	104		505	Campos 1996		Figure 1 B
Campos135	BATS		31.6667	-64.1667	55	96			Campos 1996		Figure 1 B
Campos136	BATS		31.6667	-64.1667	60	90	405	496	Campos 1996		Figure 1 B
Campos137	BATS		31.6667	-64.1667	80	9	427	522	Campos 1996		Figure 1 B
Campos138	BATS		31.6667	-64.1667	100	98	408	512	Campos 1996		Figure 1 B
Campos139	BATS		31.6667	-64.1667	120	74	418	493	Campos 1996		Figure 1 B
Campos140	BATS		31.6667	-64.1667	140	63	417	485	Campos 1996		Figure 1 B
Campos141	BATS		31.6667	-64.1667	160	61	415	477	Campos 1996		Figure 1 B
Campos142	BATS		31.6667	-64.1667	200	56	466	524	Campos 1996		Figure 1 B
Campos143	BATS		31.6667	-64.1667	250	48	448	500	Campos 1996		Figure 1 B
Campos144	BATS		31.6667	-64.1667	300	17	460	479	Campos 1996		Figure 1 B
Campos145	BATS		31.6667	-64.1667	400	14	488	497	Campos 1996		Figure 1 B
Campos146	BATS		31.6667	-64.1667	500	17	506	515	Campos 1996		Figure 1 B
Campos147	BATS		31.6667	-64.1667	0	116	341	462	Campos 1996		Figure 1 B
Campos148	BATS		31.6667	-64.1667	20	102	326	464	Campos 1996		Figure 1 B
Campos149	BATS		31.6667	-64.1667	40	76	390	464	Campos 1996		Figure 1 B
Campos150	BATS		31.6667	-64.1667	60	77	333	413	Campos 1996		Figure 1 B
Campos151	BATS		31.6667	-64.1667	80	94	415	509	Campos 1996		Figure 1 B
Campos152	BATS		31.6667	-64.1667	100	66	407	477	Campos 1996		Figure 1 B
Campos153	BATS		31.6667	-64.1667	120	60	242	490	Campos 1996		Figure 1 B
Campos154	BATS		31.6667	-64.1667	155	60	440	492	Campos 1996		Figure 1 B
Campos155	BATS		31.6667	-64.1667	165	50	397	445	Campos 1996		Figure 1 B
Campos156	BATS		31.6667	-64.1667	200	35	400	435	Campos 1996		Figure 1 B
Campos157	BATS		31.6667	-64.1667	250	26	450	474	Campos 1996		Figure 1 B
Campos158	BATS		31.6667	-64.1667	300	14	457	471	Campos 1996		Figure 1 B
Campos159	BATS		31.6667	-64.1667	400	4	453	460	Campos 1996		Figure 1 B
Campos160	BATS		31.6667	-64.1667	500	4	456	456	Campos 1996		Figure 1 B
ALGOA48	average	ALGOA48_average_3	-33	17.75	3	48	380	428	Truesdale, V. W. & Bailey, G. . Iodine distribution in the Southern Benguela system during an upwelling episode. Cont. Shelf Res. 22, 39-49 (2002).	Chance 2014	Total iodine written in paper and iodate assumed from variation descirbed at 0.02uM through the water column near surface
ALGOA48	average	ALGOA48_average_100	-33	17.75	100	48	400	448	Truesdale&Bailey, 2002	Chance 2014	Written in the paper - not included in a figure
ALGOA48	18		-33	17.75	2				Truesdale and Bailey 2002		Figure 3
ALGOA48	18		-33	17.75	6				Truesdale and Bailey 2002		Figure 3
ALGOA48	18		-33	17.75	8				Truesdale and Bailey 2002		Figure 3
ALGOA48	18		-33	17.75	15				Truesdale and Bailey 2002		Figure 3
ALGOA48	18		-33	17.75	20				Truesdale and Bailey 2002		Figure 3
ALGOA48	18		-33	17.75	30				Truesdale and Bailey 2002		Figure 3
ALGOA48	18		-33	17.75	35				Truesdale and Bailey 2002		Figure 3
ALGOA48	18		-33	17.75	40				Truesdale and Bailey 2002		Figure 3
ALGOA48	18		-33	17.75	45				Truesdale and Bailey 2002		Figure 3
ALGOA48	18		-33	17.75	80				Truesdale and Bailey 2002		Figure 3
ALGOA48	18		-33	17.75	100				Truesdale and Bailey 2002		Figure 3
ALGOA48	20		-33	17.75	2				Truesdale and Bailey 2002		Figure 3
ALGOA48	20		-33	17.75	4				Truesdale and Bailey 2002		Figure 3
ALGOA48	20		-33	17.75	5				Truesdale and Bailey 2002		Figure 3
ALGOA48	20		-33	17.75	10				Truesdale and Bailey 2002		Figure 3
ALGOA48	20		-33	17.75	15				Truesdale and Bailey 2002		Figure 3
ALGOA48	20		-33	17.75	25				Truesdale and Bailey 2002		Figure 3
ALGOA48	20		-33	17.75	30				Truesdale and Bailey 2002		Figure 3
ALGOA48	20		-33	17.75	50				Truesdale and Bailey 2002		Figure 3
ALGOA48	20		-33	17.75	60				Truesdale and Bailey 2002		Figure 3
ALGOA48	20		-33	17.75	80				Truesdale and Bailey 2002		Figure 3
ALGOA48	22		-33	17.75	2				Truesdale and Bailey 2002		Figure 3
ALGOA48	22		-33	17.75	6				Truesdale and Bailey 2002		Figure 3
ALGOA48	22		-33	17.75	15				Truesdale and Bailey 2002		Figure 3
ALGOA48	22		-33	17.75	20				Truesdale and Bailey 2002		Figure 3
ALGOA48	22		-33	17.75	50				Truesdale and Bailey 2002		Figure 3
ALGOA48	22		-33	17.75	100				Truesdale and Bailey 2002		Figure 3
ALGOA48	22		-33	17.75	125				Truesdale and Bailey 2002		Figure 3
ALGOA48	18		-33	17.75	2				Truesdale and Bailey 2002		Figure 3
ALGOA48	18		-33	17.75	4				Truesdale and Bailey 2002		Figure 3
ALGOA48	18		-33	17.75	6				Truesdale and Bailey 2002		Figure 3
ALGOA48	18		-33	17.75	8				Truesdale and Bailey 2002		Figure 3
ALGOA48	18		-33	17.75	10				Truesdale and Bailey 2002		Figure 3
ALGOA48	18		-33	17.75	15				Truesdale and Bailey 2002		Figure 3
ALGOA48	18		-33	17.75	25				Truesdale and Bailey 2002		Figure 3
ALGOA48	18		-33	17.75	25				Truesdale and Bailey 2002		Figure 3
ALGOA48	18		-33	17.75	30				Truesdale and Bailey 2002		Figure 3
ALGOA48	18		-33	17.75	35				Truesdale and Bailey 2002		Figure 3
ALGOA48	18		-33	17.75	40				Truesdale and Bailey 2002		Figure 3
ALGOA48	18		-33	17.75	80				Truesdale and Bailey 2002		Figure 3
ALGOA48	18		-33	17.75	100				Truesdale and Bailey 2002		Figure 3
ALGOA48	20		-33	17.75	2				Truesdale and Bailey 2002		Figure 3
ALGOA48	20		-33	17.75	4				Truesdale and Bailey 2002		Figure 3
ALGOA48	20		-33	17.75	8				Truesdale and Bailey 2002		Figure 3
ALGOA48	20		-33	17.75	10				Truesdale and Bailey 2002		Figure 3
ALGOA48	20		-33	17.75	20				Truesdale and Bailey 2002		Figure 3
ALGOA48	20		-33	17.75	25				Truesdale and Bailey 2002		Figure 3
ALGOA48	20		-33	17.75	30				Truesdale and Bailey 2002		Figure 3
ALGOA48	20		-33	17.75	35				Truesdale and Bailey 2002		Figure 3
ALGOA48	20		-33	17.75	50				Truesdale and Bailey 2002		Figure 3
ALGOA48	20		-33	17.75	60				Truesdale and Bailey 2002		Figure 3
ALGOA48	20		-33	17.75	80				Truesdale and Bailey 2002		Figure 3
ALGOA48	22		-33	17.75	2				Truesdale and Bailey 2002		Figure 3
ALGOA48	22		-33	17.75	8				Truesdale and Bailey 2002		Figure 3
ALGOA48	22		-33	17.75	15				Truesdale and Bailey 2002		Figure 3
ALGOA48	22		-33	17.75	20				Truesdale and Bailey 2002		Figure 3
ALGOA48	22		-33	17.75	30				Truesdale and Bailey 2002		Figure 3
ALGOA48	22		-33	17.75	50				Truesdale and Bailey 2002		Figure 3
ALGOA48	22		-33	17.75	80				Truesdale and Bailey 2002		Figure 3
ALGOA48	22		-33	17.75	100				Truesdale and Bailey 2002		Figure 3
ALGOA48	22		-33	17.75	125				Truesdale and Bailey 2002		Figure 3
DYFAMED	1993-07-01	DYFAMED_July93_5	43.4167	7.86667	5	50	423	473	Tian, R. C. et al. Iodine speciation: a potential indicator to evaluate new production versus regenerated production. Deep Sea Res. Part I Oceanogr. Res. Pap. 43, 723-738 (1996).; Tian, R. C. & Nicolas, E. Iodine speciation in the northwestern Mediterranean Sea, method and vertical profile. Mar. Chem. 48, 151-156 (1995); http://doi.pangaea.de/10.1594/PANGAEA.174586.	Chance 2014	Tables 1, 2, and 3, Figure 2
DYFAMED	1994-01-01	DYFAMED_Jan94_5	43.4167	7.86667	5	25	448	473	Tian, R. C. et al. Iodine speciation: a potential indicator to evaluate new production versus regenerated production. Deep Sea Res. Part I Oceanogr. Res. Pap. 43, 723-738 (1996).; Tian, R. C. & Nicolas, E. Iodine speciation in the northwestern Mediterranean Sea, method and vertical profile. Mar. Chem. 48, 151-156 (1995); http://doi.pangaea.de/10.1594/PANGAEA.174586.	Chance 2014	Tables 1, 2, and 3, Figure 2
DYFAMED	1994-02-01	DYFAMED_Feb94_5	43.4167	7.86667	5	20	451	471	Tian, R. C. et al. Iodine speciation: a potential indicator to evaluate new production versus regenerated production. Deep Sea Res. Part I Oceanogr. Res. Pap. 43, 723-738 (1996).; Tian, R. C. & Nicolas, E. Iodine speciation in the northwestern Mediterranean Sea, method and vertical profile. Mar. Chem. 48, 151-156 (1995); http://doi.pangaea.de/10.1594/PANGAEA.174586.	Chance 2014	Tables 1, 2, and 3, Figure 2
DYFAMED	1994-03-01	DYFAMED_March94_5	43.4167	7.86667	5	22	450	472	Tian, R. C. et al. Iodine speciation: a potential indicator to evaluate new production versus regenerated production. Deep Sea Res. Part I Oceanogr. Res. Pap. 43, 723-738 (1996).; Tian, R. C. & Nicolas, E. Iodine speciation in the northwestern Mediterranean Sea, method and vertical profile. Mar. Chem. 48, 151-156 (1995); http://doi.pangaea.de/10.1594/PANGAEA.174586.	Chance 2014	Tables 1, 2, and 3, Figure 2
DYFAMED	1994-04-01	DYFAMED_Apr94_5	43.4167	7.86667	5	24	451	475	Tian, R. C. et al. Iodine speciation: a potential indicator to evaluate new production versus regenerated production. Deep Sea Res. Part I Oceanogr. Res. Pap. 43, 723-738 (1996).; Tian, R. C. & Nicolas, E. Iodine speciation in the northwestern Mediterranean Sea, method and vertical profile. Mar. Chem. 48, 151-156 (1995); http://doi.pangaea.de/10.1594/PANGAEA.174586.	Chance 2014	Tables 1, 2, and 3, Figure 2, 3, and 7
DYFAMED	1994-05-01	DYFAMED_May94_5	43.4167	7.86667	5	35	440	475	Tian, R. C. et al. Iodine speciation: a potential indicator to evaluate new production versus regenerated production. Deep Sea Res. Part I Oceanogr. Res. Pap. 43, 723-738 (1996).; Tian, R. C. & Nicolas, E. Iodine speciation in the northwestern Mediterranean Sea, method and vertical profile. Mar. Chem. 48, 151-156 (1995); http://doi.pangaea.de/10.1594/PANGAEA.174586.	Chance 2014	Tables 1, 2, and 3, Figure 2
DYFAMED	1994-06-01	DYFAMED_Jun94_5	43.4167	7.86667	5	41	432	473	Tian, R. C. et al. Iodine speciation: a potential indicator to evaluate new production versus regenerated production. Deep Sea Res. Part I Oceanogr. Res. Pap. 43, 723-738 (1996).; Tian, R. C. & Nicolas, E. Iodine speciation in the northwestern Mediterranean Sea, method and vertical profile. Mar. Chem. 48, 151-156 (1995); http://doi.pangaea.de/10.1594/PANGAEA.174586.	Chance 2014	Tables 1, 2, and 3, Figure 2, 3, and 7
DYFAMED	1993-09-01	DYFAMED_Sep93_5	43.4167	7.86667	5	59	408	467	Tian, R. C. et al. Iodine speciation: a potential indicator to evaluate new production versus regenerated production. Deep Sea Res. Part I Oceanogr. Res. Pap. 43, 723-738 (1996).; Tian, R. C. & Nicolas, E. Iodine speciation in the northwestern Mediterranean Sea, method and vertical profile. Mar. Chem. 48, 151-156 (1995); http://doi.pangaea.de/10.1594/PANGAEA.174586.	Chance 2014	Tables 1, 2, and 3, Figure 2, 3, and 7
DYFAMED	1993-11-01	DYFAMED_Nov93_5	43.4167	7.86667	5	83		470	Tian, R. C. et al. Iodine speciation: a potential indicator to evaluate new production versus regenerated production. Deep Sea Res. Part I Oceanogr. Res. Pap. 43, 723-738 (1996).; Tian, R. C. & Nicolas, E. Iodine speciation in the northwestern Mediterranean Sea, method and vertical profile. Mar. Chem. 48, 151-156 (1995); http://doi.pangaea.de/10.1594/PANGAEA.174586.	Chance 2014	Tables 1, 2, and 3, Figure 2
DYFAMED	1993-12-01	DYFAMED_Dec93_5	43.4167	7.86667	5	71			Tian, R. C. et al. Iodine speciation: a potential indicator to evaluate new production versus regenerated production. Deep Sea Res. Part I Oceanogr. Res. Pap. 43, 723-738 (1996).; Tian, R. C. & Nicolas, E. Iodine speciation in the northwestern Mediterranean Sea, method and vertical profile. Mar. Chem. 48, 151-156 (1995); http://doi.pangaea.de/10.1594/PANGAEA.174586.	Chance 2014	Tables 1, 2, and 3, Figure 2
DYFAMED	1993-07-01	DYFAMED_July93_10	43.4167	7.86667	10	49	423	472	Tian, R. C. et al. Iodine speciation: a potential indicator to evaluate new production versus regenerated production. Deep Sea Res. Part I Oceanogr. Res. Pap. 43, 723-738 (1996).; Tian, R. C. & Nicolas, E. Iodine speciation in the northwestern Mediterranean Sea, method and vertical profile. Mar. Chem. 48, 151-156 (1995); http://doi.pangaea.de/10.1594/PANGAEA.174586.	Chance 2014	Tables 1, 2, and 3, Figure 2
DYFAMED	1994-01-01	DYFAMED_Jan94_10	43.4167	7.86667	10	28	436	464	Tian, R. C. et al. Iodine speciation: a potential indicator to evaluate new production versus regenerated production. Deep Sea Res. Part I Oceanogr. Res. Pap. 43, 723-738 (1996).; Tian, R. C. & Nicolas, E. Iodine speciation in the northwestern Mediterranean Sea, method and vertical profile. Mar. Chem. 48, 151-156 (1995); http://doi.pangaea.de/10.1594/PANGAEA.174586.	Chance 2014	Tables 1, 2, and 3, Figure 2
DYFAMED	1994-02-01	DYFAMED_Feb94_10	43.4167	7.86667	10	20	453	473	Tian, R. C. et al. Iodine speciation: a potential indicator to evaluate new production versus regenerated production. Deep Sea Res. Part I Oceanogr. Res. Pap. 43, 723-738 (1996).; Tian, R. C. & Nicolas, E. Iodine speciation in the northwestern Mediterranean Sea, method and vertical profile. Mar. Chem. 48, 151-156 (1995); http://doi.pangaea.de/10.1594/PANGAEA.174586.	Chance 2014	Tables 1, 2, and 3, Figure 2, 3, and 7
DYFAMED	1994-03-01	DYFAMED_March94_10	43.4167	7.86667	10	24	444	468	Tian, R. C. et al. Iodine speciation: a potential indicator to evaluate new production versus regenerated production. Deep Sea Res. Part I Oceanogr. Res. Pap. 43, 723-738 (1996).; Tian, R. C. & Nicolas, E. Iodine speciation in the northwestern Mediterranean Sea, method and vertical profile. Mar. Chem. 48, 151-156 (1995); http://doi.pangaea.de/10.1594/PANGAEA.174586.	Chance 2014	Tables 1, 2, and 3, Figure 2
DYFAMED	1994-04-01	DYFAMED_Apr94_10	43.4167	7.86667	10	22	448	470	Tian, R. C. et al. Iodine speciation: a potential indicator to evaluate new production versus regenerated production. Deep Sea Res. Part I Oceanogr. Res. Pap. 43, 723-738 (1996).; Tian, R. C. & Nicolas, E. Iodine speciation in the northwestern Mediterranean Sea, method and vertical profile. Mar. Chem. 48, 151-156 (1995); http://doi.pangaea.de/10.1594/PANGAEA.174586.	Chance 2014	Tables 1, 2, and 3, Figure 2, 3, and 7
DYFAMED	1994-05-01	DYFAMED_May94_10	43.4167	7.86667	10	30	443	473	Tian, R. C. et al. Iodine speciation: a potential indicator to evaluate new production versus regenerated production. Deep Sea Res. Part I Oceanogr. Res. Pap. 43, 723-738 (1996).; Tian, R. C. & Nicolas, E. Iodine speciation in the northwestern Mediterranean Sea, method and vertical profile. Mar. Chem. 48, 151-156 (1995); http://doi.pangaea.de/10.1594/PANGAEA.174586.	Chance 2014	Tables 1, 2, and 3, Figure 2
DYFAMED	1994-06-01	DYFAMED_Jun94_10	43.4167	7.86667	10	37	430	467	Tian, R. C. et al. Iodine speciation: a potential indicator to evaluate new production versus regenerated production. Deep Sea Res. Part I Oceanogr. Res. Pap. 43, 723-738 (1996).; Tian, R. C. & Nicolas, E. Iodine speciation in the northwestern Mediterranean Sea, method and vertical profile. Mar. Chem. 48, 151-156 (1995); http://doi.pangaea.de/10.1594/PANGAEA.174586.	Chance 2014	Tables 1, 2, and 3, Figure 2, 3, and 7
DYFAMED	1993-09-01	DYFAMED_Sep93_10	43.4167	7.86667	10	62	406	468	Tian, R. C. et al. Iodine speciation: a potential indicator to evaluate new production versus regenerated production. Deep Sea Res. Part I Oceanogr. Res. Pap. 43, 723-738 (1996).; Tian, R. C. & Nicolas, E. Iodine speciation in the northwestern Mediterranean Sea, method and vertical profile. Mar. Chem. 48, 151-156 (1995); http://doi.pangaea.de/10.1594/PANGAEA.174586.	Chance 2014	Tables 1, 2, and 3, Figure 2, 3, and 7
DYFAMED	1993-11-01	DYFAMED_Nov93_10	43.4167	7.86667	10	77	390	467	Tian, R. C. et al. Iodine speciation: a potential indicator to evaluate new production versus regenerated production. Deep Sea Res. Part I Oceanogr. Res. Pap. 43, 723-738 (1996).; Tian, R. C. & Nicolas, E. Iodine speciation in the northwestern Mediterranean Sea, method and vertical profile. Mar. Chem. 48, 151-156 (1995); http://doi.pangaea.de/10.1594/PANGAEA.174586.	Chance 2014	Tables 1, 2, and 3, Figure 2
DYFAMED	1993-12-01	DYFAMED_Dec93_10	43.4167	7.86667	10	73			Tian, R. C. et al. Iodine speciation: a potential indicator to evaluate new production versus regenerated production. Deep Sea Res. Part I Oceanogr. Res. Pap. 43, 723-738 (1996).; Tian, R. C. & Nicolas, E. Iodine speciation in the northwestern Mediterranean Sea, method and vertical profile. Mar. Chem. 48, 151-156 (1995); http://doi.pangaea.de/10.1594/PANGAEA.174586.	Chance 2014	Tables 1, 2, and 3, Figure 2
DYFAMED	1993-07-01	DYFAMED_July93_20	43.4167	7.86667	20	42	429	471	Tian&Nicolas, 1995; Tian et al., 1996	Chance 2014	Tables 1, 2, and 3, Figure 2
DYFAMED	1994-01-01	DYFAMED_Jan94_20	43.4167	7.86667	20	28	440	468	Tian&Nicolas, 1995; Tian et al., 1996	Chance 2014	Tables 1, 2, and 3, Figure 2
DYFAMED	1994-02-01	DYFAMED_Feb94_20	43.4167	7.86667	20	21	455	476	Tian&Nicolas, 1995; Tian et al., 1996	Chance 2014	Tables 1, 2, and 3, Figure 2, 3, and 7
DYFAMED	1994-03-01	DYFAMED_March94_20	43.4167	7.86667	20	23	445	468	Tian&Nicolas, 1995; Tian et al., 1996	Chance 2014	Tables 1, 2, and 3, Figure 2
DYFAMED	1994-04-01	DYFAMED_Apr94_20	43.4167	7.86667	20	23	457	480	Tian&Nicolas, 1995; Tian et al., 1996	Chance 2014	Tables 1, 2, and 3, Figure 2, 3, and 7
DYFAMED	1994-05-01	DYFAMED_May94_20	43.4167	7.86667	20	28	439	467	Tian&Nicolas, 1995; Tian et al., 1996	Chance 2014	Tables 1, 2, and 3, Figure 2
DYFAMED	1994-06-01	DYFAMED_Jun94_20	43.4167	7.86667	20	28	440	468	Tian&Nicolas, 1995; Tian et al., 1996	Chance 2014	Tables 1, 2, and 3, Figure 2, 3, and 7
DYFAMED	1993-09-01	DYFAMED_Sep93_20	43.4167	7.86667	20	61	407	468	Tian&Nicolas, 1995; Tian et al., 1996	Chance 2014	Tables 1, 2, and 3, Figure 2, 3, and 7
DYFAMED	1993-11-01	DYFAMED_Nov93_20	43.4167	7.86667	20	79	389	468	Tian&Nicolas, 1995; Tian et al., 1996	Chance 2014	Tables 1, 2, and 3, Figure 2
DYFAMED	1993-12-01	DYFAMED_Dec93_20	43.4167	7.86667	20	62			Tian&Nicolas, 1995; Tian et al., 1996	Chance 2014	Tables 1, 2, and 3, Figure 2
DYFAMED	1993-07-01	DYFAMED_July93_30	43.4167	7.86667	30	33	429	462	Tian&Nicolas, 1995; Tian et al., 1996	Chance 2014	Tables 1, 2, and 3, Figure 2
DYFAMED	1994-01-01	DYFAMED_Jan94_30	43.4167	7.86667	30	27	440	467	Tian&Nicolas, 1995; Tian et al., 1996	Chance 2014	Tables 1, 2, and 3, Figure 2
DYFAMED	1994-02-01	DYFAMED_Feb94_30	43.4167	7.86667	30	24	453	477	Tian&Nicolas, 1995; Tian et al., 1996	Chance 2014	Tables 1, 2, and 3, Figure 2, 3, and 7
DYFAMED	1994-03-01	DYFAMED_March94_30	43.4167	7.86667	30	21	448	469	Tian&Nicolas, 1995; Tian et al., 1996	Chance 2014	Tables 1, 2, and 3, Figure 2
DYFAMED	1994-04-01	DYFAMED_Apr94_30	43.4167	7.86667	30	22	458	480	Tian&Nicolas, 1995; Tian et al., 1996	Chance 2014	Tables 1, 2, and 3, Figure 2, 3, and 7
DYFAMED	1994-05-01	DYFAMED_May94_30	43.4167	7.86667	30	24	450	474	Tian&Nicolas, 1995; Tian et al., 1996	Chance 2014	Tables 1, 2, and 3, Figure 2
DYFAMED	1994-06-01	DYFAMED_Jun94_30	43.4167	7.86667	30	29	444	473	Tian&Nicolas, 1995; Tian et al., 1996	Chance 2014	Tables 1, 2, and 3, Figure 2, 3, and 7
DYFAMED	1993-09-01	DYFAMED_Sep93_30	43.4167	7.86667	30	51	418	469	Tian&Nicolas, 1995; Tian et al., 1996	Chance 2014	Tables 1, 2, and 3, Figure 2, 3, and 7
DYFAMED	1993-11-01	DYFAMED_Nov93_30	43.4167	7.86667	30	78	387	465	Tian&Nicolas, 1995; Tian et al., 1996	Chance 2014	Tables 1, 2, and 3, Figure 2
DYFAMED	1993-12-01	DYFAMED_Dec93_30	43.4167	7.86667	30	55			Tian&Nicolas, 1995; Tian et al., 1996	Chance 2014	Tables 1, 2, and 3, Figure 2
DYFAMED	1993-07-01	DYFAMED_July93_40	43.4167	7.86667	40	25	448	473	Tian&Nicolas, 1995; Tian et al., 1996	Chance 2014	Tables 1, 2, and 3, Figure 2
DYFAMED	1994-01-01	DYFAMED_Jan94_40	43.4167	7.86667	40	25	445	470	Tian&Nicolas, 1995; Tian et al., 1996	Chance 2014	Tables 1, 2, and 3, Figure 2
DYFAMED	1994-02-01	DYFAMED_Feb94_40	43.4167	7.86667	40	18	457	475	Tian&Nicolas, 1995; Tian et al., 1996	Chance 2014	Tables 1, 2, and 3, Figure 2, 3, and 7
DYFAMED	1994-03-01	DYFAMED_March94_40	43.4167	7.86667	40	14	455	469	Tian&Nicolas, 1995; Tian et al., 1996	Chance 2014	Tables 1, 2, and 3, Figure 2
DYFAMED	1994-04-01	DYFAMED_Apr94_40	43.4167	7.86667	40	19	467	486	Tian&Nicolas, 1995; Tian et al., 1996	Chance 2014	Tables 1, 2, and 3, Figure 2, 3, and 7
DYFAMED	1994-05-01	DYFAMED_May94_40	43.4167	7.86667	40	19	467	476	Tian&Nicolas, 1995; Tian et al., 1996	Chance 2014	Tables 1, 2, and 3, Figure 2
DYFAMED	1994-06-01	DYFAMED_Jun94_40	43.4167	7.86667	40	23	452	475	Tian&Nicolas, 1995; Tian et al., 1996	Chance 2014	Tables 1, 2, and 3, Figure 2, 3, and 7
DYFAMED	1993-09-01	DYFAMED_Sep93_40	43.4167	7.86667	40	47	430	477	Tian&Nicolas, 1995; Tian et al., 1996	Chance 2014	Tables 1, 2, and 3, Figure 2, 3, and 7
DYFAMED	1993-11-01	DYFAMED_Nov93_40	43.4167	7.86667	40	79	385	464	Tian&Nicolas, 1995; Tian et al., 1996	Chance 2014	Tables 1, 2, and 3, Figure 2
DYFAMED	1993-12-01	DYFAMED_Dec93_40	43.4167	7.86667	40	32			Tian&Nicolas, 1995; Tian et al., 1996	Chance 2014	Tables 1, 2, and 3, Figure 2
DYFAMED	1993-07-01	DYFAMED_July93_50	43.4167	7.86667	50	17	448	465	Tian&Nicolas, 1995; Tian et al., 1996	Chance 2014	Tables 1, 2, and 3, Figure 2
DYFAMED	1994-01-01	DYFAMED_Jan94_50	43.4167	7.86667	50	24	451	475	Tian&Nicolas, 1995; Tian et al., 1996	Chance 2014	Tables 1, 2, and 3, Figure 2
DYFAMED	1994-02-01	DYFAMED_Feb94_50	43.4167	7.86667	50	16	467	483	Tian&Nicolas, 1995; Tian et al., 1996	Chance 2014	Tables 1, 2, and 3, Figure 2, 3, and 7
DYFAMED	1994-03-01	DYFAMED_March94_50	43.4167	7.86667	50	16	455	471	Tian&Nicolas, 1995; Tian et al., 1996	Chance 2014	Tables 1, 2, and 3, Figure 2
DYFAMED	1994-04-01	DYFAMED_Apr94_50	43.4167	7.86667	50	14	466	480	Tian&Nicolas, 1995; Tian et al., 1996	Chance 2014	Tables 1, 2, and 3, Figure 2, 3, and 7
DYFAMED	1994-05-01	DYFAMED_May94_50	43.4167	7.86667	50	17	466	483	Tian&Nicolas, 1995; Tian et al., 1996	Chance 2014	Tables 1, 2, and 3, Figure 2
DYFAMED	1994-06-01	DYFAMED_Jun94_50	43.4167	7.86667	50	10	470	480	Tian&Nicolas, 1995; Tian et al., 1996	Chance 2014	Tables 1, 2, and 3, Figure 2, 3, and 7
DYFAMED	1993-09-01	DYFAMED_Sep93_50	43.4167	7.86667	50	43	440	483	Tian&Nicolas, 1995; Tian et al., 1996	Chance 2014	Tables 1, 2, and 3, Figure 2, 3, and 7
DYFAMED	1993-11-01	DYFAMED_Nov93_50	43.4167	7.86667	50	53	413	466	Tian&Nicolas, 1995; Tian et al., 1996	Chance 2014	Tables 1, 2, and 3, Figure 2
DYFAMED	1993-12-01	DYFAMED_Dec93_50	43.4167	7.86667	50	19			Tian&Nicolas, 1995; Tian et al., 1996	Chance 2014	Tables 1, 2, and 3, Figure 2
DYFAMED	1993-07-01	DYFAMED_July93_70	43.4167	7.86667	70	10	456	466	Tian&Nicolas, 1995; Tian et al., 1996	Chance 2014	Tables 1, 2, and 3, Figure 2
DYFAMED	1994-01-01	DYFAMED_Jan94_70	43.4167	7.86667	70	17	461	478	Tian&Nicolas, 1995; Tian et al., 1996	Chance 2014	Tables 1, 2, and 3, Figure 2
DYFAMED	1994-02-01	DYFAMED_Feb94_70	43.4167	7.86667	70	11	463	474	Tian&Nicolas, 1995; Tian et al., 1996	Chance 2014	Tables 1, 2, and 3, Figure 2, 3, and 7
DYFAMED	1994-03-01	DYFAMED_March94_70	43.4167	7.86667	70	7	470	477	Tian&Nicolas, 1995; Tian et al., 1996	Chance 2014	Tables 1, 2, and 3, Figure 2
DYFAMED	1994-04-01	DYFAMED_Apr94_70	43.4167	7.86667	70	8	473	481	Tian&Nicolas, 1995; Tian et al., 1996	Chance 2014	Tables 1, 2, and 3, Figure 2, 3, and 7
DYFAMED	1994-05-01	DYFAMED_May94_70	43.4167	7.86667	70	8	471	479	Tian&Nicolas, 1995; Tian et al., 1996	Chance 2014	Tables 1, 2, and 3, Figure 2
DYFAMED	1994-06-01	DYFAMED_Jun94_70	43.4167	7.86667	70	5	473	478	Tian&Nicolas, 1995; Tian et al., 1996	Chance 2014	Tables 1, 2, and 3, Figure 2, 3, and 7
DYFAMED	1993-09-01	DYFAMED_Sep93_70	43.4167	7.86667	70	21	457	478	Tian&Nicolas, 1995; Tian et al., 1996	Chance 2014	Tables 1, 2, and 3, Figure 2, 3, and 7
DYFAMED	1993-11-01	DYFAMED_Nov93_70	43.4167	7.86667	70	35	436	471	Tian&Nicolas, 1995; Tian et al., 1996	Chance 2014	Tables 1, 2, and 3, Figure 2
DYFAMED	1993-12-01	DYFAMED_Dec93_70	43.4167	7.86667	70	13			Tian&Nicolas, 1995; Tian et al., 1996	Chance 2014	Tables 1, 2, and 3, Figure 2
DYFAMED	1993-07-01	DYFAMED_July93_90	43.4167	7.86667	90	6	467	473	Tian&Nicolas, 1995; Tian et al., 1996	Chance 2014	Tables 1, 2, and 3, Figure 2
DYFAMED	1994-01-01	DYFAMED_Jan94_90	43.4167	7.86667	90	4	480	484	Tian&Nicolas, 1995; Tian et al., 1996	Chance 2014	Tables 1, 2, and 3, Figure 2
DYFAMED	1994-02-01	DYFAMED_Feb94_90	43.4167	7.86667	90	8	470	478	Tian&Nicolas, 1995; Tian et al., 1996	Chance 2014	Tables 1, 2, and 3, Figure 2, 3, and 7
DYFAMED	1994-03-01	DYFAMED_March94_90	43.4167	7.86667	90	0	476	476	Tian&Nicolas, 1995; Tian et al., 1996	Chance 2014	Tables 1, 2, and 3, Figure 2
DYFAMED	1994-04-01	DYFAMED_Apr94_90	43.4167	7.86667	90	13	461	474	Tian&Nicolas, 1995; Tian et al., 1996	Chance 2014	Tables 1, 2, and 3, Figure 2, 3, and 7
DYFAMED	1994-05-01	DYFAMED_May94_90	43.4167	7.86667	90	5	469	474	Tian&Nicolas, 1995; Tian et al., 1996	Chance 2014	Tables 1, 2, and 3, Figure 2
DYFAMED	1994-06-01	DYFAMED_Jun94_90	43.4167	7.86667	90	0	479	479	Tian&Nicolas, 1995; Tian et al., 1996	Chance 2014	Tables 1, 2, and 3, Figure 2, 3, and 7
DYFAMED	1993-09-01	DYFAMED_Sep93_90	43.4167	7.86667	90	15	462	477	Tian&Nicolas, 1995; Tian et al., 1996	Chance 2014	Tables 1, 2, and 3, Figure 2, 3, and 7
DYFAMED	1993-11-01	DYFAMED_Nov93_90	43.4167	7.86667	90	16	458	474	Tian&Nicolas, 1995; Tian et al., 1996	Chance 2014	Tables 1, 2, and 3, Figure 2
DYFAMED	1993-12-01	DYFAMED_Dec93_90	43.4167	7.86667	90	8			Tian&Nicolas, 1995; Tian et al., 1996	Chance 2014	Tables 1, 2, and 3, Figure 2
DYFAMED	1993-07-01	DYFAMED_July93_110	43.4167	7.86667	110	5	469	474	Tian&Nicolas, 1995; Tian et al., 1996	Chance 2014	Tables 1, 2, and 3, Figure 2
DYFAMED	1994-01-01	DYFAMED_Jan94_110	43.4167	7.86667	110	4	479	483	Tian&Nicolas, 1995; Tian et al., 1996	Chance 2014	Tables 1, 2, and 3, Figure 2
DYFAMED	1994-02-01	DYFAMED_Feb94_110	43.4167	7.86667	110	0	474	474	Tian&Nicolas, 1995; Tian et al., 1996	Chance 2014	Tables 1, 2, and 3, Figure 2, 3, and 7
DYFAMED	1994-03-01	DYFAMED_March94_110	43.4167	7.86667	110	0	477	477	Tian&Nicolas, 1995; Tian et al., 1996	Chance 2014	Tables 1, 2, and 3, Figure 2
DYFAMED	1994-04-01	DYFAMED_Apr94_110	43.4167	7.86667	110	6	468	474	Tian&Nicolas, 1995; Tian et al., 1996	Chance 2014	Tables 1, 2, and 3, Figure 2, 3, and 7
DYFAMED	1994-05-01	DYFAMED_May94_110	43.4167	7.86667	110	4	474	478	Tian&Nicolas, 1995; Tian et al., 1996	Chance 2014	Tables 1, 2, and 3, Figure 2
DYFAMED	1994-06-01	DYFAMED_Jun94_110	43.4167	7.86667	110	0	477	477	Tian&Nicolas, 1995; Tian et al., 1996	Chance 2014	Tables 1, 2, and 3, Figure 2, 3, and 7
DYFAMED	1993-09-01	DYFAMED_Sep93_110	43.4167	7.86667	110	8	471	479	Tian&Nicolas, 1995; Tian et al., 1996	Chance 2014	Tables 1, 2, and 3, Figure 2, 3, and 7
DYFAMED	1993-11-01	DYFAMED_Nov93_110	43.4167	7.86667	110	12	460	472	Tian&Nicolas, 1995; Tian et al., 1996	Chance 2014	Tables 1, 2, and 3, Figure 2
DYFAMED	1993-12-01	DYFAMED_Dec93_110	43.4167	7.86667	110	5			Tian&Nicolas, 1995; Tian et al., 1996	Chance 2014	Tables 1, 2, and 3, Figure 2
DYFAMED	1993-07-01	DYFAMED_July93_150	43.4167	7.86667	150	3	474	477	Tian&Nicolas, 1995; Tian et al., 1996	Chance 2014	Tables 1, 2, and 3, Figure 2
DYFAMED	1994-01-01	DYFAMED_Jan94_150	43.4167	7.86667	150	0	478	478	Tian&Nicolas, 1995; Tian et al., 1996	Chance 2014	Tables 1, 2, and 3, Figure 2
DYFAMED	1994-02-01	DYFAMED_Feb94_150	43.4167	7.86667	150	7	465	472	Tian&Nicolas, 1995; Tian et al., 1996	Chance 2014	Tables 1, 2, and 3, Figure 2, 3, and 7
DYFAMED	1994-03-01	DYFAMED_March94_150	43.4167	7.86667	150	0	479	479	Tian&Nicolas, 1995; Tian et al., 1996	Chance 2014	Tables 1, 2, and 3, Figure 2
DYFAMED	1994-04-01	DYFAMED_Apr94_150	43.4167	7.86667	150	0	478	478	Tian&Nicolas, 1995; Tian et al., 1996	Chance 2014	Tables 1, 2, and 3, Figure 2, 3, and 7
DYFAMED	1994-05-01	DYFAMED_May94_150	43.4167	7.86667	150	5	471	476	Tian&Nicolas, 1995; Tian et al., 1996	Chance 2014	Tables 1, 2, and 3, Figure 2
DYFAMED	1994-06-01	DYFAMED_Jun94_150	43.4167	7.86667	150	0	477	477	Tian&Nicolas, 1995; Tian et al., 1996	Chance 2014	Tables 1, 2, and 3, Figure 2, 3, and 7
DYFAMED	1993-09-01	DYFAMED_Sep93_150	43.4167	7.86667	150	6	472	478	Tian&Nicolas, 1995; Tian et al., 1996	Chance 2014	Tables 1, 2, and 3, Figure 2, 3, and 7
DYFAMED	1993-11-01	DYFAMED_Nov93_150	43.4167	7.86667	150	8	476	484	Tian&Nicolas, 1995; Tian et al., 1996	Chance 2014	Tables 1, 2, and 3, Figure 2
DYFAMED	1993-12-01	DYFAMED_Dec93_150	43.4167	7.86667	150	4			Tian&Nicolas, 1995; Tian et al., 1996	Chance 2014	Tables 1, 2, and 3, Figure 2
DYFAMED	1993-07-01	DYFAMED_July93_200	43.4167	7.86667	200	4	481	485	Tian&Nicolas, 1995; Tian et al., 1996	Chance 2014	Tables 1, 2, and 3, Figure 2
DYFAMED	1994-01-01	DYFAMED_Jan94_200	43.4167	7.86667	200	3	480	483	Tian&Nicolas, 1995; Tian et al., 1996	Chance 2014	Tables 1, 2, and 3, Figure 2
DYFAMED	1994-02-01	DYFAMED_Feb94_200	43.4167	7.86667	200	6	467	473	Tian&Nicolas, 1995; Tian et al., 1996	Chance 2014	Tables 1, 2, and 3, Figure 2, 3, and 7
DYFAMED	1994-03-01	DYFAMED_March94_200	43.4167	7.86667	200	0	474	474	Tian&Nicolas, 1995; Tian et al., 1996	Chance 2014	Tables 1, 2, and 3, Figure 2
DYFAMED	1994-04-01	DYFAMED_Apr94_200	43.4167	7.86667	200	4	475	479	Tian&Nicolas, 1995; Tian et al., 1996	Chance 2014	Tables 1, 2, and 3, Figure 2, 3, and 7
DYFAMED	1994-05-01	DYFAMED_May94_200	43.4167	7.86667	200	3	470	473	Tian&Nicolas, 1995; Tian et al., 1996	Chance 2014	Tables 1, 2, and 3, Figure 2
DYFAMED	1994-06-01	DYFAMED_Jun94_200	43.4167	7.86667	200	0	482	482	Tian&Nicolas, 1995; Tian et al., 1996	Chance 2014	Tables 1, 2, and 3, Figure 2, 3, and 7
DYFAMED	1993-09-01	DYFAMED_Sep93_200	43.4167	7.86667	200	5	479	484	Tian&Nicolas, 1995; Tian et al., 1996	Chance 2014	Tables 1, 2, and 3, Figure 2, 3, and 7
DYFAMED	1993-11-01	DYFAMED_Nov93_200	43.4167	7.86667	200	4	486	490	Tian&Nicolas, 1995; Tian et al., 1996	Chance 2014	Tables 1, 2, and 3, Figure 2
DYFAMED	1993-12-01	DYFAMED_Dec93_200	43.4167	7.86667	200	0			Tian&Nicolas, 1995; Tian et al., 1996	Chance 2014	Tables 1, 2, and 3, Figure 2
DYFAMED	1993-07-01	DYFAMED_July93_500	43.4167	7.86667	500	0	478	478	Tian&Nicolas, 1995; Tian et al., 1996	Chance 2014	Tables 1, 2, and 3, Figure 2
DYFAMED	1994-01-01	DYFAMED_Jan94_500	43.4167	7.86667	500	0	479	479	Tian&Nicolas, 1995; Tian et al., 1996	Chance 2014	Tables 1, 2, and 3, Figure 2
DYFAMED	1994-02-01	DYFAMED_Feb94_500	43.4167	7.86667	500	0	484	484	Tian&Nicolas, 1995; Tian et al., 1996	Chance 2014	Tables 1, 2, and 3, Figure 2, 3, and 7
DYFAMED	1994-03-01	DYFAMED_March94_500	43.4167	7.86667	500	0	478	478	Tian&Nicolas, 1995; Tian et al., 1996	Chance 2014	Tables 1, 2, and 3, Figure 2
DYFAMED	1994-04-01	DYFAMED_Apr94_500	43.4167	7.86667	500	0	483	483	Tian&Nicolas, 1995; Tian et al., 1996	Chance 2014	Tables 1, 2, and 3, Figure 2, 3, and 7
DYFAMED	1994-05-01	DYFAMED_May94_500	43.4167	7.86667	500	0	489	489	Tian&Nicolas, 1995; Tian et al., 1996	Chance 2014	Tables 1, 2, and 3, Figure 2
DYFAMED	1994-06-01	DYFAMED_Jun94_500	43.4167	7.86667	500	0	476	476	Tian&Nicolas, 1995; Tian et al., 1996	Chance 2014	Tables 1, 2, and 3, Figure 2, 3, and 7
DYFAMED	1993-09-01	DYFAMED_Sep93_500	43.4167	7.86667	500	3	472	475	Tian&Nicolas, 1995; Tian et al., 1996	Chance 2014	Tables 1, 2, and 3, Figure 2, 3, and 7
DYFAMED	1993-11-01	DYFAMED_Nov93_500	43.4167	7.86667	500	2	483	485	Tian&Nicolas, 1995; Tian et al., 1996	Chance 2014	Tables 1, 2, and 3, Figure 2
DYFAMED	1993-12-01	DYFAMED_Dec93_500	43.4167	7.86667	500	10			Tian&Nicolas, 1995; Tian et al., 1996	Chance 2014	Tables 1, 2, and 3, Figure 2
DYFAMED	1993-07-01	DYFAMED_July93_1000	43.4167	7.86667	1000	0	478	478	Tian&Nicolas, 1995; Tian et al., 1996	Chance 2014	Tables 1, 2, and 3
DYFAMED	1994-01-01	DYFAMED_Jan94_1000	43.4167	7.86667	1000	0	482	482	Tian&Nicolas, 1995; Tian et al., 1996	Chance 2014	Tables 1, 2, and 3
DYFAMED	1994-02-01	DYFAMED_Feb94_1000	43.4167	7.86667	1000	0	482	482	Tian&Nicolas, 1995; Tian et al., 1996	Chance 2014	Tables 1, 2, and 3
DYFAMED	1994-03-01	DYFAMED_March94_1000	43.4167	7.86667	1000	0	475	475	Tian&Nicolas, 1995; Tian et al., 1996	Chance 2014	Tables 1, 2, and 3
DYFAMED	1994-04-01	DYFAMED_Apr94_1000	43.4167	7.86667	1000	7	480	487	Tian&Nicolas, 1995; Tian et al., 1996	Chance 2014	Tables 1, 2, and 3
DYFAMED	1994-05-01	DYFAMED_May94_1000	43.4167	7.86667	1000	0	483	483	Tian&Nicolas, 1995; Tian et al., 1996	Chance 2014	Tables 1, 2, and 3
DYFAMED	1994-06-01	DYFAMED_Jun94_1000	43.4167	7.86667	1000	0	478	478	Tian&Nicolas, 1995; Tian et al., 1996	Chance 2014	Tables 1, 2, and 3
DYFAMED	1993-09-01	DYFAMED_Sep93_1000	43.4167	7.86667	1000	0	480	480	Tian&Nicolas, 1995; Tian et al., 1996	Chance 2014	Tables 1, 2, and 3
DYFAMED	1993-11-01	DYFAMED_Nov93_1000	43.4167	7.86667	1000	3	479	482	Tian&Nicolas, 1995; Tian et al., 1996	Chance 2014	Tables 1, 2, and 3
DYFAMED	1993-12-01	DYFAMED_Dec93_1000	43.4167	7.86667	1000	13			Tian&Nicolas, 1995; Tian et al., 1996	Chance 2014	Tables 1, 2, and 3
DYFAMED	1993-07-01	DYFAMED_July93_1500	43.4167	7.86667	1500	6	469	475	Tian&Nicolas, 1995; Tian et al., 1996	Chance 2014	Tables 1, 2, and 3
DYFAMED	1994-01-01	DYFAMED_Jan94_1500	43.4167	7.86667	1500	0	477	477	Tian&Nicolas, 1995; Tian et al., 1996	Chance 2014	Tables 1, 2, and 3
DYFAMED	1994-02-01	DYFAMED_Feb94_1500	43.4167	7.86667	1500	0	487	487	Tian&Nicolas, 1995; Tian et al., 1996	Chance 2014	Tables 1, 2, and 3
DYFAMED	1994-03-01	DYFAMED_March94_1500	43.4167	7.86667	1500	0	474	474	Tian&Nicolas, 1995; Tian et al., 1996	Chance 2014	Tables 1, 2, and 3
DYFAMED	1994-04-01	DYFAMED_Apr94_1500	43.4167	7.86667	1500	0	482	482	Tian&Nicolas, 1995; Tian et al., 1996	Chance 2014	Tables 1, 2, and 3
DYFAMED	1994-05-01	DYFAMED_May94_1500	43.4167	7.86667	1500	0	490	490	Tian&Nicolas, 1995; Tian et al., 1996	Chance 2014	Tables 1, 2, and 3
DYFAMED	1994-06-01	DYFAMED_Jun94_1500	43.4167	7.86667	1500	0	480	480	Tian&Nicolas, 1995; Tian et al., 1996	Chance 2014	Tables 1, 2, and 3
DYFAMED	1993-09-01	DYFAMED_Sep93_1500	43.4167	7.86667	1500	5	473	478	Tian&Nicolas, 1995; Tian et al., 1996	Chance 2014	Tables 1, 2, and 3
DYFAMED	1993-11-01	DYFAMED_Nov93_1500	43.4167	7.86667	1500	4	480	484	Tian&Nicolas, 1995; Tian et al., 1996	Chance 2014	Tables 1, 2, and 3
DYFAMED	1993-12-01	DYFAMED_Dec93_1500	43.4167	7.86667	1500	3			Tian&Nicolas, 1995; Tian et al., 1996	Chance 2014	Tables 1, 2, and 3
DYFAMED	1994-01-01	DYFAMED_Jan94_2000	43.4167	7.86667	2000	3	480	483	Tian&Nicolas, 1995; Tian et al., 1996	Chance 2014	Tables 1, 2, and 3
DYFAMED	1994-02-01	DYFAMED_Feb94_2000	43.4167	7.86667	2000	0	488	488	Tian&Nicolas, 1995; Tian et al., 1996	Chance 2014	Tables 1, 2, and 3
DYFAMED	1994-03-01	DYFAMED_March94_2000	43.4167	7.86667	2000	0	477	477	Tian&Nicolas, 1995; Tian et al., 1996	Chance 2014	Tables 1, 2, and 3
DYFAMED	1994-04-01	DYFAMED_Apr94_2000	43.4167	7.86667	2000	0	485	485	Tian&Nicolas, 1995; Tian et al., 1996	Chance 2014	Tables 1, 2, and 3
DYFAMED	1994-05-01	DYFAMED_May94_2000	43.4167	7.86667	2000	0	478	478	Tian&Nicolas, 1995; Tian et al., 1996	Chance 2014	Tables 1, 2, and 3
DYFAMED	1994-06-01	DYFAMED_Jun94_2000	43.4167	7.86667	2000	0	479	479	Tian&Nicolas, 1995; Tian et al., 1996	Chance 2014	Tables 1, 2, and 3
DYFAMED	1993-09-01	DYFAMED_Sep93_2000	43.4167	7.86667	2000	3	481	484	Tian&Nicolas, 1995; Tian et al., 1996	Chance 2014	Tables 1, 2, and 3
DYFAMED	1993-11-01	DYFAMED_Nov93_2000	43.4167	7.86667	2000	0	482	482	Tian&Nicolas, 1995; Tian et al., 1996	Chance 2014	Tables 1, 2, and 3
DYFAMED	1993-12-01	DYFAMED_Dec93_2000	43.4167	7.86667	2000	6			Tian&Nicolas, 1995; Tian et al., 1996	Chance 2014	Tables 1, 2, and 3
DYFAMED	1993-07-01		43.417	7.867	2000	0			Tian and Nicholas 1995, Tian et al. 1996		Tables 1, 2, and 3
DYFAMED	1994-01-01		43.417	7.867	50	27			Tian and Nicholas 1995, Tian et al. 1996		Figure 6
DYFAMED	1994-02-01		43.417	7.867	50	21			Tian and Nicholas 1995, Tian et al. 1996		Figure 6
DYFAMED	1994-03-01		43.417	7.867	50	21			Tian and Nicholas 1995, Tian et al. 1996		Figure 6
DYFAMED	1994-04-01		43.417	7.867	50	22			Tian and Nicholas 1995, Tian et al. 1996		Figure 6
DYFAMED	1994-05-01		43.417	7.867	50	26			Tian and Nicholas 1995, Tian et al. 1996		Figure 6
DYFAMED	1994-06-01		43.417	7.867	50	30			Tian and Nicholas 1995, Tian et al. 1996		Figure 6
DYFAMED	1993-07-01		43.417	7.867	50	38			Tian and Nicholas 1995, Tian et al. 1996		Figure 6
DYFAMED	1993-09-01		43.417	7.867	50	55			Tian and Nicholas 1995, Tian et al. 1996		Figure 6
DYFAMED	1993-11-01		43.417	7.867	50	78			Tian and Nicholas 1995, Tian et al. 1996		Figure 6
DYFAMED	1993-12-01		43.417	7.867	50	53			Tian and Nicholas 1995, Tian et al. 1996		Figure 6
TRUE78	Indian1	TRUE78_Indian1_2	-5	41	2		283.465		Truesdale, 1978.	Chance 2014	Table 1
TRUE78	Indian2	TRUE78_Indian2_2	-2	43	2		283.465		Truesdale, 1978.	Chance 2014	Table 1
TRUE78	trAt1	TRUE78_trAt1_2	18	-25	2	157.48	307.087	464.567	Truesdale, V. W. Iodine in inshore and off-shore marine waters. Mar. Chem. 6, 1-13 (1978).	Chance 2014	Table 1
TRUE78	trAt2	TRUE78_trAt2_2	11	-20	2	157.48	307.087	464.567	Truesdale, V. W. Iodine in inshore and off-shore marine waters. Mar. Chem. 6, 1-13 (1978).	Chance 2014	Table 1
TRUE78	trAt3	TRUE78_trAt3_2	30	-24	2	15.748	440.945	456.693	Truesdale, V. W. Iodine in inshore and off-shore marine waters. Mar. Chem. 6, 1-13 (1978).	Chance 2014	Table 1
TRUE78	NEAt	TRUE78_NEAt_2	57	-10	2	23.622	425.197	448.819	Truesdale, V. W. Iodine in inshore and off-shore marine waters. Mar. Chem. 6, 1-13 (1978).	Chance 2014	Table 1
TRUE78	Irish	TRUE78_Irish_2	54	-5	2	94.4882	307.087	401.575	Truesdale, V. W. Iodine in inshore and off-shore marine waters. Mar. Chem. 6, 1-13 (1978).	Chance 2014	Table 1
TRUE78	CaeBay	TRUE78_CaeBay_2	53.05	-4.17	2	108.924	296.588	405.512	Truesdale, V. W. Iodine in inshore and off-shore marine waters. Mar. Chem. 6, 1-13 (1978).	Chance 2014	Table 1
Bermuda Inshore	1A 1	Bermuda Inshore_1A 1_1	32.35	-64.7333	1	150	310	460	Jickells, T. D., Boyd, S. S. & Knap, A. H. Iodine cycling in the Sargasso Sea and the Bermuda inshore waters. Mar. Chem. 24, 61-82 (1988).	Chance 2014	Data from Tim
Bermuda Inshore	1A 10	Bermuda Inshore_1A 10_1	32.35	-64.7333	1	220	280	500	Jickells, T. D., Boyd, S. S. & Knap, A. H. Iodine cycling in the Sargasso Sea and the Bermuda inshore waters. Mar. Chem. 24, 61-82 (1988).	Chance 2014	Data from Tim
Bermuda Inshore	1A 11	Bermuda Inshore_1A 11_1	32.35	-64.7333	1	150	290	440	Jickells, T. D., Boyd, S. S. & Knap, A. H. Iodine cycling in the Sargasso Sea and the Bermuda inshore waters. Mar. Chem. 24, 61-82 (1988).	Chance 2014	Data from Tim
Bermuda Inshore	1A 12	Bermuda Inshore_1A 12_1	32.35	-64.7333	1	240	260	500	Jickells, T. D., Boyd, S. S. & Knap, A. H. Iodine cycling in the Sargasso Sea and the Bermuda inshore waters. Mar. Chem. 24, 61-82 (1988).	Chance 2014	Data from Tim
Bermuda Inshore	1A 13	Bermuda Inshore_1A 13_1	32.35	-64.7333	1	220	320	540	Jickells, T. D., Boyd, S. S. & Knap, A. H. Iodine cycling in the Sargasso Sea and the Bermuda inshore waters. Mar. Chem. 24, 61-82 (1988).	Chance 2014	Data from Tim
Bermuda Inshore	1A 2	Bermuda Inshore_1A 2_1	32.35	-64.7333	1			450	Jickells et al., 1988	Chance 2014	Data from Tim
Bermuda Inshore	1A 3	Bermuda Inshore_1A 3_1	32.35	-64.7333	1				Jickells et al., 1988	Chance 2014	Data from Tim
Bermuda Inshore	1A 4	Bermuda Inshore_1A 4_1	32.35	-64.7333	1	90	350	440	Jickells, T. D., Boyd, S. S. & Knap, A. H. Iodine cycling in the Sargasso Sea and the Bermuda inshore waters. Mar. Chem. 24, 61-82 (1988).	Chance 2014	Data from Tim
Bermuda Inshore	1A 5	Bermuda Inshore_1A 5_1	32.35	-64.7333	1	110	360	470	Jickells, T. D., Boyd, S. S. & Knap, A. H. Iodine cycling in the Sargasso Sea and the Bermuda inshore waters. Mar. Chem. 24, 61-82 (1988).	Chance 2014	Data from Tim
Bermuda Inshore	1A 6	Bermuda Inshore_1A 6_1	32.35	-64.7333	1	80	380	460	Jickells, T. D., Boyd, S. S. & Knap, A. H. Iodine cycling in the Sargasso Sea and the Bermuda inshore waters. Mar. Chem. 24, 61-82 (1988).	Chance 2014	Data from Tim
Bermuda Inshore	1A 7	Bermuda Inshore_1A 7_1	32.35	-64.7333	1	130	330	460	Jickells, T. D., Boyd, S. S. & Knap, A. H. Iodine cycling in the Sargasso Sea and the Bermuda inshore waters. Mar. Chem. 24, 61-82 (1988).	Chance 2014	Data from Tim
Bermuda Inshore	1A 8	Bermuda Inshore_1A 8_1	32.35	-64.7333	1	180	300	480	Jickells, T. D., Boyd, S. S. & Knap, A. H. Iodine cycling in the Sargasso Sea and the Bermuda inshore waters. Mar. Chem. 24, 61-82 (1988).	Chance 2014	Data from Tim
Bermuda Inshore	1A 9	Bermuda Inshore_1A 9_1	32.35	-64.7333	1	120	330	450	Jickells, T. D., Boyd, S. S. & Knap, A. H. Iodine cycling in the Sargasso Sea and the Bermuda inshore waters. Mar. Chem. 24, 61-82 (1988).	Chance 2014	Data from Tim
Bermuda Inshore	2A 1	Bermuda Inshore_2A 1_1	32.4167	-64.7333	1	90	350	440	Jickells, T. D., Boyd, S. S. & Knap, A. H. Iodine cycling in the Sargasso Sea and the Bermuda inshore waters. Mar. Chem. 24, 61-82 (1988).	Chance 2014	Data from Tim
Bermuda Inshore	2A 10	Bermuda Inshore_2A 10_1	32.4167	-64.7333	1	180	320	500	Jickells, T. D., Boyd, S. S. & Knap, A. H. Iodine cycling in the Sargasso Sea and the Bermuda inshore waters. Mar. Chem. 24, 61-82 (1988).	Chance 2014	Data from Tim
Bermuda Inshore	2A 11	Bermuda Inshore_2A 11_1	32.4167	-64.7333	1	120	320	440	Jickells, T. D., Boyd, S. S. & Knap, A. H. Iodine cycling in the Sargasso Sea and the Bermuda inshore waters. Mar. Chem. 24, 61-82 (1988).	Chance 2014	Data from Tim
Bermuda Inshore	2A 12	Bermuda Inshore_2A 12_1	32.4167	-64.7333	1	160	340	500	Jickells, T. D., Boyd, S. S. & Knap, A. H. Iodine cycling in the Sargasso Sea and the Bermuda inshore waters. Mar. Chem. 24, 61-82 (1988).	Chance 2014	Data from Tim
Bermuda Inshore	2A 13	Bermuda Inshore_2A 13_1	32.4167	-64.7333	1	220	320	540	Jickells, T. D., Boyd, S. S. & Knap, A. H. Iodine cycling in the Sargasso Sea and the Bermuda inshore waters. Mar. Chem. 24, 61-82 (1988).	Chance 2014	Data from Tim
Bermuda Inshore	2A 2	Bermuda Inshore_2A 2_1	32.4167	-64.7333	1	190	270	460	Jickells, T. D., Boyd, S. S. & Knap, A. H. Iodine cycling in the Sargasso Sea and the Bermuda inshore waters. Mar. Chem. 24, 61-82 (1988).	Chance 2014	Data from Tim
Bermuda Inshore	2A 3	Bermuda Inshore_2A 3_1	32.4167	-64.7333	1		260		Jickells et al., 1988	Chance 2014	Data from Tim
Bermuda Inshore	2A 4	Bermuda Inshore_2A 4_1	32.4167	-64.7333	1	130	330	460	Jickells, T. D., Boyd, S. S. & Knap, A. H. Iodine cycling in the Sargasso Sea and the Bermuda inshore waters. Mar. Chem. 24, 61-82 (1988).	Chance 2014	Data from Tim
Bermuda Inshore	2A 5	Bermuda Inshore_2A 5_1	32.4167	-64.7333	1	80	370	450	Jickells, T. D., Boyd, S. S. & Knap, A. H. Iodine cycling in the Sargasso Sea and the Bermuda inshore waters. Mar. Chem. 24, 61-82 (1988).	Chance 2014	Data from Tim
Bermuda Inshore	2A 6	Bermuda Inshore_2A 6_1	32.4167	-64.7333	1	50	420	470	Jickells, T. D., Boyd, S. S. & Knap, A. H. Iodine cycling in the Sargasso Sea and the Bermuda inshore waters. Mar. Chem. 24, 61-82 (1988).	Chance 2014	Data from Tim
Bermuda Inshore	2A 7	Bermuda Inshore_2A 7_1	32.4167	-64.7333	1	100	370	470	Jickells, T. D., Boyd, S. S. & Knap, A. H. Iodine cycling in the Sargasso Sea and the Bermuda inshore waters. Mar. Chem. 24, 61-82 (1988).	Chance 2014	Data from Tim
Bermuda Inshore	2A 8	Bermuda Inshore_2A 8_1	32.4167	-64.7333	1	160	330	490	Jickells, T. D., Boyd, S. S. & Knap, A. H. Iodine cycling in the Sargasso Sea and the Bermuda inshore waters. Mar. Chem. 24, 61-82 (1988).	Chance 2014	Data from Tim
Bermuda Inshore	2A 9	Bermuda Inshore_2A 9_1	32.4167	-64.7333	1	130	360	490	Jickells, T. D., Boyd, S. S. & Knap, A. H. Iodine cycling in the Sargasso Sea and the Bermuda inshore waters. Mar. Chem. 24, 61-82 (1988).	Chance 2014	Data from Tim
Bermuda Inshore	CH 1	Bermuda Inshore_CH 1_1	32.35	-64.7833	1	150	310	460	Jickells, T. D., Boyd, S. S. & Knap, A. H. Iodine cycling in the Sargasso Sea and the Bermuda inshore waters. Mar. Chem. 24, 61-82 (1988).	Chance 2014	Data from Tim
Bermuda Inshore	CH 10	Bermuda Inshore_CH 10_1	32.35	-64.7833	1	170	320	490	Jickells, T. D., Boyd, S. S. & Knap, A. H. Iodine cycling in the Sargasso Sea and the Bermuda inshore waters. Mar. Chem. 24, 61-82 (1988).	Chance 2014	Data from Tim
Bermuda Inshore	CH 11	Bermuda Inshore_CH 11_1	32.35	-64.7833	1	160	280	440	Jickells, T. D., Boyd, S. S. & Knap, A. H. Iodine cycling in the Sargasso Sea and the Bermuda inshore waters. Mar. Chem. 24, 61-82 (1988).	Chance 2014	Data from Tim
Bermuda Inshore	CH 12	Bermuda Inshore_CH 12_1	32.35	-64.7833	1	240	260	500	Jickells, T. D., Boyd, S. S. & Knap, A. H. Iodine cycling in the Sargasso Sea and the Bermuda inshore waters. Mar. Chem. 24, 61-82 (1988).	Chance 2014	Data from Tim
Bermuda Inshore	CH 13	Bermuda Inshore_CH 13_1	32.35	-64.7833	1	180	330	510	Jickells, T. D., Boyd, S. S. & Knap, A. H. Iodine cycling in the Sargasso Sea and the Bermuda inshore waters. Mar. Chem. 24, 61-82 (1988).	Chance 2014	Data from Tim
Bermuda Inshore	CH 2	Bermuda Inshore_CH 2_1	32.35	-64.7833	1	200	270	470	Jickells, T. D., Boyd, S. S. & Knap, A. H. Iodine cycling in the Sargasso Sea and the Bermuda inshore waters. Mar. Chem. 24, 61-82 (1988).	Chance 2014	Data from Tim
Bermuda Inshore	CH 3	Bermuda Inshore_CH 3_1	32.35	-64.7833	1		130	450	Jickells et al., 1988	Chance 2014	Data from Tim
Bermuda Inshore	CH 4	Bermuda Inshore_CH 4_1	32.35	-64.7833	1	130	320	450	Jickells, T. D., Boyd, S. S. & Knap, A. H. Iodine cycling in the Sargasso Sea and the Bermuda inshore waters. Mar. Chem. 24, 61-82 (1988).	Chance 2014	Data from Tim
Bermuda Inshore	CH 5	Bermuda Inshore_CH 5_1	32.35	-64.7833	1	100	360	460	Jickells, T. D., Boyd, S. S. & Knap, A. H. Iodine cycling in the Sargasso Sea and the Bermuda inshore waters. Mar. Chem. 24, 61-82 (1988).	Chance 2014	Data from Tim
Bermuda Inshore	CH 6	Bermuda Inshore_CH 6_1	32.35	-64.7833	1	90	380	470	Jickells, T. D., Boyd, S. S. & Knap, A. H. Iodine cycling in the Sargasso Sea and the Bermuda inshore waters. Mar. Chem. 24, 61-82 (1988).	Chance 2014	Data from Tim
Bermuda Inshore	CH 7	Bermuda Inshore_CH 7_1	32.35	-64.7833	1	130	330	460	Jickells, T. D., Boyd, S. S. & Knap, A. H. Iodine cycling in the Sargasso Sea and the Bermuda inshore waters. Mar. Chem. 24, 61-82 (1988).	Chance 2014	Data from Tim
Bermuda Inshore	CH 8	Bermuda Inshore_CH 8_1	32.35	-64.7833	1	160	330	490	Jickells, T. D., Boyd, S. S. & Knap, A. H. Iodine cycling in the Sargasso Sea and the Bermuda inshore waters. Mar. Chem. 24, 61-82 (1988).	Chance 2014	Data from Tim
Bermuda Inshore	CH 9	Bermuda Inshore_CH 9_1	32.35	-64.7833	1	160	350	510	Jickells, T. D., Boyd, S. S. & Knap, A. H. Iodine cycling in the Sargasso Sea and the Bermuda inshore waters. Mar. Chem. 24, 61-82 (1988).	Chance 2014	Data from Tim
Bermuda Inshore	GS 1	Bermuda Inshore_GS 1_1	32.2667	-64.8667	1	260	200	460	Jickells, T. D., Boyd, S. S. & Knap, A. H. Iodine cycling in the Sargasso Sea and the Bermuda inshore waters. Mar. Chem. 24, 61-82 (1988).	Chance 2014	Data from Tim
Bermuda Inshore	GS 10	Bermuda Inshore_GS 10_1	32.2667	-64.8667	1	290	230	520	Jickells, T. D., Boyd, S. S. & Knap, A. H. Iodine cycling in the Sargasso Sea and the Bermuda inshore waters. Mar. Chem. 24, 61-82 (1988).	Chance 2014	Data from Tim
Bermuda Inshore	GS 11	Bermuda Inshore_GS 11_1	32.2667	-64.8667	1	200	250	450	Jickells, T. D., Boyd, S. S. & Knap, A. H. Iodine cycling in the Sargasso Sea and the Bermuda inshore waters. Mar. Chem. 24, 61-82 (1988).	Chance 2014	Data from Tim
Bermuda Inshore	GS 12	Bermuda Inshore_GS 12_1	32.2667	-64.8667	1	250	250	500	Jickells, T. D., Boyd, S. S. & Knap, A. H. Iodine cycling in the Sargasso Sea and the Bermuda inshore waters. Mar. Chem. 24, 61-82 (1988).	Chance 2014	Data from Tim
Bermuda Inshore	GS 13	Bermuda Inshore_GS 13_1	32.2667	-64.8667	1	260	250	510	Jickells, T. D., Boyd, S. S. & Knap, A. H. Iodine cycling in the Sargasso Sea and the Bermuda inshore waters. Mar. Chem. 24, 61-82 (1988).	Chance 2014	Data from Tim
Bermuda Inshore	GS 2	Bermuda Inshore_GS 2_1	32.2667	-64.8667	1	180	260	440	Jickells, T. D., Boyd, S. S. & Knap, A. H. Iodine cycling in the Sargasso Sea and the Bermuda inshore waters. Mar. Chem. 24, 61-82 (1988).	Chance 2014	Data from Tim
Bermuda Inshore	GS 3	Bermuda Inshore_GS 3_1	32.2667	-64.8667	1			480	Jickells et al., 1988	Chance 2014	Data from Tim
Bermuda Inshore	GS 4	Bermuda Inshore_GS 4_1	32.2667	-64.8667	1			440	Jickells et al., 1988	Chance 2014	Data from Tim
Bermuda Inshore	GS 5	Bermuda Inshore_GS 5_1	32.2667	-64.8667	1	110	320	430	Jickells, T. D., Boyd, S. S. & Knap, A. H. Iodine cycling in the Sargasso Sea and the Bermuda inshore waters. Mar. Chem. 24, 61-82 (1988).	Chance 2014	Data from Tim
Bermuda Inshore	GS 6	Bermuda Inshore_GS 6_1	32.2667	-64.8667	1	120	340	460	Jickells, T. D., Boyd, S. S. & Knap, A. H. Iodine cycling in the Sargasso Sea and the Bermuda inshore waters. Mar. Chem. 24, 61-82 (1988).	Chance 2014	Data from Tim
Bermuda Inshore	GS 7	Bermuda Inshore_GS 7_1	32.2667	-64.8667	1	150	310	460	Jickells, T. D., Boyd, S. S. & Knap, A. H. Iodine cycling in the Sargasso Sea and the Bermuda inshore waters. Mar. Chem. 24, 61-82 (1988).	Chance 2014	Data from Tim
Bermuda Inshore	GS 8	Bermuda Inshore_GS 8_1	32.2667	-64.8667	1	230	270	500	Jickells, T. D., Boyd, S. S. & Knap, A. H. Iodine cycling in the Sargasso Sea and the Bermuda inshore waters. Mar. Chem. 24, 61-82 (1988).	Chance 2014	Data from Tim
Bermuda Inshore	GS 9	Bermuda Inshore_GS 9_1	32.2667	-64.8667	1	200	320	520	Jickells, T. D., Boyd, S. S. & Knap, A. H. Iodine cycling in the Sargasso Sea and the Bermuda inshore waters. Mar. Chem. 24, 61-82 (1988).	Chance 2014	Data from Tim
Bermuda Inshore	HH1	Bermuda Inshore_HH1_1	32.2667	-64.7917	1	250	180	430	Jickells, T. D., Boyd, S. S. & Knap, A. H. Iodine cycling in the Sargasso Sea and the Bermuda inshore waters. Mar. Chem. 24, 61-82 (1988).	Chance 2014	Data from Tim
Bermuda Inshore	HH10	Bermuda Inshore_HH10_1	32.2667	-64.7917	1	300	210	510	Jickells, T. D., Boyd, S. S. & Knap, A. H. Iodine cycling in the Sargasso Sea and the Bermuda inshore waters. Mar. Chem. 24, 61-82 (1988).	Chance 2014	Data from Tim
Bermuda Inshore	HH11	Bermuda Inshore_HH11_1	32.2667	-64.7917	1	230	230	460	Jickells, T. D., Boyd, S. S. & Knap, A. H. Iodine cycling in the Sargasso Sea and the Bermuda inshore waters. Mar. Chem. 24, 61-82 (1988).	Chance 2014	Data from Tim
Bermuda Inshore	HH12	Bermuda Inshore_HH12_1	32.2667	-64.7917	1	280	230	510	Jickells, T. D., Boyd, S. S. & Knap, A. H. Iodine cycling in the Sargasso Sea and the Bermuda inshore waters. Mar. Chem. 24, 61-82 (1988).	Chance 2014	Data from Tim
Bermuda Inshore	HH13	Bermuda Inshore_HH13_1	32.2667	-64.7917	1	280	240	520	Jickells, T. D., Boyd, S. S. & Knap, A. H. Iodine cycling in the Sargasso Sea and the Bermuda inshore waters. Mar. Chem. 24, 61-82 (1988).	Chance 2014	Data from Tim
Bermuda Inshore	HH2	Bermuda Inshore_HH2_1	32.2667	-64.7917	1	170	260	430	Jickells, T. D., Boyd, S. S. & Knap, A. H. Iodine cycling in the Sargasso Sea and the Bermuda inshore waters. Mar. Chem. 24, 61-82 (1988).	Chance 2014	Data from Tim
Bermuda Inshore	HH3	Bermuda Inshore_HH3_1	32.2667	-64.7917	1	220	260	480	Jickells, T. D., Boyd, S. S. & Knap, A. H. Iodine cycling in the Sargasso Sea and the Bermuda inshore waters. Mar. Chem. 24, 61-82 (1988).	Chance 2014	Data from Tim
Bermuda Inshore	HH4	Bermuda Inshore_HH4_1	32.2667	-64.7917	1	170	250	420	Jickells, T. D., Boyd, S. S. & Knap, A. H. Iodine cycling in the Sargasso Sea and the Bermuda inshore waters. Mar. Chem. 24, 61-82 (1988).	Chance 2014	Data from Tim
Bermuda Inshore	HH5	Bermuda Inshore_HH5_1	32.2667	-64.7917	1	100	330	430	Jickells, T. D., Boyd, S. S. & Knap, A. H. Iodine cycling in the Sargasso Sea and the Bermuda inshore waters. Mar. Chem. 24, 61-82 (1988).	Chance 2014	Data from Tim
Bermuda Inshore	HH6	Bermuda Inshore_HH6_1	32.2667	-64.7917	1	120	310	430	Jickells, T. D., Boyd, S. S. & Knap, A. H. Iodine cycling in the Sargasso Sea and the Bermuda inshore waters. Mar. Chem. 24, 61-82 (1988).	Chance 2014	Data from Tim
Bermuda Inshore	HH7	Bermuda Inshore_HH7_1	32.2667	-64.7917	1	200	270	470	Jickells, T. D., Boyd, S. S. & Knap, A. H. Iodine cycling in the Sargasso Sea and the Bermuda inshore waters. Mar. Chem. 24, 61-82 (1988).	Chance 2014	Data from Tim
Bermuda Inshore	HH8	Bermuda Inshore_HH8_1	32.2667	-64.7917	1	220	250	470	Jickells, T. D., Boyd, S. S. & Knap, A. H. Iodine cycling in the Sargasso Sea and the Bermuda inshore waters. Mar. Chem. 24, 61-82 (1988).	Chance 2014	Data from Tim
Bermuda Inshore	HH9	Bermuda Inshore_HH9_1	32.2667	-64.7917	1	220	230	450	Jickells, T. D., Boyd, S. S. & Knap, A. H. Iodine cycling in the Sargasso Sea and the Bermuda inshore waters. Mar. Chem. 24, 61-82 (1988).	Chance 2014	Data from Tim
Bermuda Inshore	HS 1	Bermuda Inshore_HS 1_1	32.3167	-64.7333	1	270	190	460	Jickells, T. D., Boyd, S. S. & Knap, A. H. Iodine cycling in the Sargasso Sea and the Bermuda inshore waters. Mar. Chem. 24, 61-82 (1988).	Chance 2014	Data from Tim
Bermuda Inshore	HS 10	Bermuda Inshore_HS 10_1	32.3167	-64.7333	1	280	230	510	Jickells, T. D., Boyd, S. S. & Knap, A. H. Iodine cycling in the Sargasso Sea and the Bermuda inshore waters. Mar. Chem. 24, 61-82 (1988).	Chance 2014	Data from Tim
Bermuda Inshore	HS 11	Bermuda Inshore_HS 11_1	32.3167	-64.7333	1	240	220	460	Jickells, T. D., Boyd, S. S. & Knap, A. H. Iodine cycling in the Sargasso Sea and the Bermuda inshore waters. Mar. Chem. 24, 61-82 (1988).	Chance 2014	Data from Tim
Bermuda Inshore	HS 12	Bermuda Inshore_HS 12_1	32.3167	-64.7333	1	290	220	510	Jickells, T. D., Boyd, S. S. & Knap, A. H. Iodine cycling in the Sargasso Sea and the Bermuda inshore waters. Mar. Chem. 24, 61-82 (1988).	Chance 2014	Data from Tim
Bermuda Inshore	HS 13	Bermuda Inshore_HS 13_1	32.3167	-64.7333	1	270	250	520	Jickells, T. D., Boyd, S. S. & Knap, A. H. Iodine cycling in the Sargasso Sea and the Bermuda inshore waters. Mar. Chem. 24, 61-82 (1988).	Chance 2014	Data from Tim
Bermuda Inshore	HS 2	Bermuda Inshore_HS 2_1	32.3167	-64.7333	1	240	220	460	Jickells, T. D., Boyd, S. S. & Knap, A. H. Iodine cycling in the Sargasso Sea and the Bermuda inshore waters. Mar. Chem. 24, 61-82 (1988).	Chance 2014	Data from Tim
Bermuda Inshore	HS 3	Bermuda Inshore_HS 3_1	32.3167	-64.7333	1	220	260	480	Jickells, T. D., Boyd, S. S. & Knap, A. H. Iodine cycling in the Sargasso Sea and the Bermuda inshore waters. Mar. Chem. 24, 61-82 (1988).	Chance 2014	Data from Tim
Bermuda Inshore	HS 4	Bermuda Inshore_HS 4_1	32.3167	-64.7333	1	160	250	410	Jickells, T. D., Boyd, S. S. & Knap, A. H. Iodine cycling in the Sargasso Sea and the Bermuda inshore waters. Mar. Chem. 24, 61-82 (1988).	Chance 2014	Data from Tim
Bermuda Inshore	HS 5	Bermuda Inshore_HS 5_1	32.3167	-64.7333	1	110	300	410	Jickells, T. D., Boyd, S. S. & Knap, A. H. Iodine cycling in the Sargasso Sea and the Bermuda inshore waters. Mar. Chem. 24, 61-82 (1988).	Chance 2014	Data from Tim
Bermuda Inshore	HS 6	Bermuda Inshore_HS 6_1	32.3167	-64.7333	1	120	320	440	Jickells, T. D., Boyd, S. S. & Knap, A. H. Iodine cycling in the Sargasso Sea and the Bermuda inshore waters. Mar. Chem. 24, 61-82 (1988).	Chance 2014	Data from Tim
Bermuda Inshore	HS 7	Bermuda Inshore_HS 7_1	32.3167	-64.7333	1	150	280	430	Jickells, T. D., Boyd, S. S. & Knap, A. H. Iodine cycling in the Sargasso Sea and the Bermuda inshore waters. Mar. Chem. 24, 61-82 (1988).	Chance 2014	Data from Tim
Bermuda Inshore	HS 8	Bermuda Inshore_HS 8_1	32.3167	-64.7333	1	210	260	470	Jickells, T. D., Boyd, S. S. & Knap, A. H. Iodine cycling in the Sargasso Sea and the Bermuda inshore waters. Mar. Chem. 24, 61-82 (1988).	Chance 2014	Data from Tim
Bermuda Inshore	HS 9	Bermuda Inshore_HS 9_1	32.3167	-64.7333	1	170	290	460	Jickells, T. D., Boyd, S. S. & Knap, A. H. Iodine cycling in the Sargasso Sea and the Bermuda inshore waters. Mar. Chem. 24, 61-82 (1988).	Chance 2014	Data from Tim
Bermuda Inshore	IHH 1	Inner Hamilton Harbour	32.2917	-64.7667	1	270	190	460	Jickells, T. D., Boyd, S. S. & Knap, A. H. Iodine cycling in the Sargasso Sea and the Bermuda inshore waters. Mar. Chem. 24, 61-82 (1988).	Chance 2014	Data from Tim
Bermuda Inshore	IHH 10	Bermuda Inshore_IHH 10_1	32.2917	-64.7667	1	330	200	530	Jickells, T. D., Boyd, S. S. & Knap, A. H. Iodine cycling in the Sargasso Sea and the Bermuda inshore waters. Mar. Chem. 24, 61-82 (1988).	Chance 2014	Data from Tim
Bermuda Inshore	IHH 11	Bermuda Inshore_IHH 11_1	32.2917	-64.7667	1	220	240	460	Jickells, T. D., Boyd, S. S. & Knap, A. H. Iodine cycling in the Sargasso Sea and the Bermuda inshore waters. Mar. Chem. 24, 61-82 (1988).	Chance 2014	Data from Tim
Bermuda Inshore	IHH 12	Bermuda Inshore_IHH 12_1	32.2917	-64.7667	1	350	160	510	Jickells, T. D., Boyd, S. S. & Knap, A. H. Iodine cycling in the Sargasso Sea and the Bermuda inshore waters. Mar. Chem. 24, 61-82 (1988).	Chance 2014	Data from Tim
Bermuda Inshore	IHH 13	Bermuda Inshore_IHH 13_1	32.2917	-64.7667	1	260	240	500	Jickells, T. D., Boyd, S. S. & Knap, A. H. Iodine cycling in the Sargasso Sea and the Bermuda inshore waters. Mar. Chem. 24, 61-82 (1988).	Chance 2014	Data from Tim
Bermuda Inshore	IHH 2	Bermuda Inshore_IHH 2_1	32.2917	-64.7667	1	360	90	450	Jickells, T. D., Boyd, S. S. & Knap, A. H. Iodine cycling in the Sargasso Sea and the Bermuda inshore waters. Mar. Chem. 24, 61-82 (1988).	Chance 2014	Data from Tim
Bermuda Inshore	IHH 3	Bermuda Inshore_IHH 3_1	32.2917	-64.7667	1	260	250	510	Jickells, T. D., Boyd, S. S. & Knap, A. H. Iodine cycling in the Sargasso Sea and the Bermuda inshore waters. Mar. Chem. 24, 61-82 (1988).	Chance 2014	Data from Tim
Bermuda Inshore	IHH 4	Bermuda Inshore_IHH 4_1	32.2917	-64.7667	1	170	250	420	Jickells, T. D., Boyd, S. S. & Knap, A. H. Iodine cycling in the Sargasso Sea and the Bermuda inshore waters. Mar. Chem. 24, 61-82 (1988).	Chance 2014	Data from Tim
Bermuda Inshore	IHH 5	Bermuda Inshore_IHH 5_1	32.2917	-64.7667	1	330	100	430	Jickells, T. D., Boyd, S. S. & Knap, A. H. Iodine cycling in the Sargasso Sea and the Bermuda inshore waters. Mar. Chem. 24, 61-82 (1988).	Chance 2014	Data from Tim
Bermuda Inshore	IHH 6	Bermuda Inshore_IHH 6_1	32.2917	-64.7667	1	340	110	450	Jickells, T. D., Boyd, S. S. & Knap, A. H. Iodine cycling in the Sargasso Sea and the Bermuda inshore waters. Mar. Chem. 24, 61-82 (1988).	Chance 2014	Data from Tim
Bermuda Inshore	IHH 7	Bermuda Inshore_IHH 7_1	32.2917	-64.7667	1	170	280	450	Jickells, T. D., Boyd, S. S. & Knap, A. H. Iodine cycling in the Sargasso Sea and the Bermuda inshore waters. Mar. Chem. 24, 61-82 (1988).	Chance 2014	Data from Tim
Bermuda Inshore	IHH 8	Bermuda Inshore_IHH 8_1	32.2917	-64.7667	1	210	270	480	Jickells, T. D., Boyd, S. S. & Knap, A. H. Iodine cycling in the Sargasso Sea and the Bermuda inshore waters. Mar. Chem. 24, 61-82 (1988).	Chance 2014	Data from Tim
Bermuda Inshore	IHH 9	Bermuda Inshore_IHH 9_1	32.2917	-64.7667	1	140	290	430	Jickells, T. D., Boyd, S. S. & Knap, A. H. Iodine cycling in the Sargasso Sea and the Bermuda inshore waters. Mar. Chem. 24, 61-82 (1988).	Chance 2014	Data from Tim
weatherbird1	S	weatherbird1_S_1	32.1667	-64.5	1	160	290	450	Jickells, T. D., Boyd, S. S. & Knap, A. H. Iodine cycling in the Sargasso Sea and the Bermuda inshore waters. Mar. Chem. 24, 61-82 (1988).	Chance 2014	Data from Tim
weatherbird2	S	weatherbird2_S_1	32.1667	-64.5	1	120	320	440	Jickells, T. D., Boyd, S. S. & Knap, A. H. Iodine cycling in the Sargasso Sea and the Bermuda inshore waters. Mar. Chem. 24, 61-82 (1988).	Chance 2014	Data from Tim
weatherbird3	S	weatherbird3_S_1	32.1667	-64.5	1	120	340	460	Jickells, T. D., Boyd, S. S. & Knap, A. H. Iodine cycling in the Sargasso Sea and the Bermuda inshore waters. Mar. Chem. 24, 61-82 (1988).	Chance 2014	Data from Tim
weatherbird4	S	weatherbird4_S_1	32.1667	-64.5	1	160	300	460	Jickells, T. D., Boyd, S. S. & Knap, A. H. Iodine cycling in the Sargasso Sea and the Bermuda inshore waters. Mar. Chem. 24, 61-82 (1988).	Chance 2014	Data from Tim
weatherbird5	S	weatherbird5_S_1	32.1667	-64.5	1	100	380	480	Jickells, T. D., Boyd, S. S. & Knap, A. H. Iodine cycling in the Sargasso Sea and the Bermuda inshore waters. Mar. Chem. 24, 61-82 (1988).	Chance 2014	Data from Tim
weatherbird6	S	weatherbird6_S_1	32.1667	-64.5	1	110	370	480	Jickells, T. D., Boyd, S. S. & Knap, A. H. Iodine cycling in the Sargasso Sea and the Bermuda inshore waters. Mar. Chem. 24, 61-82 (1988).	Chance 2014	Data from Tim
weatherbird7	S	weatherbird7_S_1	32.1667	-64.5	1	150	350	500	Jickells, T. D., Boyd, S. S. & Knap, A. H. Iodine cycling in the Sargasso Sea and the Bermuda inshore waters. Mar. Chem. 24, 61-82 (1988).	Chance 2014	Data from Tim
weatherbird8	S	weatherbird8_S_1	32.1667	-64.5	1	160	380	540	Jickells, T. D., Boyd, S. S. & Knap, A. H. Iodine cycling in the Sargasso Sea and the Bermuda inshore waters. Mar. Chem. 24, 61-82 (1988).	Chance 2014	Data from Tim
weatherbird9	S	weatherbird9_S_1	32.1667	-64.5	1	95	365	460	Jickells, T. D., Boyd, S. S. & Knap, A. H. Iodine cycling in the Sargasso Sea and the Bermuda inshore waters. Mar. Chem. 24, 61-82 (1988).	Chance 2014	Data from Tim
weatherbird10	S	weatherbird10_S_1	32.1667	-64.5	1	160	310	470	Jickells, T. D., Boyd, S. S. & Knap, A. H. Iodine cycling in the Sargasso Sea and the Bermuda inshore waters. Mar. Chem. 24, 61-82 (1988).	Chance 2014	Data from Tim
weatherbird11	S	weatherbird11_S_1	32.1667	-64.5	1	150	300	450	Jickells, T. D., Boyd, S. S. & Knap, A. H. Iodine cycling in the Sargasso Sea and the Bermuda inshore waters. Mar. Chem. 24, 61-82 (1988).	Chance 2014	Data from Tim
weatherbird12	S	weatherbird12_S_1	32.1667	-64.5	1	150	320	470	Jickells, T. D., Boyd, S. S. & Knap, A. H. Iodine cycling in the Sargasso Sea and the Bermuda inshore waters. Mar. Chem. 24, 61-82 (1988).	Chance 2014	Data from Tim
weatherbird13	S	weatherbird13_S_1	32.1667	-64.5	1	160	310	470	Jickells, T. D., Boyd, S. S. & Knap, A. H. Iodine cycling in the Sargasso Sea and the Bermuda inshore waters. Mar. Chem. 24, 61-82 (1988).	Chance 2014	Data from Tim
weatherbird1	S	weatherbird1_S_10	32.1667	-64.5	10	210	300	510	Jickells, T. D., Boyd, S. S. & Knap, A. H. Iodine cycling in the Sargasso Sea and the Bermuda inshore waters. Mar. Chem. 24, 61-82 (1988).	Chance 2014	Data from Tim
weatherbird1	S	weatherbird1_S_50	32.1667	-64.5	50	200	300	500	Jickells et al., 1988	Chance 2014	Data from Tim
weatherbird2	S	weatherbird2_S_50	32.1667	-64.5	50	160	310	470	Jickells et al., 1988	Chance 2014	Data from Tim
weatherbird3	S	weatherbird3_S_50	32.1667	-64.5	50	120	360	480	Jickells et al., 1988	Chance 2014	Data from Tim
weatherbird4	S	weatherbird4_S_50	32.1667	-64.5	50	140	300	440	Jickells et al., 1988	Chance 2014	Data from Tim
weatherbird5	S	weatherbird5_S_50	32.1667	-64.5	50	95	375	470	Jickells et al., 1988	Chance 2014	Data from Tim
weatherbird6	S	weatherbird6_S_50	32.1667	-64.5	50	100	370	470	Jickells et al., 1988	Chance 2014	Data from Tim
weatherbird7	S	weatherbird7_S_50	32.1667	-64.5	50	120	350	470	Jickells et al., 1988	Chance 2014	Data from Tim
weatherbird8	S	weatherbird8_S_50	32.1667	-64.5	50	150	390	540	Jickells et al., 1988	Chance 2014	Data from Tim
weatherbird9	S	weatherbird9_S_50	32.1667	-64.5	50	100	360	460	Jickells et al., 1988	Chance 2014	Data from Tim
weatherbird10	S	weatherbird10_S_50	32.1667	-64.5	50	100	340	440	Jickells et al., 1988	Chance 2014	Data from Tim
weatherbird11	S	weatherbird11_S_50	32.1667	-64.5	50	120	320	440	Jickells et al., 1988	Chance 2014	Data from Tim
weatherbird12	S	weatherbird12_S_50	32.1667	-64.5	50	140	340	480	Jickells et al., 1988	Chance 2014	Data from Tim
weatherbird13	S	weatherbird13_S_50	32.1667	-64.5	50	160	300	460	Jickells et al., 1988	Chance 2014	Data from Tim
weatherbird1	S	weatherbird1_S_75	32.1667	-64.5	75		320		Jickells et al., 1988	Chance 2014	Data from Tim
weatherbird2	S	weatherbird2_S_100	32.1667	-64.5	100		330		Jickells et al., 1988	Chance 2014	Data from Tim
weatherbird3	S	weatherbird3_S_100	32.1667	-64.5	100	150	350	500	Jickells et al., 1988	Chance 2014	Data from Tim
weatherbird4	S	weatherbird4_S_100	32.1667	-64.5	100	110	320	430	Jickells et al., 1988	Chance 2014	Data from Tim
weatherbird5	S	weatherbird5_S_100	32.1667	-64.5	100	80	380	460	Jickells et al., 1988	Chance 2014	Data from Tim
weatherbird6	S	weatherbird6_S_100	32.1667	-64.5	100	120	350	470	Jickells et al., 1988	Chance 2014	Data from Tim
weatherbird7	S	weatherbird7_S_100	32.1667	-64.5	100	100	380	480	Jickells et al., 1988	Chance 2014	Data from Tim
weatherbird8	S	weatherbird8_S_100	32.1667	-64.5	100	150	380	530	Jickells et al., 1988	Chance 2014	Data from Tim
weatherbird9	S	weatherbird9_S_100	32.1667	-64.5	100		370		Jickells et al., 1988	Chance 2014	Data from Tim
weatherbird10	S	weatherbird10_S_100	32.1667	-64.5	100	150	320	470	Jickells et al., 1988	Chance 2014	Data from Tim
weatherbird11	S	weatherbird11_S_100	32.1667	-64.5	100	100	340	440	Jickells et al., 1988	Chance 2014	Data from Tim
weatherbird12	S	weatherbird12_S_100	32.1667	-64.5	100	120	360	480	Jickells et al., 1988	Chance 2014	Data from Tim
weatherbird13	S	weatherbird13_S_100	32.1667	-64.5	100	110	360	470	Jickells et al., 1988	Chance 2014	Data from Tim
weatherbird1	S	weatherbird1_S_150	32.1667	-64.5	150	60	400	460	Jickells et al., 1988	Chance 2014	Data from Tim
weatherbird2	S	weatherbird2_S_150	32.1667	-64.5	150	170	380	550	Jickells et al., 1988	Chance 2014	Data from Tim
weatherbird3	S	weatherbird3_S_150	32.1667	-64.5	150	130	360	490	Jickells et al., 1988	Chance 2014	Data from Tim
weatherbird4	S	weatherbird4_S_150	32.1667	-64.5	150	115	320	435	Jickells et al., 1988	Chance 2014	Data from Tim
weatherbird5	S	weatherbird5_S_150	32.1667	-64.5	150	90	380	470	Jickells et al., 1988	Chance 2014	Data from Tim
weatherbird6	S	weatherbird6_S_150	32.1667	-64.5	150	100	380	480	Jickells et al., 1988	Chance 2014	Data from Tim
weatherbird7	S	weatherbird7_S_150	32.1667	-64.5	150	100	380	480	Jickells et al., 1988	Chance 2014	Data from Tim
weatherbird9	S	weatherbird9_S_150	32.1667	-64.5	150	90	370	460	Jickells et al., 1988	Chance 2014	Data from Tim
weatherbird10	S	weatherbird10_S_150	32.1667	-64.5	150	30	370	400	Jickells et al., 1988	Chance 2014	Data from Tim
weatherbird11	S	weatherbird11_S_150	32.1667	-64.5	150	90	360	450	Jickells et al., 1988	Chance 2014	Data from Tim
weatherbird12	S	weatherbird12_S_150	32.1667	-64.5	150	110	390	500	Jickells et al., 1988	Chance 2014	Data from Tim
weatherbird13	S	weatherbird13_S_150	32.1667	-64.5	150	140	390	530	Jickells et al., 1988	Chance 2014	Data from Tim
weatherbird1	S	weatherbird1_S_200	32.1667	-64.5	200	120	400	520	Jickells et al., 1988	Chance 2014	Data from Tim
weatherbird2	S	weatherbird2_S_200	32.1667	-64.5	200	170	410	580	Jickells et al., 1988	Chance 2014	Data from Tim
weatherbird3	S	weatherbird3_S_200	32.1667	-64.5	200	190	420	610	Jickells et al., 1988	Chance 2014	Data from Tim
weatherbird4	S	weatherbird4_S_200	32.1667	-64.5	200	50	380	430	Jickells et al., 1988	Chance 2014	Data from Tim
weatherbird5	S	weatherbird5_S_200	32.1667	-64.5	200	110	400	510	Jickells et al., 1988	Chance 2014	Data from Tim
weatherbird6	S	weatherbird6_S_200	32.1667	-64.5	200	130	380	510	Jickells et al., 1988	Chance 2014	Data from Tim
weatherbird7	S	weatherbird7_S_200	32.1667	-64.5	200	100	400	500	Jickells et al., 1988	Chance 2014	Data from Tim
weatherbird9	S	weatherbird9_S_200	32.1667	-64.5	200	100	400	500	Jickells et al., 1988	Chance 2014	Data from Tim
weatherbird10	S	weatherbird10_S_200	32.1667	-64.5	200	70	380	450	Jickells et al., 1988	Chance 2014	Data from Tim
weatherbird11	S	weatherbird11_S_200	32.1667	-64.5	200	60	380	440	Jickells et al., 1988	Chance 2014	Data from Tim
weatherbird12	S	weatherbird12_S_200	32.1667	-64.5	200	100	400	500	Jickells et al., 1988	Chance 2014	Data from Tim
weatherbird13	S	weatherbird13_S_200	32.1667	-64.5	200	80	410	490	Jickells et al., 1988	Chance 2014	Data from Tim
Bermuda Inshore	StG 1	Bermuda Inshore_StG 1_1	32.375	-64.7667	1	150	310	460	Jickells, T. D., Boyd, S. S. & Knap, A. H. Iodine cycling in the Sargasso Sea and the Bermuda inshore waters. Mar. Chem. 24, 61-82 (1988).	Chance 2014	Data from Tim
Bermuda Inshore	StG 10	Bermuda Inshore_StG 10_1	32.375	-64.7667	1	210	280	490	Jickells, T. D., Boyd, S. S. & Knap, A. H. Iodine cycling in the Sargasso Sea and the Bermuda inshore waters. Mar. Chem. 24, 61-82 (1988).	Chance 2014	Data from Tim
Bermuda Inshore	StG 11	Bermuda Inshore_StG 11_1	32.375	-64.7667	1	170	280	450	Jickells, T. D., Boyd, S. S. & Knap, A. H. Iodine cycling in the Sargasso Sea and the Bermuda inshore waters. Mar. Chem. 24, 61-82 (1988).	Chance 2014	Data from Tim
Bermuda Inshore	StG 12	Bermuda Inshore_StG 12_1	32.375	-64.7667	1	210	300	510	Jickells, T. D., Boyd, S. S. & Knap, A. H. Iodine cycling in the Sargasso Sea and the Bermuda inshore waters. Mar. Chem. 24, 61-82 (1988).	Chance 2014	Data from Tim
Bermuda Inshore	StG 13	Bermuda Inshore_StG 13_1	32.375	-64.7667	1		300		Jickells et al., 1988	Chance 2014	Data from Tim
Bermuda Inshore	StG 2	Bermuda Inshore_StG 2_1	32.375	-64.7667	1		180	470	Jickells et al., 1988	Chance 2014	Data from Tim
Bermuda Inshore	StG 3	Bermuda Inshore_StG 3_1	32.375	-64.7667	1	90	310	400	Jickells, T. D., Boyd, S. S. & Knap, A. H. Iodine cycling in the Sargasso Sea and the Bermuda inshore waters. Mar. Chem. 24, 61-82 (1988).	Chance 2014	Data from Tim
Bermuda Inshore	StG 4	Bermuda Inshore_StG 4_1	32.375	-64.7667	1	150	320	470	Jickells, T. D., Boyd, S. S. & Knap, A. H. Iodine cycling in the Sargasso Sea and the Bermuda inshore waters. Mar. Chem. 24, 61-82 (1988).	Chance 2014	Data from Tim
Bermuda Inshore	StG 5	Bermuda Inshore_StG 5_1	32.375	-64.7667	1	80	350	430	Jickells, T. D., Boyd, S. S. & Knap, A. H. Iodine cycling in the Sargasso Sea and the Bermuda inshore waters. Mar. Chem. 24, 61-82 (1988).	Chance 2014	Data from Tim
Bermuda Inshore	StG 6	Bermuda Inshore_StG 6_1	32.375	-64.7667	1	70	360	430	Jickells, T. D., Boyd, S. S. & Knap, A. H. Iodine cycling in the Sargasso Sea and the Bermuda inshore waters. Mar. Chem. 24, 61-82 (1988).	Chance 2014	Data from Tim
Bermuda Inshore	StG 7	Bermuda Inshore_StG 7_1	32.375	-64.7667	1	140	320	460	Jickells, T. D., Boyd, S. S. & Knap, A. H. Iodine cycling in the Sargasso Sea and the Bermuda inshore waters. Mar. Chem. 24, 61-82 (1988).	Chance 2014	Data from Tim
Bermuda Inshore	StG 8	Bermuda Inshore_StG 8_1	32.375	-64.7667	1	170	320	490	Jickells, T. D., Boyd, S. S. & Knap, A. H. Iodine cycling in the Sargasso Sea and the Bermuda inshore waters. Mar. Chem. 24, 61-82 (1988).	Chance 2014	Data from Tim
Bermuda Inshore	StG 9	Bermuda Inshore_StG 9_1	32.375	-64.7667	1	160	350	510	Jickells, T. D., Boyd, S. S. & Knap, A. H. Iodine cycling in the Sargasso Sea and the Bermuda inshore waters. Mar. Chem. 24, 61-82 (1988).	Chance 2014	Data from Tim
	S		32.1667	-64.5	0		329.965	475.55	Jickells et al. 1988		Figure 2
	S		32.1667	-64.5	45		345.316	487.071	Jickells et al. 1988		Figure 2
	S		32.1667	-64.5	100		351.798	475.848	Jickells et al. 1988		Figure 2
	S		32.1667	-64.5	150		370.955	487.402	Jickells et al. 1988		Figure 2
	S		32.1667	-64.5	200		407.817	500.205	Jickells et al. 1988		Figure 2
	S		32.1667	-64.5	250		390.264	470.003	Jickells et al. 1988		Figure 2
	S		32.1667	-64.5	250		406.72		Jickells et al. 1988		Figure 2
	S		32.1667	-64.5	275		396.714	497.94	Jickells et al. 1988		Figure 2
	S		32.1667	-64.5	300		411.929	472.68	Jickells et al. 1988		Figure 2
	S		32.1667	-64.5	300		433.464		Jickells et al. 1988		Figure 2
	S		32.1667	-64.5	335		406.986		Jickells et al. 1988		Figure 2
	S		32.1667	-64.5	350		439.962		Jickells et al. 1988		Figure 2
	S		32.1667	-64.5	375		422.305		Jickells et al. 1988		Figure 2
	S		32.1667	-64.5	400		433.746	490.716	Jickells et al. 1988		Figure 2
	S		32.1667	-64.5	475		455.523		Jickells et al. 1988		Figure 2
	S		32.1667	-64.5	500		461.94	474.583	Jickells et al. 1988		Figure 2
	S		32.1667	-64.5	600		433.125		Jickells et al. 1988		Figure 2
	S		32.1667	-64.5	700		506.841		Jickells et al. 1988		Figure 2
	S		32.1667	-64.5	900		517.612		Jickells et al. 1988		Figure 2
	S		32.1667	-64.5	1000		479.944		Jickells et al. 1988		Figure 2
	S		32.1667	-64.5	1200		484.346		Jickells et al. 1988		Figure 2
	S		32.1667	-64.5	1400		440.647		Jickells et al. 1988		Figure 2
	S		32.1667	-64.5	1600		471.632		Jickells et al. 1988		Figure 2
	S		32.1667	-64.5	1800		458.32		Jickells et al. 1988		Figure 2
	S		32.1667	-64.5	2000		453.846		Jickells et al. 1988		Figure 2
	S		32.1667	-64.5	2200		468.415		Jickells et al. 1988		Figure 2
	S		32.1667	-64.5	2400		461.384		Jickells et al. 1988		Figure 2
	S		32.1667	-64.5	2500		465		Jickells et al. 1988		Figure 2
	S		32.1667	-64.5					Jickells et al. 1988		Figure 6
	S		32.1667	-64.5					Jickells et al. 1988		Figure 6
	S		32.1667	-64.5					Jickells et al. 1988		Figure 6
	S		32.1667	-64.5					Jickells et al. 1988		Figure 6
	S		32.1667	-64.5					Jickells et al. 1988		Figure 6
	S		32.1667	-64.5					Jickells et al. 1988		Figure 6
	S		32.1667	-64.5					Jickells et al. 1988		Figure 6
	S		32.1667	-64.5					Jickells et al. 1988		Figure 6
	S		32.1667	-64.5					Jickells et al. 1988		Figure 6
	S		32.1667	-64.5					Jickells et al. 1988		Figure 6
	S		32.1667	-64.5					Jickells et al. 1988		Figure 6
	S		32.1667	-64.5					Jickells et al. 1988		Figure 6
	S		32.1667	-64.5					Jickells et al. 1988		Figure 6
	S		32.1667	-64.5					Jickells et al. 1988		Figure 6
	S		32.1667	-64.5					Jickells et al. 1988		Figure 6
	S		32.1667	-64.5					Jickells et al. 1988		Figure 6
	S		32.1667	-64.5					Jickells et al. 1988		Figure 6
	S		32.1667	-64.5					Jickells et al. 1988		Figure 6
	S		32.1667	-64.5			464.464		Jickells et al. 1988		Figure 6
GEOSECS	60	GEOSECS_60_2	-32.5167	-42	2	87	387	474	Wong, G. T. F. & Brewer, P. G. Determination and distribution of iodate in south-Atlantic waters. J. Mar. Res. 32, 25-36 (1974).	Chance 2014	Table 3
GEOSECS	60	GEOSECS_60_65	-32.5167	-42	65	82	392	474	Wong&Brewer, 1973. JMarRes, 32.	Chance 2014	Table 3
GEOSECS	60	GEOSECS_60_126	-32.5167	-42	126	26	448	474	Wong&Brewer, 1973. JMarRes, 32.	Chance 2014	Table 3
GEOSECS	60	GEOSECS_60_244	-32.5167	-42	244	26	448	474	Wong&Brewer, 1973. JMarRes, 32.	Chance 2014	Table 3
GEOSECS	60	GEOSECS_60_353	-32.5167	-42	353	26	448	474	Wong&Brewer, 1973. JMarRes, 32.	Chance 2014	Table 3
GEOSECS	60	GEOSECS_60_533	-32.5167	-42	533	16	458	474	Wong&Brewer, 1973. JMarRes, 32.	Chance 2014	Table 3
GEOSECS	60	GEOSECS_60_729	-32.5167	-42	729	0	482		Wong&Brewer, 1973. JMarRes, 32.	Chance 2014	Table 3
GEOSECS	60	GEOSECS_60_1036	-32.5167	-42	1036	0	482		Wong&Brewer, 1973. JMarRes, 32.	Chance 2014	Table 3
GEOSECS	60	GEOSECS_60_1261	-32.5167	-42	1261	0	474		Wong&Brewer, 1973. JMarRes, 32.	Chance 2014	Table 3
GEOSECS	60	GEOSECS_60_1483	-32.5167	-42	1483	0	474		Wong&Brewer, 1973. JMarRes, 32.	Chance 2014	Table 3
GEOSECS	60	GEOSECS_60_1576	-32.5167	-42	1576	0	478		Wong&Brewer, 1973. JMarRes, 32.	Chance 2014	Table 3
GEOSECS	60	GEOSECS_60_1723	-32.5167	-42	1723	16	458	474	Wong&Brewer, 1973. JMarRes, 32.	Chance 2014	Table 3
GEOSECS	60	GEOSECS_60_2270	-32.5167	-42	2270	15	459	474	Wong&Brewer, 1973. JMarRes, 32.	Chance 2014	Table 3
GEOSECS	60	GEOSECS_60_2867	-32.5167	-42	2867	16	458	474	Wong&Brewer, 1973. JMarRes, 32.	Chance 2014	Table 3
GEOSECS	60	GEOSECS_60_3212	-32.5167	-42	3212	9	465	474	Wong&Brewer, 1973. JMarRes, 32.	Chance 2014	Table 3
GEOSECS	60	GEOSECS_60_3419	-32.5167	-42	3419	0	474		Wong&Brewer, 1973. JMarRes, 32.	Chance 2014	Table 3
GEOSECS	60	GEOSECS_60_3725	-32.5167	-42	3725	3	471	474	Wong&Brewer, 1973. JMarRes, 32.	Chance 2014	Table 3
GEOSECS	60	GEOSECS_60_4016	-32.5167	-42	4016	1	473	474	Wong&Brewer, 1973. JMarRes, 32.	Chance 2014	Table 3
GEOSECS	60	GEOSECS_60_4197	-32.5167	-42	4197	0	475		Wong&Brewer, 1973. JMarRes, 32.	Chance 2014	Table 3
GEOSECS	60	GEOSECS_60_4238	-32.5167	-42	4238	0	478		Wong&Brewer, 1973. JMarRes, 32.	Chance 2014	Table 3
GEOSECS	60	GEOSECS_60_4267	-32.5167	-42	4267	0	476		Wong&Brewer, 1973. JMarRes, 32.	Chance 2014	Table 3
GEOSECS	60	GEOSECS_60_4297	-32.5167	-42	4297	0	474		Wong&Brewer, 1973. JMarRes, 32.	Chance 2014	Table 3
GEOSECS	60	GEOSECS_60_4323	-32.5167	-42	4323	0	489		Wong&Brewer, 1973. JMarRes, 32.	Chance 2014	Table 3
GEOSECS	60	GEOSECS_60_4346	-32.5167	-42	4346	0	474		Wong&Brewer, 1973. JMarRes, 32.	Chance 2014	Table 3
GEOSECS	60	GEOSECS_60_4367	-32.5167	-42	4367	0	475		Wong&Brewer, 1973. JMarRes, 32.	Chance 2014	Table 3
GEOSECS	60	GEOSECS_60_4388	-32.5167	-42	4388	0	495		Wong&Brewer, 1973. JMarRes, 32.	Chance 2014	Table 3
GEOSECS	60	GEOSECS_60_4405	-32.5167	-42	4405	0	481		Wong&Brewer, 1973. JMarRes, 32.	Chance 2014	Table 3
GEOSECS	60	GEOSECS_60_5223	-32.5167	-42	5223	0	474		Wong&Brewer, 1973. JMarRes, 32.	Chance 2014	Table 3
GEOSECS	61	GEOSECS_61_5	-36	-45	5	80	403	483	Wong, G. T. F. & Brewer, P. G. Determination and distribution of iodate in south-Atlantic waters. J. Mar. Res. 32, 25-36 (1974).	Chance 2014	Table 3
GEOSECS	61	GEOSECS_61_148	-36	-45	148	58	425	483	Wong&Brewer, 1973. JMarRes, 32.	Chance 2014	Table 3
GEOSECS	61	GEOSECS_61_268	-36	-45	268	63	420	483	Wong&Brewer, 1973. JMarRes, 32.	Chance 2014	Table 3
GEOSECS	61	GEOSECS_61_426	-36	-45	426	32	451	483	Wong&Brewer, 1973. JMarRes, 32.	Chance 2014	Table 3
GEOSECS	61	GEOSECS_61_535	-36	-45	535	61	422	483	Wong&Brewer, 1973. JMarRes, 32.	Chance 2014	Table 3
GEOSECS	61	GEOSECS_61_596	-36	-45	596	32	451	483	Wong&Brewer, 1973. JMarRes, 32.	Chance 2014	Table 3
GEOSECS	61	GEOSECS_61_692	-36	-45	692	17	466	483	Wong&Brewer, 1973. JMarRes, 32.	Chance 2014	Table 3
GEOSECS	61	GEOSECS_61_792	-36	-45	792	12	471	483	Wong&Brewer, 1973. JMarRes, 32.	Chance 2014	Table 3
GEOSECS	61	GEOSECS_61_996	-36	-45	996	0	485		Wong&Brewer, 1973. JMarRes, 32.	Chance 2014	Table 3
GEOSECS	61	GEOSECS_61_1307	-36	-45	1307	0	490		Wong&Brewer, 1973. JMarRes, 32.	Chance 2014	Table 3
GEOSECS	61	GEOSECS_61_1386	-36	-45	1386	0	498		Wong&Brewer, 1973. JMarRes, 32.	Chance 2014	Table 3
GEOSECS	61	GEOSECS_61_1868	-36	-45	1868	1	482	483	Wong&Brewer, 1973. JMarRes, 32.	Chance 2014	Table 3
GEOSECS	61	GEOSECS_61_2346	-36	-45	2346	12	471	483	Wong&Brewer, 1973. JMarRes, 32.	Chance 2014	Table 3
GEOSECS	61	GEOSECS_61_2825	-36	-45	2825	13	470	483	Wong&Brewer, 1973. JMarRes, 32.	Chance 2014	Table 3
GEOSECS	61	GEOSECS_61_3165	-36	-45	3165	0	485		Wong&Brewer, 1973. JMarRes, 32.	Chance 2014	Table 3
GEOSECS	61	GEOSECS_61_3362	-36	-45	3362	12	471	483	Wong&Brewer, 1973. JMarRes, 32.	Chance 2014	Table 3
GEOSECS	61	GEOSECS_61_3496	-36	-45	3496	5	478	483	Wong&Brewer, 1973. JMarRes, 32.	Chance 2014	Table 3
GEOSECS	61	GEOSECS_61_3728	-36	-45	3728	0	488		Wong&Brewer, 1973. JMarRes, 32.	Chance 2014	Table 3
GEOSECS	61	GEOSECS_61_4096	-36	-45	4096	8	475	483	Wong&Brewer, 1973. JMarRes, 32.	Chance 2014	Table 3
GEOSECS	61	GEOSECS_61_4296	-36	-45	4296	0	485		Wong&Brewer, 1973. JMarRes, 32.	Chance 2014	Table 3
GEOSECS	61	GEOSECS_61_4647	-36	-45	4647	0	493		Wong&Brewer, 1973. JMarRes, 32.	Chance 2014	Table 3
GEOSECS	61	GEOSECS_61_4704	-36	-45	4704	0	486		Wong&Brewer, 1973. JMarRes, 32.	Chance 2014	Table 3
GEOSECS	61	GEOSECS_61_4752	-36	-45	4752	0	487		Wong&Brewer, 1973. JMarRes, 32.	Chance 2014	Table 3
GEOSECS	61	GEOSECS_61_4804	-36	-45	4804	0	486		Wong&Brewer, 1973. JMarRes, 32.	Chance 2014	Table 3
GEOSECS	61	GEOSECS_61_4827	-36	-45	4827	1	482	483	Wong&Brewer, 1973. JMarRes, 32.	Chance 2014	Table 3
GEOSECS	61	GEOSECS_61_4844	-36	-45	4844	8	475	483	Wong&Brewer, 1973. JMarRes, 32.	Chance 2014	Table 3
GEOSECS	61	GEOSECS_61_4864	-36	-45	4864	5	478	483	Wong&Brewer, 1973. JMarRes, 32.	Chance 2014	Table 3
GEOSECS	61	GEOSECS_61_4883	-36	-45	4883	6	477	483	Wong&Brewer, 1973. JMarRes, 32.	Chance 2014	Table 3
GEOSECS	61	GEOSECS_61_4904	-36	-45	4904	8	475	483	Wong&Brewer, 1973. JMarRes, 32.	Chance 2014	Table 3
GEOSECS	61	GEOSECS_61_4924	-36	-45	4924	0	508		Wong&Brewer, 1973. JMarRes, 32.	Chance 2014	Table 3
GEOSECS	109	GEOSECS_109_2	-2	-4.55	2	174	274	448	Wong, G. T. F. & Brewer, P. G. Determination and distribution of iodate in south-Atlantic waters. J. Mar. Res. 32, 25-36 (1974).	Chance 2014	Table 3
GEOSECS	109	GEOSECS_109_32	-2	-4.55	32	167	281	448	Wong&Brewer, 1973. JMarRes, 32.	Chance 2014	Table 3
GEOSECS	109	GEOSECS_109_77	-2	-4.55	77	1	447	448	Wong&Brewer, 1973. JMarRes, 32.	Chance 2014	Table 3
GEOSECS	109	GEOSECS_109_102	-2	-4.55	102	8	440	448	Wong&Brewer, 1973. JMarRes, 32.	Chance 2014	Table 3
GEOSECS	109	GEOSECS_109_172	-2	-4.55	172	29	419	448	Wong&Brewer, 1973. JMarRes, 32.	Chance 2014	Table 3
GEOSECS	109	GEOSECS_109_242	-2	-4.55	242	0	478		Wong&Brewer, 1973. JMarRes, 32.	Chance 2014	Table 3
GEOSECS	109	GEOSECS_109_282	-2	-4.55	282	37	411	448	Wong&Brewer, 1973. JMarRes, 32.	Chance 2014	Table 3
GEOSECS	109	GEOSECS_109_352	-2	-4.55	352	12	436	448	Wong&Brewer, 1973. JMarRes, 32.	Chance 2014	Table 3
GEOSECS	109	GEOSECS_109_421	-2	-4.55	421	0	482		Wong&Brewer, 1973. JMarRes, 32.	Chance 2014	Table 3
GEOSECS	109	GEOSECS_109_484	-2	-4.55	484	0	458		Wong&Brewer, 1973. JMarRes, 32.	Chance 2014	Table 3
GEOSECS	109	GEOSECS_109_554	-2	-4.55	554	0	463		Wong&Brewer, 1973. JMarRes, 32.	Chance 2014	Table 3
GEOSECS	109	GEOSECS_109_710	-2	-4.55	710	16	432	448	Wong&Brewer, 1973. JMarRes, 32.	Chance 2014	Table 3
GEOSECS	109	GEOSECS_109_860	-2	-4.55	860	23	425	448	Wong&Brewer, 1973. JMarRes, 32.	Chance 2014	Table 3
GEOSECS	109	GEOSECS_109_1003	-2	-4.55	1003	26	422	448	Wong&Brewer, 1973. JMarRes, 32.	Chance 2014	Table 3
GEOSECS	109	GEOSECS_109_1304	-2	-4.55	1304	14	434	448	Wong&Brewer, 1973. JMarRes, 32.	Chance 2014	Table 3
GEOSECS	109	GEOSECS_109_1605	-2	-4.55	1605	25	423	448	Wong&Brewer, 1973. JMarRes, 32.	Chance 2014	Table 3
GEOSECS	109	GEOSECS_109_2005	-2	-4.55	2005	0	449		Wong&Brewer, 1973. JMarRes, 32.	Chance 2014	Table 3
GEOSECS	109	GEOSECS_109_2468	-2	-4.55	2468	27	421	448	Wong&Brewer, 1973. JMarRes, 32.	Chance 2014	Table 3
GEOSECS	109	GEOSECS_109_2972	-2	-4.55	2972	0	473		Wong&Brewer, 1973. JMarRes, 32.	Chance 2014	Table 3
GEOSECS	109	GEOSECS_109_3476	-2	-4.55	3476	0	471		Wong&Brewer, 1973. JMarRes, 32.	Chance 2014	Table 3
GEOSECS	109	GEOSECS_109_3976	-2	-4.55	3976	0	477		Wong&Brewer, 1973. JMarRes, 32.	Chance 2014	Table 3
GEOSECS	109	GEOSECS_109_4728	-2	-4.55	4728	4	444	448	Wong&Brewer, 1973. JMarRes, 32.	Chance 2014	Table 3
GEOSECS	109	GEOSECS_109_4979	-2	-4.55	4979	5	443	448	Wong&Brewer, 1973. JMarRes, 32.	Chance 2014	Table 3
GEOSECS	109	GEOSECS_109_5028	-2	-4.55	5028	0	451		Wong&Brewer, 1973. JMarRes, 32.	Chance 2014	Table 3
GEOSECS	109	GEOSECS_109_5078	-2	-4.55	5078	0	450		Wong&Brewer, 1973. JMarRes, 32.	Chance 2014	Table 3
GEOSECS	109	GEOSECS_109_5108	-2	-4.55	5108	11	437	448	Wong&Brewer, 1973. JMarRes, 32.	Chance 2014	Table 3
McTAG	3	McTAG_3_0	-25.9038	153.477	0	140	310	450	McTaggart, A. R., Butler, E. C. V., Haddad, P. R. & Middleton, J. H. Iodide and iodate concentrations in eastern Australian subtropical waters, with iodide by ion chromatography. Mar. Chem. 47, 159-172 (1994).	Chance 2014	Table 2
McTAG	6	McTAG_6_0	-25.8462	153.841	0	150	300	460	McTaggart, A. R., Butler, E. C. V., Haddad, P. R. & Middleton, J. H. Iodide and iodate concentrations in eastern Australian subtropical waters, with iodide by ion chromatography. Mar. Chem. 47, 159-172 (1994).	Chance 2014	Table 2
McTAG	7	McTAG_7_0	-25.8269	153.932	0	150	300	450	McTaggart, A. R., Butler, E. C. V., Haddad, P. R. & Middleton, J. H. Iodide and iodate concentrations in eastern Australian subtropical waters, with iodide by ion chromatography. Mar. Chem. 47, 159-172 (1994).	Chance 2014	Table 2
McTAG	10	McTAG_10_0	-24.5192	153.295	0	130	300	430	McTaggart, A. R., Butler, E. C. V., Haddad, P. R. & Middleton, J. H. Iodide and iodate concentrations in eastern Australian subtropical waters, with iodide by ion chromatography. Mar. Chem. 47, 159-172 (1994).	Chance 2014	Table 2
McTAG	11	McTAG_11_0	-24.5	153.341	0	140	310	450	McTaggart, A. R., Butler, E. C. V., Haddad, P. R. & Middleton, J. H. Iodide and iodate concentrations in eastern Australian subtropical waters, with iodide by ion chromatography. Mar. Chem. 47, 159-172 (1994).	Chance 2014	Table 2
McTAG	12	McTAG_12_0	-24.4808	153.386	0	140	300	440	McTaggart, A. R., Butler, E. C. V., Haddad, P. R. & Middleton, J. H. Iodide and iodate concentrations in eastern Australian subtropical waters, with iodide by ion chromatography. Mar. Chem. 47, 159-172 (1994).	Chance 2014	Table 2
McTAG	13	McTAG_13_0	-24.4615	153.5	0	130	300	430	McTaggart, A. R., Butler, E. C. V., Haddad, P. R. & Middleton, J. H. Iodide and iodate concentrations in eastern Australian subtropical waters, with iodide by ion chromatography. Mar. Chem. 47, 159-172 (1994).	Chance 2014	Table 2
McTAG	23	McTAG_23_0	-24.0769	152.159	0	170	280	450	McTaggart, A. R., Butler, E. C. V., Haddad, P. R. & Middleton, J. H. Iodide and iodate concentrations in eastern Australian subtropical waters, with iodide by ion chromatography. Mar. Chem. 47, 159-172 (1994).	Chance 2014	Table 2
McTAG	24	McTAG_24_0	-24	152.273	0	140	300	430	McTaggart, A. R., Butler, E. C. V., Haddad, P. R. & Middleton, J. H. Iodide and iodate concentrations in eastern Australian subtropical waters, with iodide by ion chromatography. Mar. Chem. 47, 159-172 (1994).	Chance 2014	Table 2
McTAG	25	McTAG_25_0	-23.9615	152.386	0	130	300	430	McTaggart, A. R., Butler, E. C. V., Haddad, P. R. & Middleton, J. H. Iodide and iodate concentrations in eastern Australian subtropical waters, with iodide by ion chromatography. Mar. Chem. 47, 159-172 (1994).	Chance 2014	Table 2
McTAG	26	McTAG_26_0	-23.8846	152.5	0	130	310	440	McTaggart, A. R., Butler, E. C. V., Haddad, P. R. & Middleton, J. H. Iodide and iodate concentrations in eastern Australian subtropical waters, with iodide by ion chromatography. Mar. Chem. 47, 159-172 (1994).	Chance 2014	Table 2
McTAG	27	McTAG_27_0	-23.8077	152.614	0	130	310	440	McTaggart, A. R., Butler, E. C. V., Haddad, P. R. & Middleton, J. H. Iodide and iodate concentrations in eastern Australian subtropical waters, with iodide by ion chromatography. Mar. Chem. 47, 159-172 (1994).	Chance 2014	Table 2
McTAG	28	McTAG_28_0	-23.7308	152.705	0	130	310	440	McTaggart, A. R., Butler, E. C. V., Haddad, P. R. & Middleton, J. H. Iodide and iodate concentrations in eastern Australian subtropical waters, with iodide by ion chromatography. Mar. Chem. 47, 159-172 (1994).	Chance 2014	Table 2
McTAG	23	McTAG_23_30	-24.0769	152.159	30	180	270	450	McTaggart et al., 1994. MarChem, 47 pp159.	Chance 2014	Table 2
McTAG	10	McTAG_10_35	-24.5192	153.295	35	110	320	440	McTaggart et al., 1994. MarChem, 47 pp159.	Chance 2014	Table 2
McTAG	24	McTAG_24_40	-24	152.273	40	140	300	430	McTaggart et al., 1994. MarChem, 47 pp159.	Chance 2014	Table 2
McTAG	3	McTAG_3_50	-25.9038	153.477	50	90	350	440	McTaggart et al., 1994. MarChem, 47 pp159.	Chance 2014	Table 2
McTAG	6	McTAG_6_50	-25.8462	153.841	50	130	320	450	McTaggart et al., 1994. MarChem, 47 pp159.	Chance 2014	Table 2
McTAG	7	McTAG_7_50	-25.8269	153.932	50	130	290	420	McTaggart et al., 1994. MarChem, 47 pp159.	Chance 2014	Table 2
McTAG	11	McTAG_11_50	-24.5	153.341	50	70	380	450	McTaggart et al., 1994. MarChem, 47 pp159.	Chance 2014	Table 2
McTAG	12	McTAG_12_50	-24.4808	153.386	50	70	390	460	McTaggart et al., 1994. MarChem, 47 pp159.	Chance 2014	Table 2
McTAG	13	McTAG_13_50	-24.4615	153.5	50	130	320	450	McTaggart et al., 1994. MarChem, 47 pp159.	Chance 2014	Table 2
McTAG	25	McTAG_25_50	-23.9615	152.386	50	130	300	430	McTaggart et al., 1994. MarChem, 47 pp159.	Chance 2014	Table 2
McTAG	26	McTAG_26_50	-23.8846	152.5	50	130	320	450	McTaggart et al., 1994. MarChem, 47 pp159.	Chance 2014	Table 2
McTAG	27	McTAG_27_50	-23.8077	152.614	50	130	320	450	McTaggart et al., 1994. MarChem, 47 pp159.	Chance 2014	Table 2
McTAG	28	McTAG_28_50	-23.7308	152.705	50	130	310	440	McTaggart et al., 1994. MarChem, 47 pp159.	Chance 2014	Table 2
McTAG	6	McTAG_6_100	-25.8462	153.841	100	20	430	450	McTaggart et al., 1994. MarChem, 47 pp159.	Chance 2014	Table 2
McTAG	7	McTAG_7_100	-25.8269	153.932	100	20	430	450	McTaggart et al., 1994. MarChem, 47 pp159.	Chance 2014	Table 2
McTAG	11	McTAG_11_100	-24.5	153.341	100	20	430	450	McTaggart et al., 1994. MarChem, 47 pp159.	Chance 2014	Table 2
McTAG	12	McTAG_12_100	-24.4808	153.386	100	50	430	480	McTaggart et al., 1994. MarChem, 47 pp159.	Chance 2014	Table 2
McTAG	13	McTAG_13_100	-24.4615	153.5	100	30	430	460	McTaggart et al., 1994. MarChem, 47 pp159.	Chance 2014	Table 2
McTAG	27	McTAG_27_100	-23.8077	152.614	100	30	430	460	McTaggart et al., 1994. MarChem, 47 pp159.	Chance 2014	Table 2
McTAG	28	McTAG_28_100	-23.7308	152.705	100	30	410	440	McTaggart et al., 1994. MarChem, 47 pp159.	Chance 2014	Table 2
McTAG	6	McTAG_6_150	-25.8462	153.841	150	20	430	450	McTaggart et al., 1994. MarChem, 47 pp159.	Chance 2014	Table 2
McTAG	7	McTAG_7_150	-25.8269	153.932	150	30	430	460	McTaggart et al., 1994. MarChem, 47 pp159.	Chance 2014	Table 2
McTAG	12	McTAG_12_150	-24.4808	153.386	150	20	430	450	McTaggart et al., 1994. MarChem, 47 pp159.	Chance 2014	Table 2
McTAG	13	McTAG_13_150	-24.4615	153.5	150	30	420	450	McTaggart et al., 1994. MarChem, 47 pp159.	Chance 2014	Table 2
McTAG	27	McTAG_27_150	-23.8077	152.614	150	20	430	450	McTaggart et al., 1994. MarChem, 47 pp159.	Chance 2014	Table 2
McTAG	28	McTAG_28_150	-23.7308	152.705	150	30	410	440	McTaggart et al., 1994. MarChem, 47 pp159.	Chance 2014	Table 2
McTAG	6	McTAG_6_200	-25.8462	153.841	200	20	430	450	McTaggart et al., 1994. MarChem, 47 pp159.	Chance 2014	Table 2
McTAG	7	McTAG_7_200	-25.8269	153.932	200	20	430	450	McTaggart et al., 1994. MarChem, 47 pp159.	Chance 2014	Table 2
McTAG	12	McTAG_12_200	-24.4808	153.386	200	20	430	450	McTaggart et al., 1994. MarChem, 47 pp159.	Chance 2014	Table 2
McTAG	13	McTAG_13_200	-24.4615	153.5	200	20	430	450	McTaggart et al., 1994. MarChem, 47 pp159.	Chance 2014	Table 2
McTAG	27	McTAG_27_200	-23.8077	152.614	200	20	430	450	McTaggart et al., 1994. MarChem, 47 pp159.	Chance 2014	Table 2
McTAG	28	McTAG_28_200	-23.7308	152.705	200	20	430	450	McTaggart et al., 1994. MarChem, 47 pp159.	Chance 2014	Table 2
McTAG	7	McTAG_7_500	-25.8269	153.932	500	20	440	460	McTaggart et al., 1994. MarChem, 47 pp159.	Chance 2014	Table 2
McTAG	12	McTAG_12_500	-24.4808	153.386	500	10	440	450	McTaggart et al., 1994. MarChem, 47 pp159.	Chance 2014	Table 2
McTAG	13	McTAG_13_500	-24.4615	153.5	500	10	440	450	McTaggart et al., 1994. MarChem, 47 pp159.	Chance 2014	Table 2
McTAG	12	McTAG_12_700	-24.4808	153.386	700	10	440	450	McTaggart et al., 1994. MarChem, 47 pp159.	Chance 2014	Table 2
McTAG	7	McTAG_7_1000	-25.8269	153.932	1000	10	450	460	McTaggart et al., 1994. MarChem, 47 pp159.	Chance 2014	Table 2
McTAG	13	McTAG_13_1000	-24.4615	153.5	1000	10	450	460	McTaggart et al., 1994. MarChem, 47 pp159.	Chance 2014	Table 2
C141	1	C141_1_3	56.5	0.25	3	57	350	407	Truesdale, V. W. & Upstill-Goddard, R. Dissolved iodate and total iodine along the British east coast. Estuar. Coast. Shelf Sci. 56, 261-270 (2003).	Chance 2014
C142	2	C142_2_3	53.5	0.25	3	85	294	379	Truesdale, V. W. & Upstill-Goddard, R. Dissolved iodate and total iodine along the British east coast. Estuar. Coast. Shelf Sci. 56, 261-270 (2003).	Chance 2014
C143	3	C143_3_3	50.3	0.25	3	50	340	390	Truesdale, V. W. & Upstill-Goddard, R. Dissolved iodate and total iodine along the British east coast. Estuar. Coast. Shelf Sci. 56, 261-270 (2003).	Chance 2014
KEEP	1	KEEP_1_7	26.32	120.5	7	105	240	400	Wong, G. T. F. & Zhang, L.-S. Geochemical dynamics of iodine in marginal seas: the southern East China Sea. Deep Sea Res. Part II Top. Stud. Oceanogr. 50, 1147-1162 (2003).	Chance 2014	Figures 2 and 4
KEEP	2	KEEP_2_7	26.22	120.7	7	105	265	420	Wong, G. T. F. & Zhang, L.-S. Geochemical dynamics of iodine in marginal seas: the southern East China Sea. Deep Sea Res. Part II Top. Stud. Oceanogr. 50, 1147-1162 (2003).	Chance 2014	Figures 2 and 4
KEEP	3	KEEP_3_7	26.13	120.85	7	130	225	390	Wong, G. T. F. & Zhang, L.-S. Geochemical dynamics of iodine in marginal seas: the southern East China Sea. Deep Sea Res. Part II Top. Stud. Oceanogr. 50, 1147-1162 (2003).	Chance 2014	Figures 2 and 4
KEEP	4	KEEP_4_7	26.04	121	7	105	230		Wong, G. T. F. & Zhang, L.-S. Geochemical dynamics of iodine in marginal seas: the southern East China Sea. Deep Sea Res. Part II Top. Stud. Oceanogr. 50, 1147-1162 (2003).	Chance 2014	Figures 2 and 4
KEEP	5	KEEP_5_7	25.98	121.2	7	110	245		Wong, G. T. F. & Zhang, L.-S. Geochemical dynamics of iodine in marginal seas: the southern East China Sea. Deep Sea Res. Part II Top. Stud. Oceanogr. 50, 1147-1162 (2003).	Chance 2014	Figures 2 and 4
KEEP	6	KEEP_6_7	25.89	121.35	7	75	210	380	Wong, G. T. F. & Zhang, L.-S. Geochemical dynamics of iodine in marginal seas: the southern East China Sea. Deep Sea Res. Part II Top. Stud. Oceanogr. 50, 1147-1162 (2003).	Chance 2014	Figures 2 and 4
KEEP	7	KEEP_7_7	25.8	121.5	7	95	275		Wong, G. T. F. & Zhang, L.-S. Geochemical dynamics of iodine in marginal seas: the southern East China Sea. Deep Sea Res. Part II Top. Stud. Oceanogr. 50, 1147-1162 (2003).	Chance 2014	Figures 2 and 4
KEEP	8	KEEP_8_7	25.72	121.7	7	90	275	400	Wong, G. T. F. & Zhang, L.-S. Geochemical dynamics of iodine in marginal seas: the southern East China Sea. Deep Sea Res. Part II Top. Stud. Oceanogr. 50, 1147-1162 (2003).	Chance 2014	Figures 2 and 4
KEEP	9	KEEP_9_7	25.61	121.85	7	95	270		Wong, G. T. F. & Zhang, L.-S. Geochemical dynamics of iodine in marginal seas: the southern East China Sea. Deep Sea Res. Part II Top. Stud. Oceanogr. 50, 1147-1162 (2003).	Chance 2014	Figures 2 and 4
KEEP	10	KEEP_10_7	25.55	122	7	65	340	450	Wong, G. T. F. & Zhang, L.-S. Geochemical dynamics of iodine in marginal seas: the southern East China Sea. Deep Sea Res. Part II Top. Stud. Oceanogr. 50, 1147-1162 (2003).	Chance 2014	Figures 2 and 4
KEEP	11	KEEP_11_7	25.46	122.2	7	85			Wong, G. T. F. & Zhang, L.-S. Geochemical dynamics of iodine in marginal seas: the southern East China Sea. Deep Sea Res. Part II Top. Stud. Oceanogr. 50, 1147-1162 (2003).	Chance 2014	Figures 2 and 4
KEEP	11A	KEEP_11A_7	25.41	122.28	7	54	365		Wong, G. T. F. & Zhang, L.-S. Geochemical dynamics of iodine in marginal seas: the southern East China Sea. Deep Sea Res. Part II Top. Stud. Oceanogr. 50, 1147-1162 (2003).	Chance 2014	Figures 2 and 4
KEEP	12	KEEP_12_7	25.38	122.36	7	77			Wong, G. T. F. & Zhang, L.-S. Geochemical dynamics of iodine in marginal seas: the southern East China Sea. Deep Sea Res. Part II Top. Stud. Oceanogr. 50, 1147-1162 (2003).	Chance 2014	Figures 2 and 4
KEEP	13	KEEP_13_7	25.3	122.5	7				Wong&Zhang, 2003.	Chance 2014	Figures 2 and 4
KEEP	14	KEEP_14_7	25.22	122.7	7		270		Wong&Zhang, 2003.	Chance 2014	Figures 2 and 4
KEEP	15	KEEP_15_7	25.12	122.86	7				Wong&Zhang, 2003.	Chance 2014	Figures 2 and 4
KEEP	16	KEEP_16_7	25.02	123.02	7	140	230	360	Wong, G. T. F. & Zhang, L.-S. Geochemical dynamics of iodine in marginal seas: the southern East China Sea. Deep Sea Res. Part II Top. Stud. Oceanogr. 50, 1147-1162 (2003).	Chance 2014	Figures 2 and 4
KEEP	17	KEEP_17_7	24.95	123.13	7				Wong&Zhang, 2003.	Chance 2014	Figures 2 and 4
FLEX	107	FLEX_107_3	31.9	-80.91	3	265	5	270	Wong, G. T. F. & Zhang, L. Changes in iodine speciation across coastal hydrographic fronts in southeastern United States continental shelf waters. Cont. Shelf Res. 12, 717-733 (1992).	Chance 2014	Figures 2 and 5
FLEX	108	FLEX_108_3	31.88	-80.89	3	280	70	350	Wong, G. T. F. & Zhang, L. Changes in iodine speciation across coastal hydrographic fronts in southeastern United States continental shelf waters. Cont. Shelf Res. 12, 717-733 (1992).	Chance 2014	Figures 2 and 5
FLEX	109	FLEX_109_3	31.86	-80.87	3	225	120	345	Wong, G. T. F. & Zhang, L. Changes in iodine speciation across coastal hydrographic fronts in southeastern United States continental shelf waters. Cont. Shelf Res. 12, 717-733 (1992).	Chance 2014	Figures 2 and 5
FLEX	110	FLEX_110_3	31.84	-80.84	3	200	35	235	Wong, G. T. F. & Zhang, L. Changes in iodine speciation across coastal hydrographic fronts in southeastern United States continental shelf waters. Cont. Shelf Res. 12, 717-733 (1992).	Chance 2014 and	Figures 2 and 5
FLEX	111	FLEX_111_3	31.83	-80.83	3	250	25	275	Wong, G. T. F. & Zhang, L. Changes in iodine speciation across coastal hydrographic fronts in southeastern United States continental shelf waters. Cont. Shelf Res. 12, 717-733 (1992).	Chance 2014 and	Figures 2 and 5
FLEX	112	FLEX_112_3	31.81	-80.81	3	230	65	295	Wong, G. T. F. & Zhang, L. Changes in iodine speciation across coastal hydrographic fronts in southeastern United States continental shelf waters. Cont. Shelf Res. 12, 717-733 (1992).	Chance 2014 and	Figures 2 and 5
FLEX	113	FLEX_113_3	31.79	-80.78	3	265	20	285	Wong, G. T. F. & Zhang, L. Changes in iodine speciation across coastal hydrographic fronts in southeastern United States continental shelf waters. Cont. Shelf Res. 12, 717-733 (1992).	Chance 2014 and	Figures 2 and 5
FLEX	114	FLEX_114_3	31.77	-80.77	3	240	220	460	Wong, G. T. F. & Zhang, L. Changes in iodine speciation across coastal hydrographic fronts in southeastern United States continental shelf waters. Cont. Shelf Res. 12, 717-733 (1992).	Chance 2014 and	Figures 2 and 5
FLEX	115	FLEX_115_3	31.75	-80.74	3	135	200	335	Wong, G. T. F. & Zhang, L. Changes in iodine speciation across coastal hydrographic fronts in southeastern United States continental shelf waters. Cont. Shelf Res. 12, 717-733 (1992).	Chance 2014 and	Figures 2 and 5
FLEX	116	FLEX_116_3	31.73	-80.72	3	190	180	370	Wong, G. T. F. & Zhang, L. Changes in iodine speciation across coastal hydrographic fronts in southeastern United States continental shelf waters. Cont. Shelf Res. 12, 717-733 (1992).	Chance 2014 and	Figures 2 and 5
FLEX	117	FLEX_117_3	31.72	-80.7	3	140	200	340	Wong, G. T. F. & Zhang, L. Changes in iodine speciation across coastal hydrographic fronts in southeastern United States continental shelf waters. Cont. Shelf Res. 12, 717-733 (1992).	Chance 2014 and	Figures 2 and 5
FLEX	118	FLEX_118_3	31.66	-80.64	3	150	200	350	Wong, G. T. F. & Zhang, L. Changes in iodine speciation across coastal hydrographic fronts in southeastern United States continental shelf waters. Cont. Shelf Res. 12, 717-733 (1992).	Chance 2014 and	Figures 2 and 5
FLEX	119	FLEX_119_3	31.58	-80.54	3	140	180	320	Wong, G. T. F. & Zhang, L. Changes in iodine speciation across coastal hydrographic fronts in southeastern United States continental shelf waters. Cont. Shelf Res. 12, 717-733 (1992).	Chance 2014 and	Figures 2 and 5
FLEX	120	FLEX_120_3	31.5	-80.46	3	140	200	340	Wong, G. T. F. & Zhang, L. Changes in iodine speciation across coastal hydrographic fronts in southeastern United States continental shelf waters. Cont. Shelf Res. 12, 717-733 (1992).	Chance 2014 and	Figures 2 and 5
FLEX	121	FLEX_121_3	31.45	-80.4	3	145	200	345	Wong, G. T. F. & Zhang, L. Changes in iodine speciation across coastal hydrographic fronts in southeastern United States continental shelf waters. Cont. Shelf Res. 12, 717-733 (1992).	Chance 2014 and	Figures 2 and 5
FLEX	122	FLEX_122_3	31.4	-80.35	3	140	220	360	Wong, G. T. F. & Zhang, L. Changes in iodine speciation across coastal hydrographic fronts in southeastern United States continental shelf waters. Cont. Shelf Res. 12, 717-733 (1992).	Chance 2014 and	Figures 2 and 5
FLEX	123	FLEX_123_3	30.84	-80.51	3	180	210	390	Wong, G. T. F. & Zhang, L. Changes in iodine speciation across coastal hydrographic fronts in southeastern United States continental shelf waters. Cont. Shelf Res. 12, 717-733 (1992).	Chance 2014 and	Figures 2 and 5
FLEX	124	FLEX_124_3	30.86	-80.6	3	170	210	380	Wong, G. T. F. & Zhang, L. Changes in iodine speciation across coastal hydrographic fronts in southeastern United States continental shelf waters. Cont. Shelf Res. 12, 717-733 (1992).	Chance 2014 and	Figures 3 and 6
FLEX	125	FLEX_125_3	30.88	-80.7	3	160	220	380	Wong, G. T. F. & Zhang, L. Changes in iodine speciation across coastal hydrographic fronts in southeastern United States continental shelf waters. Cont. Shelf Res. 12, 717-733 (1992).	Chance 2014 and	Figures 3 and 6
FLEX	126	FLEX_126_3	30.91	-80.81	3	140	130	270	Wong, G. T. F. & Zhang, L. Changes in iodine speciation across coastal hydrographic fronts in southeastern United States continental shelf waters. Cont. Shelf Res. 12, 717-733 (1992).	Chance 2014 and	Figures 3 and 6
FLEX	127	FLEX_127_3	30.93	-80.9	3	120	200	320	Wong, G. T. F. & Zhang, L. Changes in iodine speciation across coastal hydrographic fronts in southeastern United States continental shelf waters. Cont. Shelf Res. 12, 717-733 (1992).	Chance 2014 and	Figures 3 and 6
FLEX	128	FLEX_128_3	30.96	-81.03	3	160	155	315	Wong, G. T. F. & Zhang, L. Changes in iodine speciation across coastal hydrographic fronts in southeastern United States continental shelf waters. Cont. Shelf Res. 12, 717-733 (1992).	Chance 2014 and	Figures 3 and 6
FLEX	129	FLEX_129_3	30.97	-81.08	3	205	120	325	Wong, G. T. F. & Zhang, L. Changes in iodine speciation across coastal hydrographic fronts in southeastern United States continental shelf waters. Cont. Shelf Res. 12, 717-733 (1992).	Chance 2014 and	Figures 3 and 6
FLEX	130	FLEX_130_3	30.98	-81.12	3	85	175	260	Wong, G. T. F. & Zhang, L. Changes in iodine speciation across coastal hydrographic fronts in southeastern United States continental shelf waters. Cont. Shelf Res. 12, 717-733 (1992).	Chance 2014 and	Figures 3 and 6
FLEX	131	FLEX_131_3	30.99	-81.17	3	40	90	130	Wong, G. T. F. & Zhang, L. Changes in iodine speciation across coastal hydrographic fronts in southeastern United States continental shelf waters. Cont. Shelf Res. 12, 717-733 (1992).	Chance 2014 and	Figures 3 and 6
FLEX	132	FLEX_132_3	31	-81.22	3	250	45	295	Wong, G. T. F. & Zhang, L. Changes in iodine speciation across coastal hydrographic fronts in southeastern United States continental shelf waters. Cont. Shelf Res. 12, 717-733 (1992).	Chance 2014 and	Figures 3 and 6
FLEX	133	FLEX_133_3	31.01	-81.27	3	200	30	230	Wong, G. T. F. & Zhang, L. Changes in iodine speciation across coastal hydrographic fronts in southeastern United States continental shelf waters. Cont. Shelf Res. 12, 717-733 (1992).	Chance 2014 and	Figures 3 and 6
FLEX	134	FLEX_134_3	31.02	-81.31	3	160	20	180	Wong, G. T. F. & Zhang, L. Changes in iodine speciation across coastal hydrographic fronts in southeastern United States continental shelf waters. Cont. Shelf Res. 12, 717-733 (1992).	Chance 2014 and	Figures 3 and 6
FLEX	135	FLEX_135_3	31.04	-81.4	3	300	55	355	Wong, G. T. F. & Zhang, L. Changes in iodine speciation across coastal hydrographic fronts in southeastern United States continental shelf waters. Cont. Shelf Res. 12, 717-733 (1992).	Chance 2014 and	Figures 3 and 6
FLEX	136	FLEX_136_3	30.08	-80.56	3	40	250	290	Wong, G. T. F. & Zhang, L. Changes in iodine speciation across coastal hydrographic fronts in southeastern United States continental shelf waters. Cont. Shelf Res. 12, 717-733 (1992).	Chance 2014 and	Figures 4 and 7
FLEX	152	FLEX_152_3	29.97	-81.05	3	205	160	365	Wong, G. T. F. & Zhang, L. Changes in iodine speciation across coastal hydrographic fronts in southeastern United States continental shelf waters. Cont. Shelf Res. 12, 717-733 (1992).	Chance 2014 and	Figures 4 and 7
FLEX	153	FLEX_153_3	29.96	-81.06	3	200	155	355	Wong, G. T. F. & Zhang, L. Changes in iodine speciation across coastal hydrographic fronts in southeastern United States continental shelf waters. Cont. Shelf Res. 12, 717-733 (1992).	Chance 2014 and	Figures 4 and 7
FLEX	154	FLEX_154_3	29.95	-81.09	3	115	190	305	Wong, G. T. F. & Zhang, L. Changes in iodine speciation across coastal hydrographic fronts in southeastern United States continental shelf waters. Cont. Shelf Res. 12, 717-733 (1992).	Chance 2014 and	Figures 4 and 7
FLEX	155	FLEX_155_3	29.95	-81.11	3	250	130	380	Wong, G. T. F. & Zhang, L. Changes in iodine speciation across coastal hydrographic fronts in southeastern United States continental shelf waters. Cont. Shelf Res. 12, 717-733 (1992).	Chance 2014 and	Figures 4 and 7
FLEX	156	FLEX_156_3	29.94	-81.13	3	240	110	350	Wong, G. T. F. & Zhang, L. Changes in iodine speciation across coastal hydrographic fronts in southeastern United States continental shelf waters. Cont. Shelf Res. 12, 717-733 (1992).	Chance 2014 and	Figures 4 and 7
FLEX	157	FLEX_157_3	29.94	-81.15	3	290	30	320	Wong, G. T. F. & Zhang, L. Changes in iodine speciation across coastal hydrographic fronts in southeastern United States continental shelf waters. Cont. Shelf Res. 12, 717-733 (1992).	Chance 2014 and	Figures 4 and 7
FLEX	158	FLEX_158_3	29.93	-81.18	3	270	0	270	Wong, G. T. F. & Zhang, L. Changes in iodine speciation across coastal hydrographic fronts in southeastern United States continental shelf waters. Cont. Shelf Res. 12, 717-733 (1992).	Chance 2014 and	Figures 4 and 7
FLEX	159	FLEX_159_3	29.93	-81.19	3	180	25	205	Wong, G. T. F. & Zhang, L. Changes in iodine speciation across coastal hydrographic fronts in southeastern United States continental shelf waters. Cont. Shelf Res. 12, 717-733 (1992).	Chance 2014 and	Figures 4 and 7
FLEX	160	FLEX_160_3	29.92	-81.21	3	140	60	200	Wong, G. T. F. & Zhang, L. Changes in iodine speciation across coastal hydrographic fronts in southeastern United States continental shelf waters. Cont. Shelf Res. 12, 717-733 (1992).	Chance 2014 and	Figures 4 and 7
FLEX	161	FLEX_161_3	29.92	-81.23	3	220	100	320	Wong, G. T. F. & Zhang, L. Changes in iodine speciation across coastal hydrographic fronts in southeastern United States continental shelf waters. Cont. Shelf Res. 12, 717-733 (1992).	Chance 2014 and	Figures 4 and 7
FLEX	162	FLEX_162_3	29.9	-81.28	3	285	50	335	Wong, G. T. F. & Zhang, L. Changes in iodine speciation across coastal hydrographic fronts in southeastern United States continental shelf waters. Cont. Shelf Res. 12, 717-733 (1992).	Chance 2014 and	Figures 4 and 7
JCR10	CTD006	JCR10_CTD006_5.4	-72.2752	-17.2266	5.4		467.3	483.9	Campos et al., 1999.	Chance 2014
JCR10	CTD003	JCR10_CTD003_5.7	-72.4609	-16.5224	5.7		481.5	509.8	Campos et al., 1999.	Chance 2014
JCR10	CTD005	JCR10_CTD005_5.7	-72.3447	-17.0336	5.7		473.8		Campos et al., 1999.	Chance 2014
JCR10	CTD004	JCR10_CTD004_5.8	-72.38	-16.9472	5.8		464.1	540.4	Campos et al., 1999.	Chance 2014
JCR10	CTD010	JCR10_CTD010_5.9	-71.8478	-18.5219	5.9		507.2		Campos et al., 1999.	Chance 2014
JCR10	CTD001	JCR10_CTD001_6.1	-55.5142	-58.6101	6.1			490.8	Campos et al., 1999.	Chance 2014
JCR10	CTD009	JCR10_CTD009_6.7	-71.9558	-18.222	6.7		459.2	480.3	Campos et al., 1999.	Chance 2014
JCR10	CTD011	JCR10_CTD011_7	-71.7053	-18.8634	7		482.4		Campos et al., 1999.	Chance 2014
JCR10	CTD007	JCR10_CTD007_8	-72.1861	-17.4623	8		473.5		Campos et al., 1999.	Chance 2014
JCR10	CTD096	JCR10_CTD096_2.6	-38.8691	-35.9964	2.6	98.6	375.1	485.7	Campos, M. L. A., Sanders, R. & Jickells, T. D. The dissolved iodate and iodide distribution in the South Atlantic from the Weddell Sea to Brazil. Mar. Chem. 65, 167-175 (1999).	Chance 2014
JCR10	CTD099	JCR10_CTD099_3.1	-35.8644	-35.9991	3.1	76	377.1	464.5	Campos, M. L. A., Sanders, R. & Jickells, T. D. The dissolved iodate and iodide distribution in the South Atlantic from the Weddell Sea to Brazil. Mar. Chem. 65, 167-175 (1999).	Chance 2014
JCR10	CTD095	JCR10_CTD095_3.3	-39.8673	-36.0131	3.3		394.1		Campos et al., 1999.	Chance 2014
JCR10	CTD088	JCR10_CTD088_3.4	-44.0683	-35.9941	3.4	49.3	409.9	471.1	Campos, M. L. A., Sanders, R. & Jickells, T. D. The dissolved iodate and iodide distribution in the South Atlantic from the Weddell Sea to Brazil. Mar. Chem. 65, 167-175 (1999).	Chance 2014
JCR10	CTD071	JCR10_CTD071_3.5	-48.9338	-35.9191	3.5		462.5		Campos et al., 1999.	Chance 2014
JCR10	CTD092	JCR10_CTD092_4.2	-42.1999	-35.9982	4.2		390.4		Campos et al., 1999.	Chance 2014
JCR10	CTD102	JCR10_CTD102_4.2	-33.8681	-36.0029	4.2		378.7		Campos et al., 1999.	Chance 2014
JCR10	CTD087	JCR10_CTD087_4.4	-44.8674	-36.002	4.4		411.6		Campos et al., 1999.	Chance 2014
JCR10	CTD081	JCR10_CTD081_4.6	-48.066	-36.0026	4.6	44.6	439.7	497.3	Campos, M. L. A., Sanders, R. & Jickells, T. D. The dissolved iodate and iodide distribution in the South Atlantic from the Weddell Sea to Brazil. Mar. Chem. 65, 167-175 (1999).	Chance 2014
JCR10	CTD093	JCR10_CTD093_4.7	-41.5382	-35.9887	4.7	80.4	372	463.9	Campos, M. L. A., Sanders, R. & Jickells, T. D. The dissolved iodate and iodide distribution in the South Atlantic from the Weddell Sea to Brazil. Mar. Chem. 65, 167-175 (1999).	Chance 2014
JCR10	CTD078	JCR10_CTD078_4.9	-49.2311	-35.8086	4.9	23.5	444.3	499.4	Campos, M. L. A., Sanders, R. & Jickells, T. D. The dissolved iodate and iodide distribution in the South Atlantic from the Weddell Sea to Brazil. Mar. Chem. 65, 167-175 (1999).	Chance 2014
JCR10	CTD084	JCR10_CTD084_4.9	-46.8727	-35.9995	4.9		439.9		Campos et al., 1999.	Chance 2014
JCR10	CTD053	JCR10_CTD053_5	-54.8269	-34.6839	5		341.1		Campos et al., 1999.	Chance 2014
JCR10	CTD035	JCR10_CTD035_5.1	-60.3153	-30.9614	5.1		469.5		Campos et al., 1999.	Chance 2014
JCR10	CTD061	JCR10_CTD061_5.1	-52.6327	-35.0011	5.1	40	486.9	539.1	Campos, M. L. A., Sanders, R. & Jickells, T. D. The dissolved iodate and iodide distribution in the South Atlantic from the Weddell Sea to Brazil. Mar. Chem. 65, 167-175 (1999).	Chance 2014
JCR10	CTD063	JCR10_CTD063_5.1	-51.7019	-35.2493	5.1		485.5		Campos et al., 1999.	Chance 2014
JCR10	CTD065	JCR10_CTD065_5.2	-50.7085	-35.4148	5.2		456.6		Campos et al., 1999.	Chance 2014
JCR10	CTD080	JCR10_CTD080_5.3	-48.6001	-35.9936	5.3		445.4		Campos et al., 1999.	Chance 2014
JCR10	CTD097	JCR10_CTD097_5.4	-37.8978	-35.9841	5.4		378.3		Campos et al., 1999.	Chance 2014
JCR10	CTD090	JCR10_CTD090_5.5	-43.3661	-36.0006	5.5		406.3		Campos et al., 1999.	Chance 2014
JCR10	CTD094	JCR10_CTD094_5.5	-40.8754	-35.983	5.5		387.8		Campos et al., 1999.	Chance 2014
JCR10	CTD068	JCR10_CTD068_5.6	-49.5857	-35.6237	5.6		452.4		Campos et al., 1999.	Chance 2014
JCR10	CTD062	JCR10_CTD062_5.7	-52.1984	-35.1746	5.7		477.2		Campos et al., 1999.	Chance 2014
JCR10	CTD074	JCR10_CTD074_5.7	-50.4607	-35.4642	5.7	24.7	488.7		Campos, M. L. A., Sanders, R. & Jickells, T. D. The dissolved iodate and iodide distribution in the South Atlantic from the Weddell Sea to Brazil. Mar. Chem. 65, 167-175 (1999).	Chance 2014
JCR10	CTD100	JCR10_CTD100_5.7	-34.867	-35.9924	5.7		391.4		Campos et al., 1999.	Chance 2014
JCR10	CTD082	JCR10_CTD082_6.1	-47.5359	-35.999	6.1		444.2		Campos et al., 1999.	Chance 2014
JCR10	CTD047	JCR10_CTD047_6.3	-56.3816	-32.8735	6.3	36.1	443.4	493.2	Campos, M. L. A., Sanders, R. & Jickells, T. D. The dissolved iodate and iodide distribution in the South Atlantic from the Weddell Sea to Brazil. Mar. Chem. 65, 167-175 (1999).	Chance 2014
JCR10	CTD091	JCR10_CTD091_6.3	-42.8659	-36.0072	6.3		383		Campos et al., 1999.	Chance 2014
JCR10	CTD021	JCR10_CTD021_6.4	-66.3602	-26.0986	6.4		461.5	489.4	Campos et al., 1999.	Chance 2014
JCR10	CTD070	JCR10_CTD070_6.4	-49.1486	-35.8627	6.4		469.6		Campos et al., 1999.	Chance 2014
JCR10	CTD059	JCR10_CTD059_6.5	-53.5009	-34.8331	6.5		475.2		Campos et al., 1999.	Chance 2014
JCR10	CTD066	JCR10_CTD066_6.5	-50.2077	-35.4898	6.5		465.6		Campos et al., 1999.	Chance 2014
JCR10	CTD012	JCR10_CTD012_6.7	-72.4936	-22.9229	6.7		476.3		Campos et al., 1999.	Chance 2014
JCR10	CTD057	JCR10_CTD057_6.7	-54.2187	-34.6686	6.7		474.1		Campos et al., 1999.	Chance 2014
JCR10	CTD086	JCR10_CTD086_6.7	-45.8662	-36.0013	6.7	46.7	440.5	500.5	Campos, M. L. A., Sanders, R. & Jickells, T. D. The dissolved iodate and iodide distribution in the South Atlantic from the Weddell Sea to Brazil. Mar. Chem. 65, 167-175 (1999).	Chance 2014
JCR10	CTD018	JCR10_CTD018_6.8	-69.0568	-22.6289	6.8		448.1		Campos et al., 1999.	Chance 2014
JCR10	CTD054	JCR10_CTD054_6.8	-54.7183	-34.6718	6.8		400.9		Campos et al., 1999.	Chance 2014
JCR10	CTD025	JCR10_CTD025_6.9	-63.3465	-29.5724	6.9		444.4		Campos et al., 1999.	Chance 2014
JCR10	CTD016	JCR10_CTD016_7.2	-70.2559	-20.9892	7.2		455.9		Campos et al., 1999.	Chance 2014
JCR10	CTD038	JCR10_CTD038_7.2	-59.6744	-30.898	7.2	32.2	461.5	506.5	Campos, M. L. A., Sanders, R. & Jickells, T. D. The dissolved iodate and iodide distribution in the South Atlantic from the Weddell Sea to Brazil. Mar. Chem. 65, 167-175 (1999).	Chance 2014
JCR10	CTD067	JCR10_CTD067_7.6	-49.8355	-35.584	7.6		445.7		Campos et al., 1999.	Chance 2014
JCR10	CTD079	JCR10_CTD079_7.7	-48.9149	-35.9495	7.7		446.8		Campos et al., 1999.	Chance 2014
JCR10	CTD027	JCR10_CTD027_7.9	-62.7825	-30.6919	7.9	21.4	447.8	482	Campos, M. L. A., Sanders, R. & Jickells, T. D. The dissolved iodate and iodide distribution in the South Atlantic from the Weddell Sea to Brazil. Mar. Chem. 65, 167-175 (1999).	Chance 2014
JCR10	CTD020	JCR10_CTD020_8	-67.2601	-24.9929	8		476.6		Campos et al., 1999.	Chance 2014
JCR10	CTD033	JCR10_CTD033_8	-61.1091	-31.0412	8	19.7	442	474.2	Campos, M. L. A., Sanders, R. & Jickells, T. D. The dissolved iodate and iodide distribution in the South Atlantic from the Weddell Sea to Brazil. Mar. Chem. 65, 167-175 (1999).	Chance 2014
JCR10	CTD034	JCR10_CTD034_8	-60.7	-31.0078	8		452.5		Campos et al., 1999.	Chance 2014
JCR10	CTD044	JCR10_CTD044_8.1	-57.4581	-31.3275	8.1		431.5		Campos et al., 1999.	Chance 2014
JCR10	CTD055	JCR10_CTD055_8.2	-54.4384	-34.6788	8.2		342.7		Campos et al., 1999.	Chance 2014
JCR10	CTD077	JCR10_CTD077_8.2	-49.5477	-35.6404	8.2		478.7		Campos et al., 1999.	Chance 2014
JCR10	CTD017	JCR10_CTD017_8.3	-69.6557	-21.8212	8.3		475.5		Campos et al., 1999.	Chance 2014
JCR10	CTD019	JCR10_CTD019_8.3	-68.1564	-23.8313	8.3		454.8		Campos et al., 1999.	Chance 2014
JCR10	CTD051	JCR10_CTD051_8.4	-55.2592	-34.4441	8.4		437.8		Campos et al., 1999.	Chance 2014
JCR10	CTD073	JCR10_CTD073_8.4	-50.709	-35.4171	8.4	34.2	455.5	503.3	Campos, M. L. A., Sanders, R. & Jickells, T. D. The dissolved iodate and iodide distribution in the South Atlantic from the Weddell Sea to Brazil. Mar. Chem. 65, 167-175 (1999).	Chance 2014
JCR10	CTD039	JCR10_CTD039_8.5	-59.4346	-30.8634	8.5		372.1		Campos et al., 1999.	Chance 2014
JCR10	CTD049	JCR10_CTD049_8.5	-55.7249	-33.7867	8.5		476.5		Campos et al., 1999.	Chance 2014
JCR10	CTD014	JCR10_CTD014_8.6	-71.3052	-19.5009	8.6				Campos et al., 1999.	Chance 2014
JCR10	CTD026	JCR10_CTD026_8.7	-63.0739	-30.1138	8.7		952		Campos et al., 1999.	Chance 2014
JCR10	CTD050	JCR10_CTD050_8.7	-55.4857	-34.1322	8.7		353.2		Campos et al., 1999.	Chance 2014
JCR10	CTD069	JCR10_CTD069_8.8	-49.3347	-35.6584	8.8		459.2		Campos et al., 1999.	Chance 2014
JCR10	CTD015	JCR10_CTD015_8.9	-70.8543	-20.1332	8.9		472.9		Campos et al., 1999.	Chance 2014
JCR10	CTD037	JCR10_CTD037_8.9	-59.7671	-30.9046	8.9		455		Campos et al., 1999.	Chance 2014
JCR10	CTD024	JCR10_CTD024_9.1	-63.9647	-28.8787	9.1		483.1		Campos et al., 1999.	Chance 2014
JCR10	CTD040	JCR10_CTD040_9.1	-59.0505	-30.8288	9.1	24.1	465.9	503.4	Campos, M. L. A., Sanders, R. & Jickells, T. D. The dissolved iodate and iodide distribution in the South Atlantic from the Weddell Sea to Brazil. Mar. Chem. 65, 167-175 (1999).	Chance 2014
JCR10	CTD036	JCR10_CTD036_9.2	-59.9952	-30.929	9.2		456.6		Campos et al., 1999.	Chance 2014
JCR10	CTD075	JCR10_CTD075_9.3	-50.2119	-35.5112	9.3		451.7		Campos et al., 1999.	Chance 2014
JCR10	CTD048	JCR10_CTD048_9.4	-55.9907	-33.4198	9.4		441.5		Campos et al., 1999.	Chance 2014
JCR10	CTD032	JCR10_CTD032_9.5	-61.1706	-31.048	9.5		464.7		Campos et al., 1999.	Chance 2014
JCR10	CTD064	JCR10_CTD064_9.5	-51.1986	-35.3356	9.5		438.2		Campos et al., 1999.	Chance 2014
JCR10	CTD023	JCR10_CTD023_9.7	-64.5655	-28.2054	9.7		499.3		Campos et al., 1999.	Chance 2014
JCR10	CTD103	JCR10_CTD103_10	-33.5397	-35.9945	10		325.4		Campos et al., 1999.	Chance 2014
JCR10	CTD022	JCR10_CTD022_10.2	-65.4613	-27.1733	10.2		451.7		Campos et al., 1999.	Chance 2014
JCR10	CTD031	JCR10_CTD031_10.2	-61.5507	-31.103	10.2		430.7		Campos et al., 1999.	Chance 2014
JCR10	CTD029	JCR10_CTD029_10.3	-62.0763	-31.1841	10.3		436.6		Campos et al., 1999.	Chance 2014
JCR10	CTD056	JCR10_CTD056_10.3	-54.2946	-34.6748	10.3	19.5	460.5	493.5	Campos, M. L. A., Sanders, R. & Jickells, T. D. The dissolved iodate and iodide distribution in the South Atlantic from the Weddell Sea to Brazil. Mar. Chem. 65, 167-175 (1999).	Chance 2014
JCR10	CTD060	JCR10_CTD060_10.3	-53.0836	-34.9109	10.3		468.9		Campos et al., 1999.	Chance 2014
JCR10	CTD046	JCR10_CTD046_10.5	-56.7757	-32.3065	10.5		454.9		Campos et al., 1999.	Chance 2014
JCR10	CTD028	JCR10_CTD028_10.6	-62.4919	-31.2624	10.6		446.2		Campos et al., 1999.	Chance 2014
JCR10	CTD052	JCR10_CTD052_11.1	-55.2151	-34.5078	11.1		452.6		Campos et al., 1999.	Chance 2014
JCR10	CTD043	JCR10_CTD043_11.4	-57.8016	-30.832	11.4		450.1		Campos et al., 1999.	Chance 2014
JCR10	CTD076	JCR10_CTD076_13.2	-49.873	-35.5748	13.2				Campos et al., 1999.	Chance 2014
JCR10	CTD042	JCR10_CTD042_16.8	-58.212	-30.8217	16.8		462.3		Campos et al., 1999.	Chance 2014
JCR10	CTD058	JCR10_CTD058_17.2	-53.8997	-35.02	17.2		469.6		Campos et al., 1999.	Chance 2014
JCR10	CTD041	JCR10_CTD041_17.5	-58.6348	-30.8232	17.5		449.9		Campos et al., 1999.	Chance 2014
JCR10	CTD101	JCR10_CTD101_18	-34.3662	-35.9902	18		386.2		Campos et al., 1999.	Chance 2014
JCR10	CTD105	JCR10_CTD105_1.1	-32.847	-35.9878	1.1		365.1		Campos et al., 1999.	Chance 2014
JCR10	CTD111	JCR10_CTD111_1.2	-30.6911	-36.2563	1.2		339.8		Campos et al., 1999.	Chance 2014
JCR10	CTD123	JCR10_CTD123_1.9	-27.5256	-39.2605	1.9		353.5	499.1	Campos et al., 1999.	Chance 2014
JCR10	CTD107	JCR10_CTD107_2.4	-31.9997	-36.0072	2.4		370.9		Campos et al., 1999.	Chance 2014
JCR10	CTD113	JCR10_CTD113_3	-30.0045	-36.8805	3		354.1		Campos et al., 1999.	Chance 2014
JCR10	CTD128	JCR10_CTD128_3.3	-26.2525	-41.3451	3.3		320.2		Campos et al., 1999.	Chance 2014
JCR10	CTD109	JCR10_CTD109_3.5	-31.2525	-36.0074	3.5	110.3	407	504.5	Campos, M. L. A., Sanders, R. & Jickells, T. D. The dissolved iodate and iodide distribution in the South Atlantic from the Weddell Sea to Brazil. Mar. Chem. 65, 167-175 (1999).	Chance 2014
JCR10	CTD126	JCR10_CTD126_3.5	-26.7487	-40.4513	3.5				Campos et al., 1999.	Chance 2014
JCR10	CTD127	JCR10_CTD127_3.6	-26.6478	-40.6421	3.6				Campos et al., 1999.	Chance 2014
JCR10	CTD124	JCR10_CTD124_3.8	-27.2896	-39.4797	3.8		322.2		Campos et al., 1999.	Chance 2014
JCR10	CTD115	JCR10_CTD115_4.4	-29.7279	-37.1411	4.4		298		Campos et al., 1999.	Chance 2014
JCR10	CTD114	JCR10_CTD114_4.9	-29.8561	-37.0254	4.9		275.8		Campos et al., 1999.	Chance 2014
JCR10	CTD117	JCR10_CTD117_5.2	-29.4394	-37.4397	5.2		365		Campos et al., 1999.	Chance 2014
JCR10	CTD121	JCR10_CTD121_5.4	-28.1962	-38.6259	5.4		351.9		Campos et al., 1999.	Chance 2014
JCR10	CTD110	JCR10_CTD110_5.5	-31.0177	-36.0032	5.5		347		Campos et al., 1999.	Chance 2014
JCR10	CTD116	JCR10_CTD116_5.5	-29.6116	-37.268	5.5		338.1		Campos et al., 1999.	Chance 2014
JCR10	CTD118	JCR10_CTD118_5.7	-29.0921	-37.7692	5.7		355.1		Campos et al., 1999.	Chance 2014
JCR10	CTD112	JCR10_CTD112_5.8	-30.3215	-36.5735	5.8		347.2		Campos et al., 1999.	Chance 2014
JCR10	CTD104	JCR10_CTD104_6.3	-33.0881	-36.0006	6.3		367.9		Campos et al., 1999.	Chance 2014
JCR10	CTD120	JCR10_CTD120_6.6	-28.5324	-38.3064	6.6		188.8		Campos et al., 1999.	Chance 2014
JCR10	CTD108	JCR10_CTD108_7	-31.5519	-36.0062	7		327.7		Campos et al., 1999.	Chance 2014
JCR10	CTD106	JCR10_CTD106_7.4	-32.5638	-35.9938	7.4		340.4		Campos et al., 1999.	Chance 2014
JCR10	CTD122	JCR10_CTD122_7.7	-27.8616	-38.9439	7.7		332.1		Campos et al., 1999.	Chance 2014
JCR10	CTD032	JCR10_CTD032_29.1	-61.1706	-31.048	29.1		466.6		Campos et al., 1999.	Chance 2014
JCR10	CTD025	JCR10_CTD025_32	-63.3465	-29.5724	32		458.1		Campos et al., 1999.	Chance 2014
JCR10	CTD024	JCR10_CTD024_33.2	-63.9647	-28.8787	33.2		478		Campos et al., 1999.	Chance 2014
JCR10	CTD071	JCR10_CTD071_45.9	-48.9338	-35.9191	45.9		465.4		Campos et al., 1999.	Chance 2014
JCR10	CTD100	JCR10_CTD100_46.4	-34.867	-35.9924	46.4		412.1		Campos et al., 1999.	Chance 2014
JCR10	CTD012	JCR10_CTD012_48.5	-72.4936	-22.9229	48.5		486.8		Campos et al., 1999.	Chance 2014
JCR10	CTD053	JCR10_CTD053_48.8	-54.8269	-34.6839	48.8		336.2		Campos et al., 1999.	Chance 2014
JCR10	CTD095	JCR10_CTD095_48.9	-39.8673	-36.0131	48.9		414.9		Campos et al., 1999.	Chance 2014
JCR10	CTD001	JCR10_CTD001_49.1	-55.5142	-58.6101	49.1			493.7	Campos et al., 1999.	Chance 2014
JCR10	CTD099	JCR10_CTD099_50.1	-35.8644	-35.9991	50.1	76.3	389.1	477.1	Campos et al., 1999.	Chance 2014
JCR10	CTD087	JCR10_CTD087_50.4	-44.8674	-36.002	50.4		432.4		Campos et al., 1999.	Chance 2014
JCR10	CTD003	JCR10_CTD003_50.8	-72.4609	-16.5224	50.8		493.7	506.1	Campos et al., 1999.	Chance 2014
JCR10	CTD010	JCR10_CTD010_50.8	-71.8478	-18.5219	50.8		491.2		Campos et al., 1999.	Chance 2014
JCR10	CTD088	JCR10_CTD088_50.9	-44.0683	-35.9941	50.9	65.4	418.1	495.9	Campos et al., 1999.	Chance 2014
JCR10	CTD113	JCR10_CTD113_51	-30.0045	-36.8805	51		361.6		Campos et al., 1999.	Chance 2014
JCR10	CTD006	JCR10_CTD006_51.1	-72.2752	-17.2266	51.1		465.1	494.1	Campos et al., 1999.	Chance 2014
JCR10	CTD027	JCR10_CTD027_51.2	-62.7825	-30.6919	51.2	32.4	444.2	489.3	Campos et al., 1999.	Chance 2014
JCR10	CTD102	JCR10_CTD102_51.2	-33.8681	-36.0029	51.2		395.1		Campos et al., 1999.	Chance 2014
JCR10	CTD109	JCR10_CTD109_51.3	-31.2525	-36.0074	51.3	111.5	406.9	504.7	Campos et al., 1999.	Chance 2014
JCR10	CTD005	JCR10_CTD005_51.4	-72.3447	-17.0336	51.4		474.3		Campos et al., 1999.	Chance 2014
JCR10	CTD009	JCR10_CTD009_51.4	-71.9558	-18.222	51.4		462.5	477.2	Campos et al., 1999.	Chance 2014
JCR10	CTD025	JCR10_CTD025_51.4	-63.3465	-29.5724	51.4		442.8		Campos et al., 1999.	Chance 2014
JCR10	CTD033	JCR10_CTD033_51.5	-61.1091	-31.0412	51.5	15.6	451.2	479.3	Campos et al., 1999.	Chance 2014
JCR10	CTD086	JCR10_CTD086_51.5	-45.8662	-36.0013	51.5	37	435.5	485.5	Campos et al., 1999.	Chance 2014
JCR10	CTD004	JCR10_CTD004_51.6	-72.38	-16.9472	51.6		461.1	544.6	Campos et al., 1999.	Chance 2014
JCR10	CTD035	JCR10_CTD035_51.6	-60.3153	-30.9614	51.6		466.8		Campos et al., 1999.	Chance 2014
JCR10	CTD051	JCR10_CTD051_51.6	-55.2592	-34.4441	51.6		410.3		Campos et al., 1999.	Chance 2014
JCR10	CTD098	JCR10_CTD098_51.6	-36.8636	-35.9941	51.6		480.9		Campos et al., 1999.	Chance 2014
JCR10	CTD054	JCR10_CTD054_51.8	-54.7183	-34.6718	51.8		401.8		Campos et al., 1999.	Chance 2014
JCR10	CTD115	JCR10_CTD115_51.8	-29.7279	-37.1411	51.8		311.5		Campos et al., 1999.	Chance 2014
JCR10	CTD038	JCR10_CTD038_51.9	-59.6744	-30.898	51.9	26.2	464.7	504.5	Campos et al., 1999.	Chance 2014
JCR10	CTD055	JCR10_CTD055_51.9	-54.4384	-34.6788	51.9		352.5		Campos et al., 1999.	Chance 2014
JCR10	CTD044	JCR10_CTD044_52	-57.4581	-31.3275	52		432.1		Campos et al., 1999.	Chance 2014
JCR10	CTD047	JCR10_CTD047_52	-56.3816	-32.8735	52	33.1	442.7	489.1	Campos et al., 1999.	Chance 2014
[truncated: 8,705 more rows]
