# Supplementary material for: Characterizing the marine iodine cycle and its relationship to ocean deoxygenation in an Earth system model
Source: Copernicus journal article supplement (doi:10.5194/bg-21-4927-2024), 2024-11-13
Supplement: Supplementary file 2 [file bg-21-4927-2024-supplement.zip]

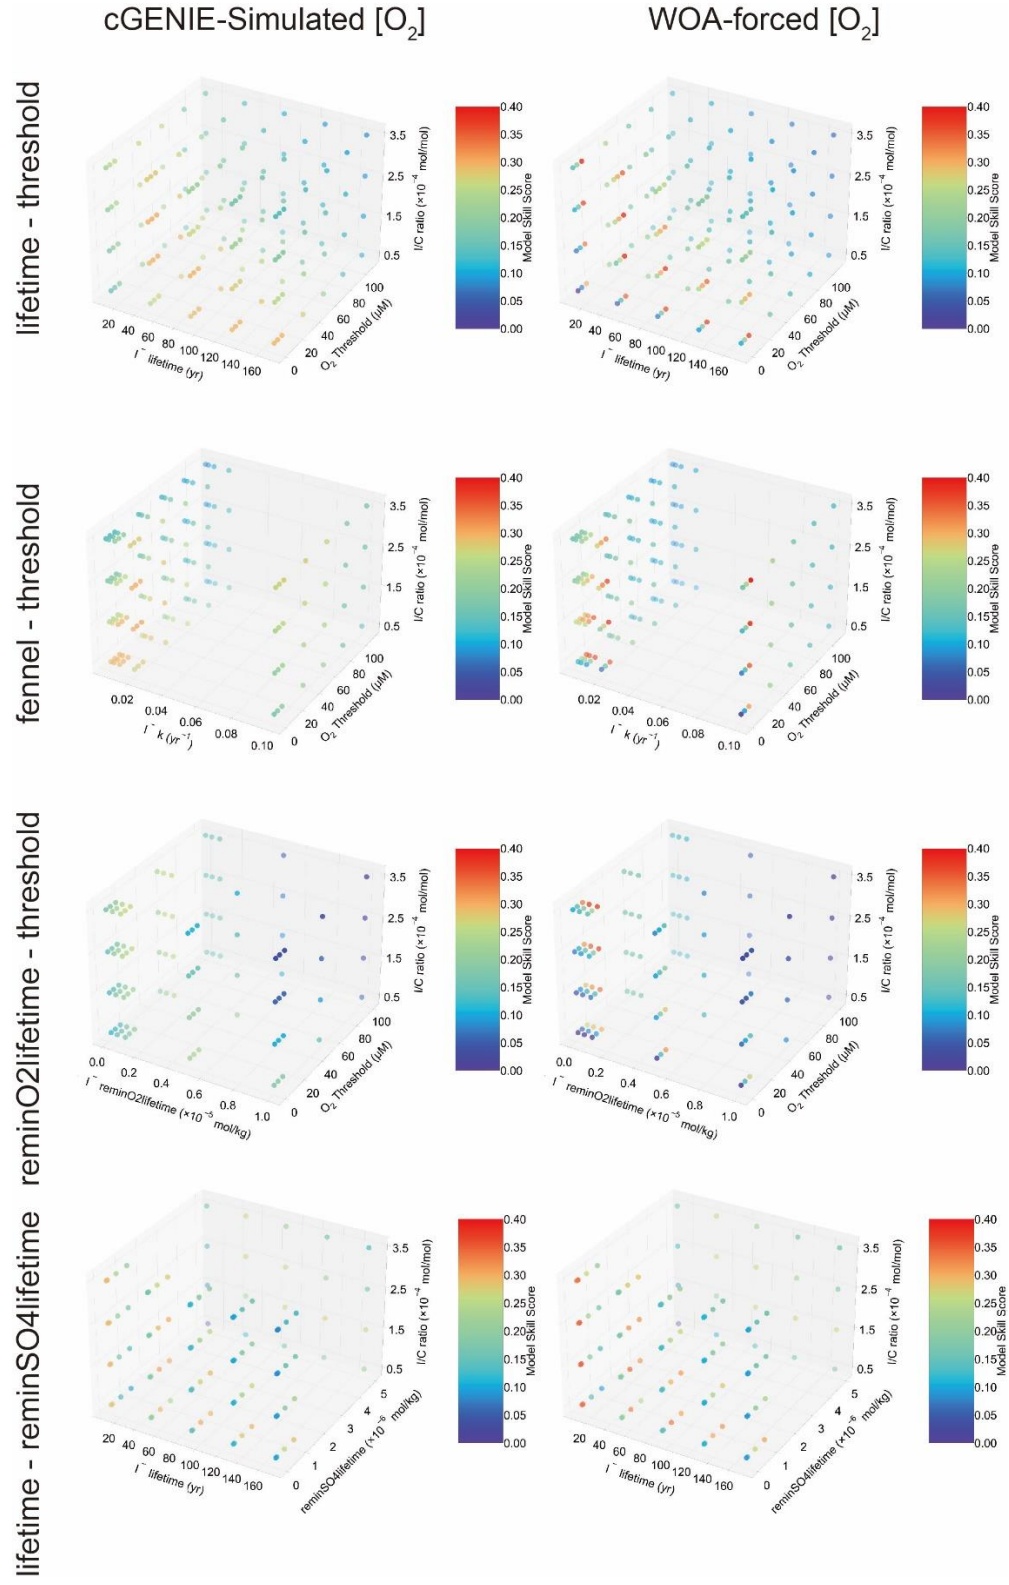

Figure S1. The three-dimensional model skill score array of all the experiment ensembles tested in this study.

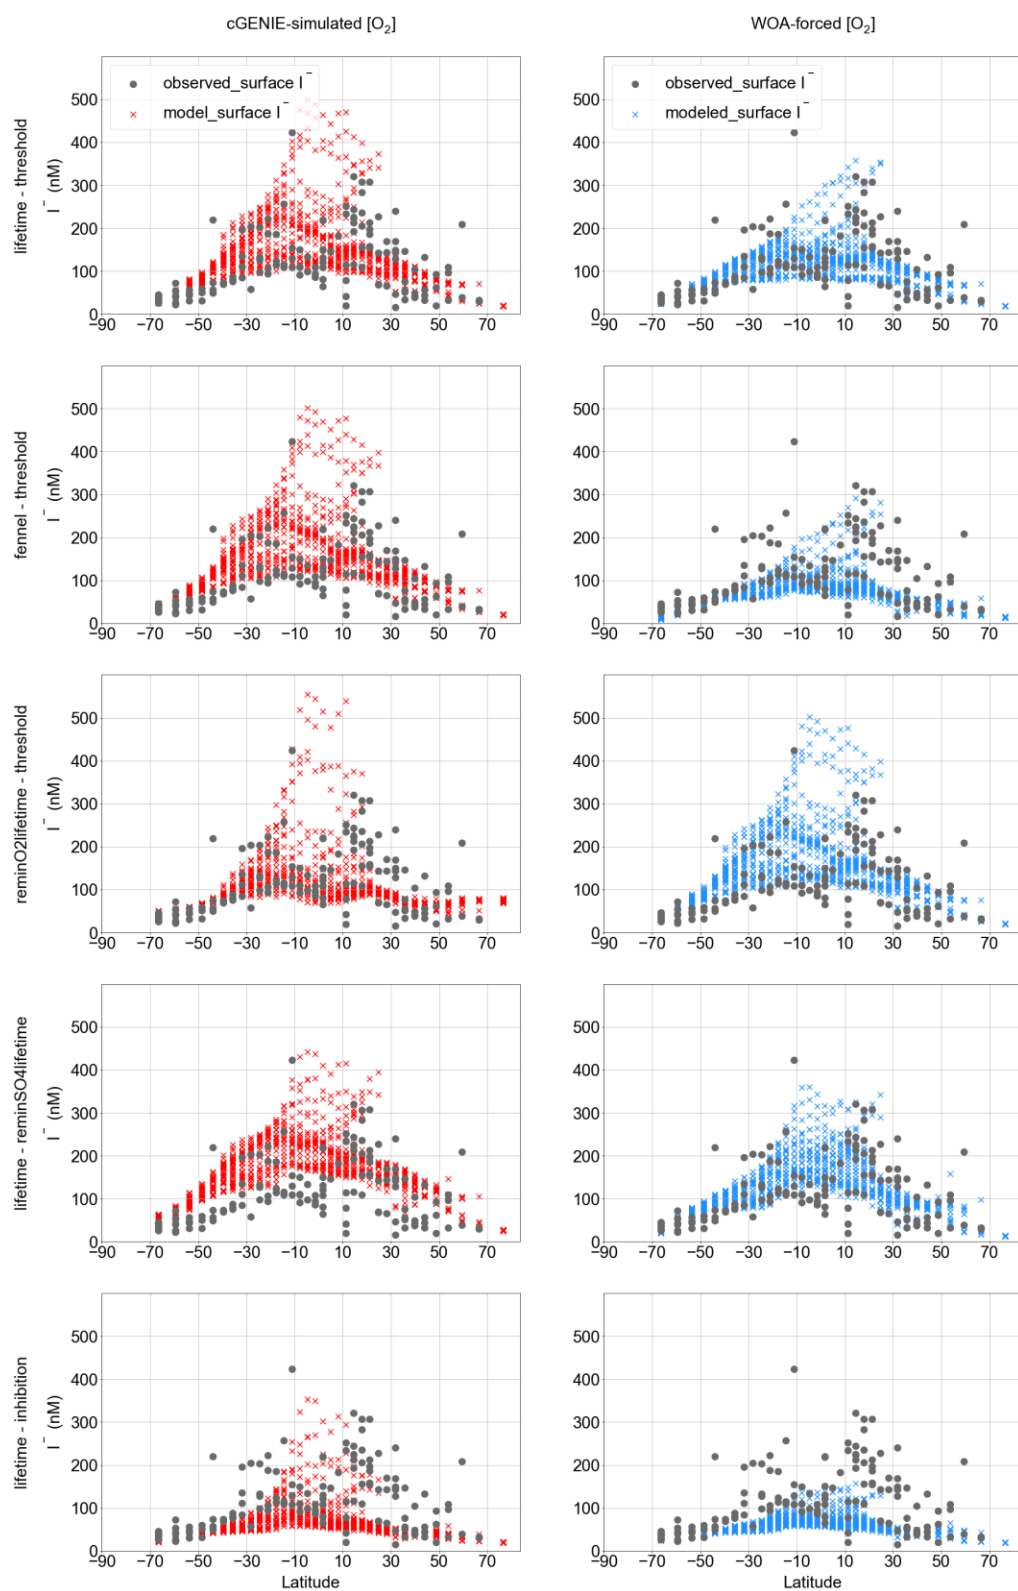

**Figure S2. Modeled latitudinal surface iodide distribution compared with observation with the cGENIE simulated  $[O_2]$  and the WOA-[ $O_2$ ] restoring forcing.**

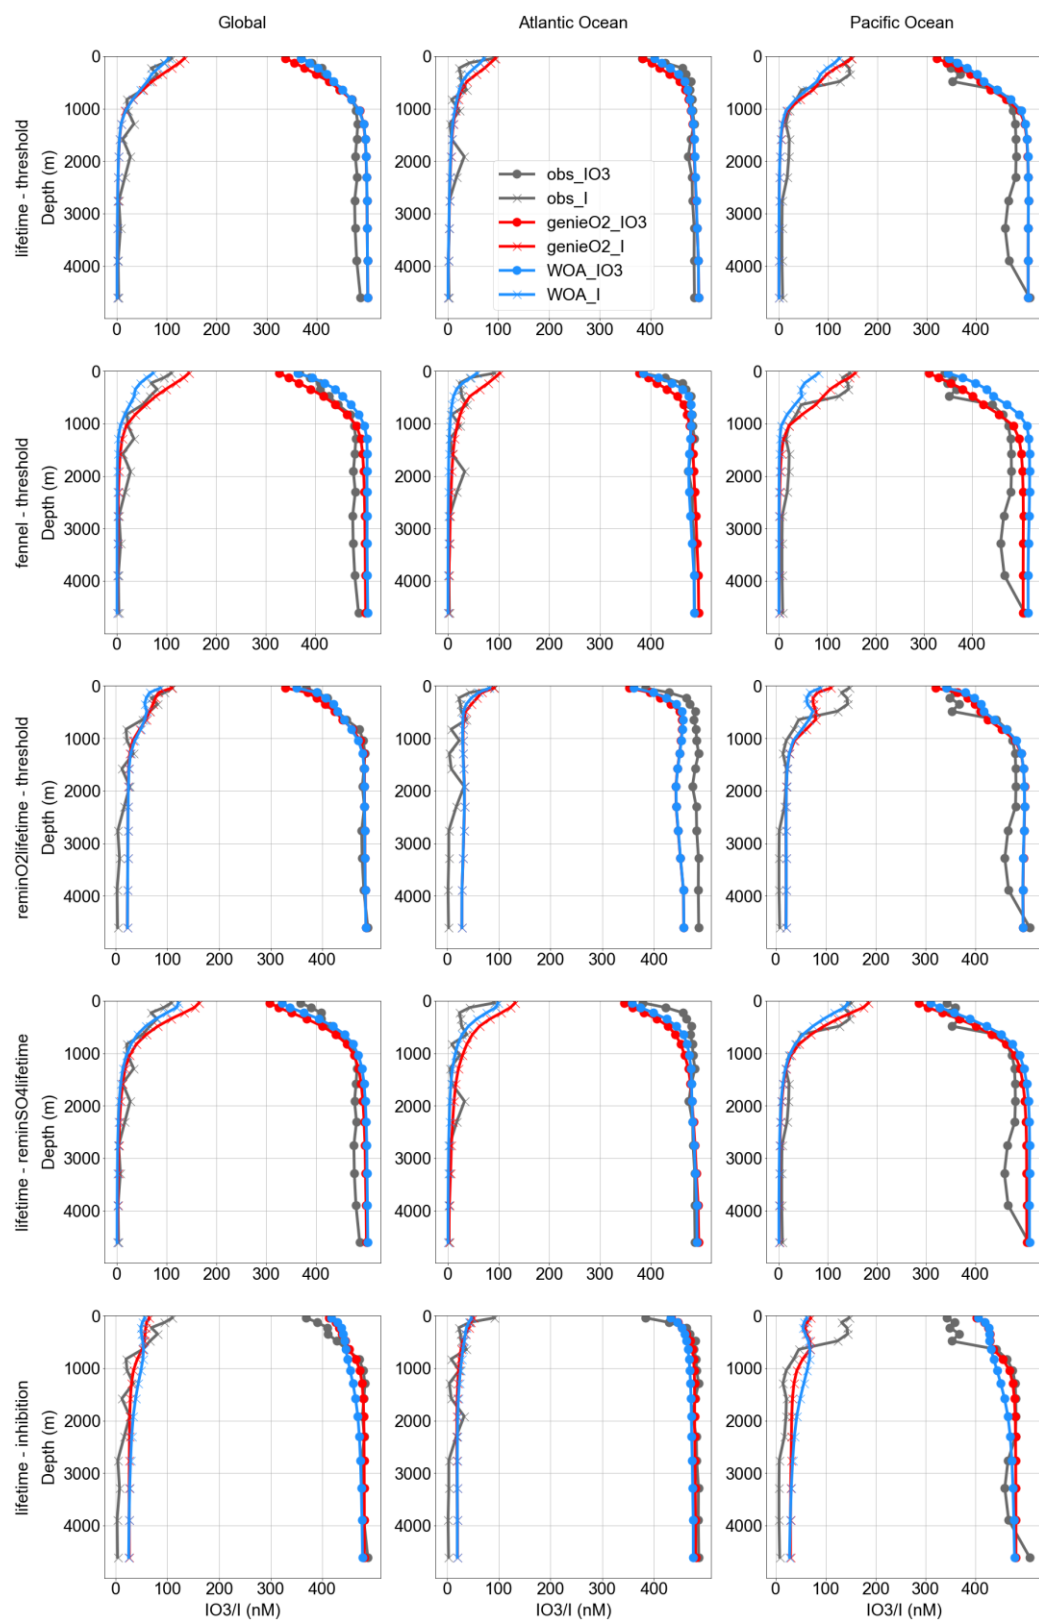

**Figure S3. Modeled averaged iodine (including iodate and iodide) depth profile among global ocean, the Pacific, the Atlantic compared with observation.**

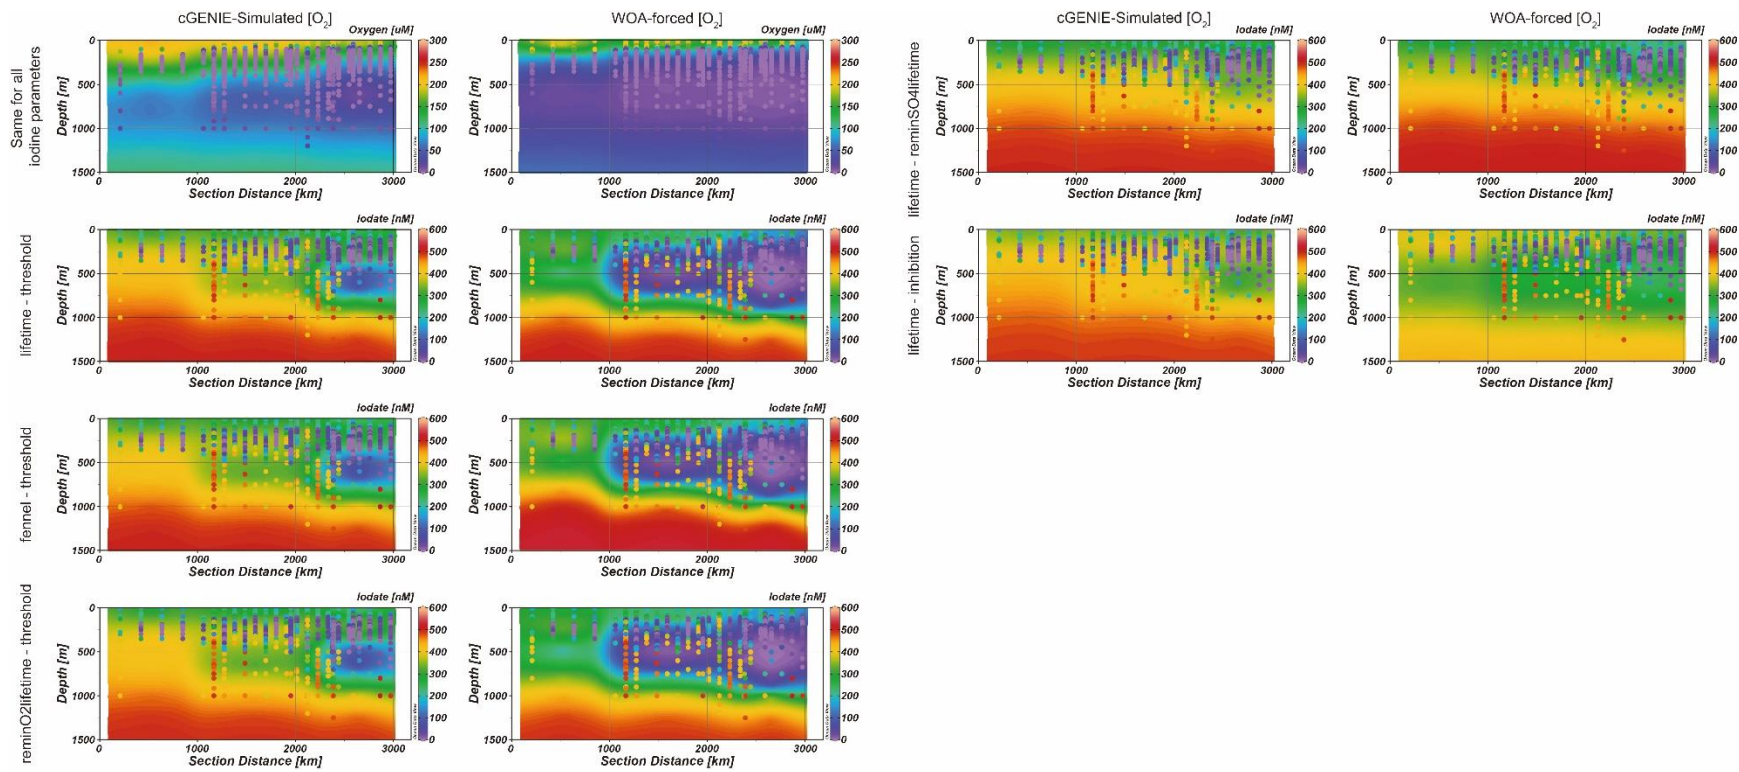

**Figure S4. Modeled (contour) and observed (colored dots) transects of  $\text{IO}_3^-$  in the ETNP.**



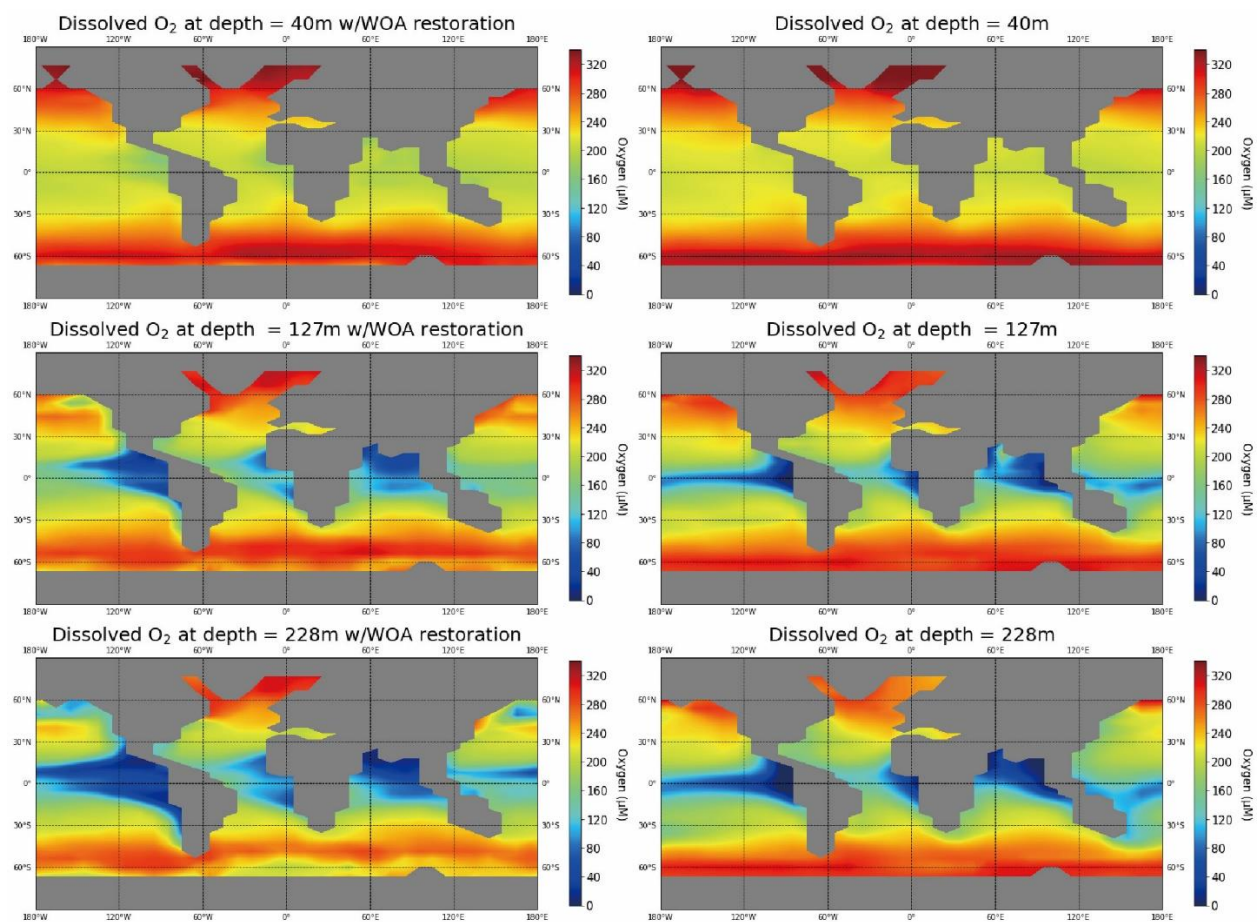

**Figure S5.** The modeled  $O_2$  distribution in the surface and subsurface with  $[O_2]$  forced to restore the WOA observation and without forcing.

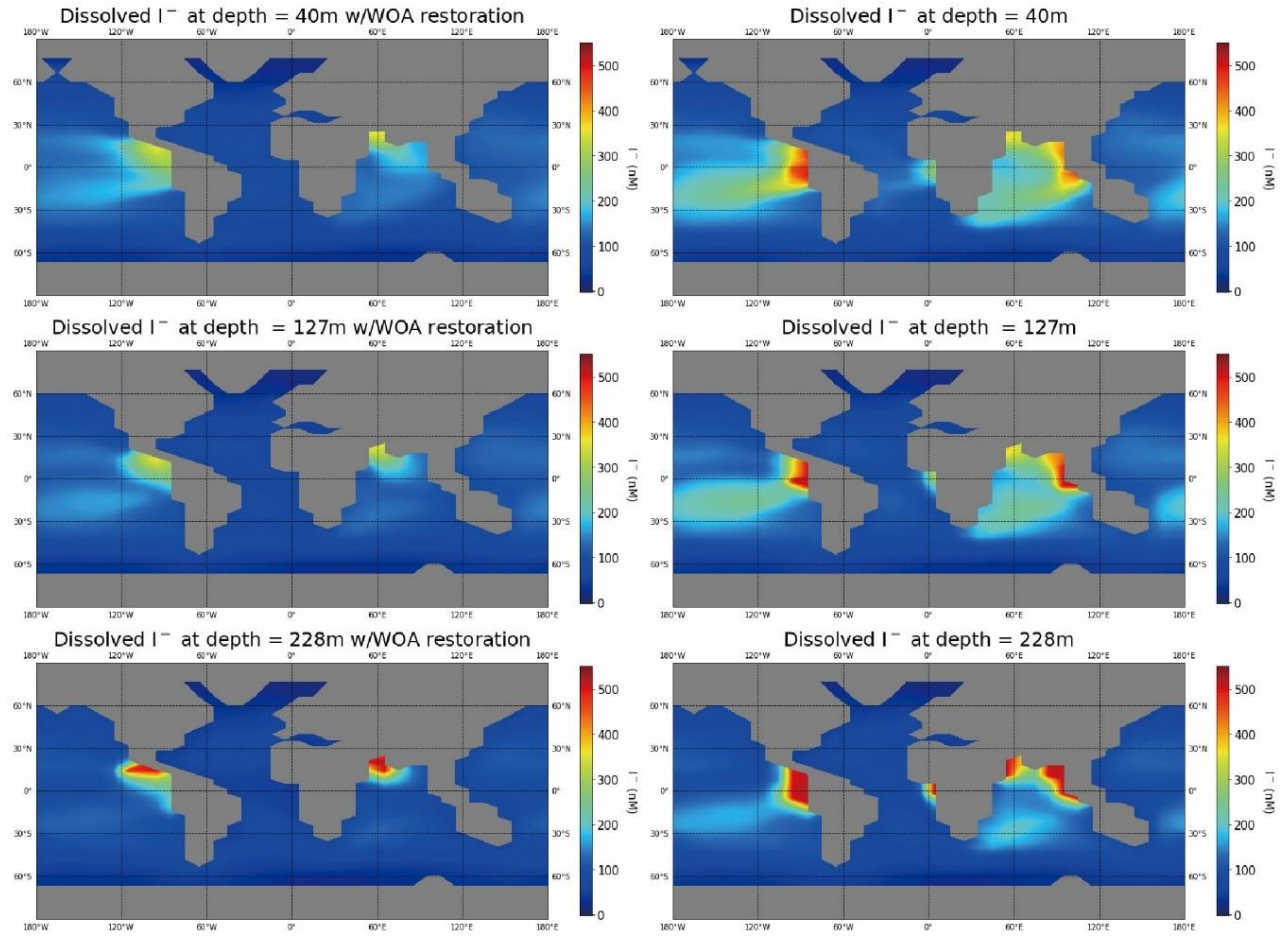

**Figure S6.** The modeled  $I^-$  distribution in the surface and subsurface with  $[O_2]$  forced to restore the WOA observation and without forcing. Associated iodine cycling parameters: “lifetime” = 50 yrs; “threshold” =  $10 \times 10^{-6}$  mol; I:C ratio =  $1.5 \times 10^{-4}$  mol/mol. This is an example of cGENIE overestimating surface  $I^-$  when the overall model performance is tuned to the best.

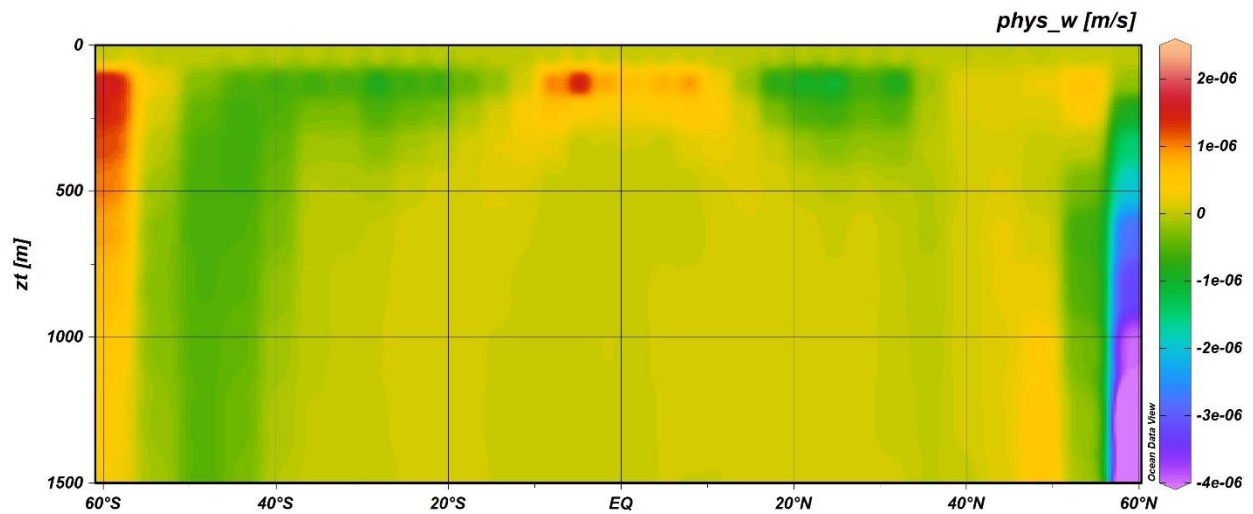

**Figure S7.** The averaged latitudinal distribution of vertical circulation ( $phys\_w$ ) simulated by cGENIE.

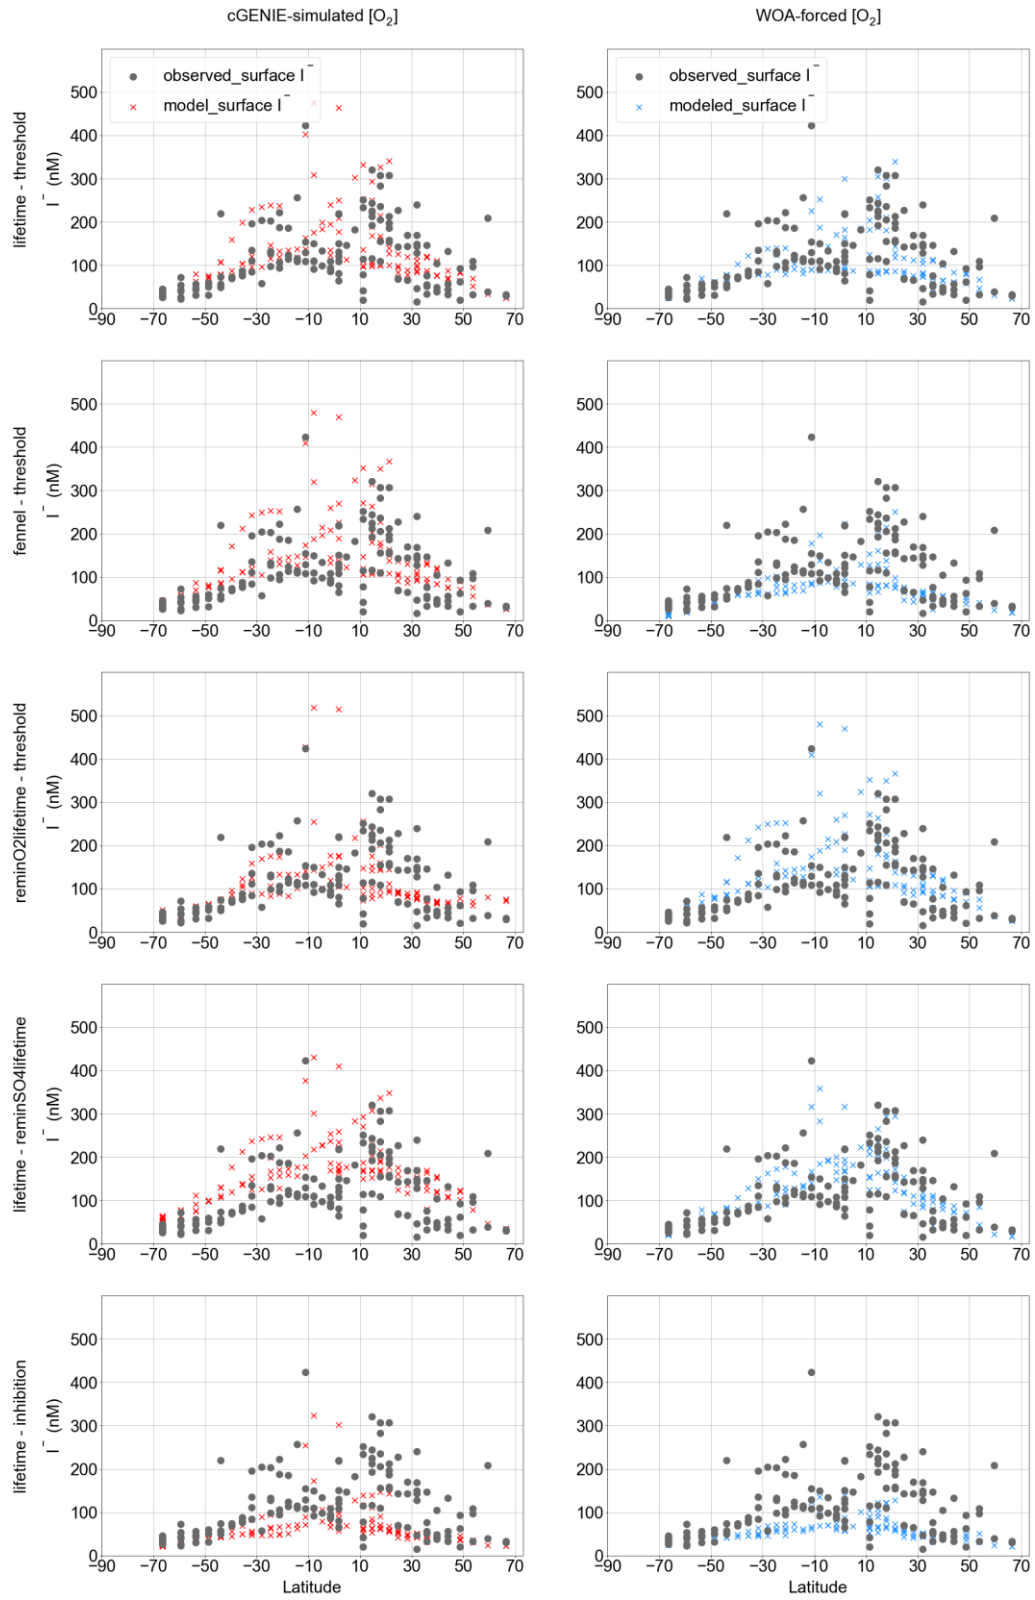

**Figure S8. Modeled latitudinal surface iodide distribution compared with observation with the cGENIE simulated  $[O_2]$  (masked only include grid points with corresponding observations) and the  $[O_2]$  restoring forcing.**

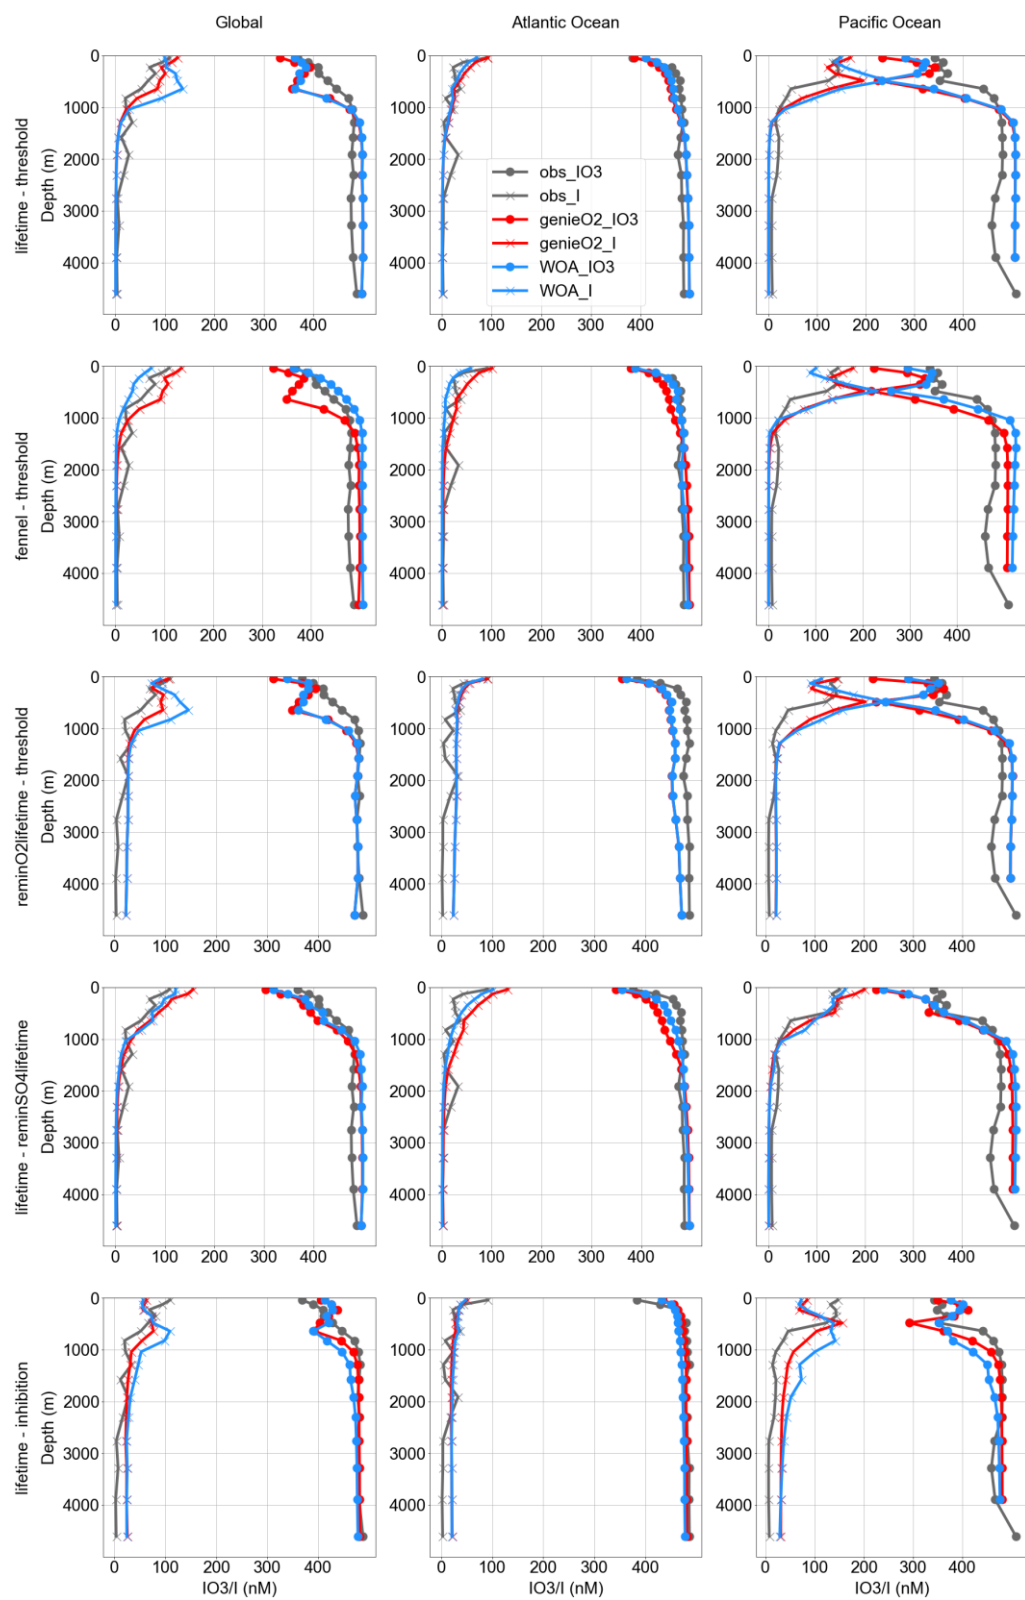

**Figure S9. Modeled averaged iodine (including iodate and iodide, and masked only include grid points with corresponding observations) depth profile among global ocean, the Pacific, the Atlantic compared with observation.**



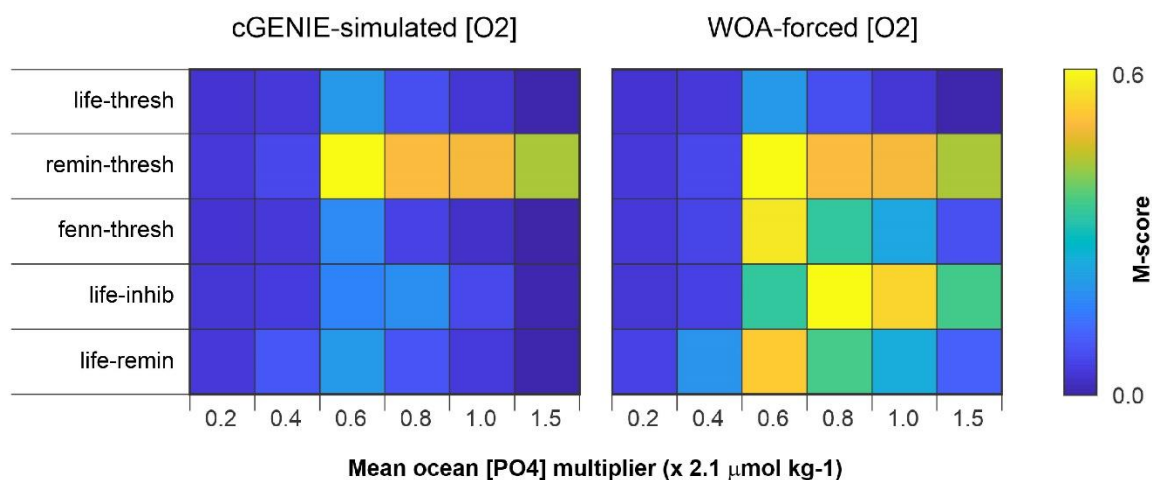

Figure S10. The model skill scores between modeled and measured I:Ca during the pre-OAE2. The iodine cycling parameters are derived from modern simulations with cGENIE-simulated [O<sub>2</sub>] and WOA-forced [O<sub>2</sub>], respectively. lifetime-thresh = lifetime-threshold; remin-thresh = reminO2lifetime-threshold; fenn-thresh = fennel-threshold; life-inhib = lifetime-inhibition; life-remin = lifetime-reminSO4lifetime

| Parameter description             |                                           | Iodine oxidation parameters |                                               |                                          | Iodine reduction parameters |                                  |                                        | I:C ratio (× 10 <sup>-4</sup> mol/mol) |                                                |
|-----------------------------------|-------------------------------------------|-----------------------------|-----------------------------------------------|------------------------------------------|-----------------------------|----------------------------------|----------------------------------------|----------------------------------------|------------------------------------------------|
|                                   |                                           | 'lifetime' (years)          | 'reminO2lifetime' (× 10 <sup>-5</sup> mol/kg) | 'Fennel' (Inhibition μM O <sub>2</sub> ) | constant/                   | 'threshold' (μM O <sub>2</sub> ) | 'inhibition' (μM/ year <sup>-1</sup> ) |                                        | 'reminSO4lifetime' (× 10 <sup>-6</sup> mol/kg) |
| 'lifetime'-<br>'threshold'        | cGENIE O <sub>2</sub>                     | 10-170                      | \                                             | \                                        |                             | 1-110                            | \                                      | \                                      | 0.5-3.5                                        |
|                                   | WOA                                       | 10-170                      | \                                             | \                                        |                             | 1-110                            | \                                      | \                                      | 0.5-3.5                                        |
|                                   | no excess I <sup>-</sup> filtration       | 10-170                      | \                                             | \                                        |                             | 1-110                            | \                                      | \                                      | 0.5-3.5                                        |
|                                   | no excess I <sup>-</sup> filtration + WOA | 10-170                      | \                                             | \                                        |                             | 1-110                            | \                                      | \                                      | 0.5-3.5                                        |
| 'reminO2lifetime'-<br>'threshold' | cGENIE O <sub>2</sub>                     | \                           | 0.01-1                                        | \                                        |                             | 1-100                            | \                                      | \                                      | 0.5-3.5                                        |
|                                   | WOA                                       | \                           | 0.01-1                                        | \                                        |                             | 1-100                            | \                                      | \                                      | 0.5-3.5                                        |
| 'Fennel'-<br>'threshold'          | cGENIE O <sub>2</sub>                     | 10-170 (1/k)                | \                                             | 20                                       |                             | 1-110                            | \                                      | \                                      | 0.5-3.5                                        |
|                                   | WOA                                       | 10-170 (1/k)                | \                                             | 20                                       |                             | 1-110                            | \                                      | \                                      | 0.5-3.5                                        |
|                                   | WOA(alternative)                          | 10-170 (1/k)                | \                                             | 20                                       |                             | 1-110                            | \                                      | \                                      | 0.5-3.5                                        |
| 'lifetime'-<br>'inhibition'       | cGENIE O <sub>2</sub>                     | 0.5-50                      | \                                             | \                                        |                             | \                                | 10/0.1-10                              | \                                      | 0.5-3.5                                        |
|                                   | WOA                                       | 0.5-50                      | \                                             | \                                        |                             | \                                | 10/1.0-10                              | \                                      | 0.5-3.5                                        |
| 'lifetime'-<br>'reminSO4lifetime' | cGENIE O <sub>2</sub>                     | 10-170                      | \                                             | \                                        |                             | \                                | \                                      | 0.01-1                                 | 0.5-3.5                                        |
|                                   | WOA                                       | 10-170                      | \                                             | \                                        |                             | \                                | \                                      | 0.01-1                                 | 0.5-3.5                                        |

**Table S1. The cGENIE iodine redox options and the associated range of parameters of these options in this research. Only simulations 1-3 are chosen for detailed discussion in the manuscript for higher M scores and reasonably replicating iodine ocean gradients (See Discussion).**

| Parameter description           |                                           | Iodine oxidation parameters |                                               |                                          | Iodine reduction parameters |                                  |                                        | I:C ratio (× 10 <sup>-4</sup> mol/mol) | Model skill score (global) |                                                |
|---------------------------------|-------------------------------------------|-----------------------------|-----------------------------------------------|------------------------------------------|-----------------------------|----------------------------------|----------------------------------------|----------------------------------------|----------------------------|------------------------------------------------|
|                                 |                                           | 'lifetime' (years)          | 'reminO2lifetime' (× 10 <sup>-5</sup> mol/kg) | 'Fennel' (Inhibition μM O <sub>2</sub> ) | constant/                   | 'threshold' (μM O <sub>2</sub> ) | 'inhibition' (μM/ year <sup>-1</sup> ) |                                        |                            | 'reminSO4lifetime' (× 10 <sup>-6</sup> mol/kg) |
| 'lifetime' - 'threshold'        | cGENIE O <sub>2</sub>                     | 50                          | \                                             | \                                        |                             | 10                               | \                                      | \                                      | 1.5                        | 0.305                                          |
|                                 | WOA                                       | 50                          | \                                             | \                                        |                             | 10                               | \                                      | \                                      | 1.5                        | 0.385                                          |
|                                 | no excess I <sup>-</sup> filtration       | 50                          | \                                             | \                                        |                             | 10                               | \                                      | \                                      | 2.5                        | 0.316                                          |
|                                 | no excess I <sup>-</sup> filtration + WOA | 50                          | \                                             | \                                        |                             | 10                               | \                                      | \                                      | 2.5                        | 0.393                                          |
| 'reminO2lifetime' - 'threshold' | cGENIE O <sub>2</sub>                     | \                           | 0.1                                           | \                                        |                             | 10                               | \                                      | \                                      | 3.5                        | 0.266                                          |
|                                 | WOA                                       | \                           | 0.1                                           | \                                        |                             | 10                               | \                                      | \                                      | 3.5                        | 0.365                                          |
| 'Fennel' - 'threshold'          | cGENIE O <sub>2</sub>                     | 50 (1/k)                    | \                                             | 20                                       |                             | 10                               | \                                      | \                                      | 1.5                        | 0.308                                          |
|                                 | WOA                                       | 10 (1/k)                    | \                                             | 20                                       |                             | 10                               | \                                      | \                                      | 3.5                        | 0.385                                          |
|                                 | WOA(alternative)                          | 50 (1/k)                    | \                                             | 20                                       |                             | 10                               | \                                      | \                                      | 1.5                        | 0.379                                          |
| 'lifetime' - 'inhibition'       | cGENIE O <sub>2</sub>                     | 50                          | \                                             | \                                        |                             | \                                | 10/0.1                                 | \                                      | 1.5                        | 0.289                                          |
|                                 | WOA                                       | 10                          | \                                             | \                                        |                             | \                                | 10/1.0                                 | \                                      | 1.5                        | 0.289                                          |
| 'lifetime' - 'reminSO4lifetime' | cGENIE O <sub>2</sub>                     | 50                          | \                                             | \                                        |                             | \                                | \                                      | 0.5                                    | 1.5                        | 0.307                                          |
|                                 | WOA                                       | 10                          | \                                             | \                                        |                             | \                                | \                                      | 0.1                                    | 2.5                        | 0.363                                          |

**Table S2. The performance of the cGENIE iodine simulations of all the combinations of parameters in this research and associated parameterization when the model reaches the best global M score.**

| Section         | Site location    | Depth                 | Pre-CIE d13C  | CIE d13C      | Post-CIE d13C | Pre-CIE I:Ca | CIE I:Ca | Post-CIE I:Ca |
|-----------------|------------------|-----------------------|---------------|---------------|---------------|--------------|----------|---------------|
| Raia del Pedale | Shallow water    | Few meters            | -0.353        | 2.013         | 0.681         | 0.688        | 0.837    | 1.296         |
| Demerara Rise   | Low lat. pelagic | Below base storm wave | -27.616 (org) | -23.816 (org) | -26.345 (org) | 0.427        | 0.530    | 0.153         |
| Tarfaya         | Low lat. pelagic | Below base storm wave | -27.019 (org) | -24.841 (org) | -26.729 (org) | 0.836        | 0.494    | 0.869         |

|               |                   |               |       |      |       |       |       |       |       |       |
|---------------|-------------------|---------------|-------|------|-------|-------|-------|-------|-------|-------|
| South Ferriby | Mid. lat. Pelagic | Below<br>base | storm | wave | 3.200 | 3.780 | 3.260 | 3.656 | 4.953 | 3.344 |
| Eastbourne    | Mid. lat. Pelagic | Below<br>base | storm | wave | 2.796 | 4.335 | 3.803 | 2.351 | 3.005 | 4.241 |
| Newfoundland  | Mid. lat. Pelagic | Below<br>base | storm | wave | 2.803 | 3.064 | 2.697 | 2.883 | 1.552 | 2.364 |

**Table S3. The Cretaceous OAE2 sections where I:Ca data were measured from for model-data comparison. The d13C from Demerara Rise and Tarfaya are organic data (d13Corg) instead of carbonate data.**
